# Supplementary material for: Ectopic expression of HIV-1 Tat modifies gene expression in cultured B cells: implications for the development of B-cell lymphomas in HIV-1-infected patients
Source: PeerJ. 2022 Oct 18;10:e13986. doi: 10.7717/peerj.13986 (PMC9586123; doi:10.7717/peerj.13986)
Supplement: Supplemental Information 2 [file peerj-10-13986-s002.xlsx]

## Sheet: UP FC 1.5 EGFP vs control
ensID	gene_name	gene_type	padj	log2FC	FC	mean count	GFP.1	GFP.2	GFP.3	LCL.1	LCL.2	LCL.3
ENSG00000021645	NRXN3	protein_coding	7.61476e-09	1.10013	2.14374	1298.36	1100.8	767.796	779.829	342.68	457.502	391.481
ENSG00000057657	PRDM1	protein_coding	4.53614e-13	0.592022	1.50736	1278.11	1519.7	1449.2	1281.76	921.47	934.146	924.917
ENSG00000183032	SLC25A21	protein_coding	5.36788e-09	0.863837	1.81987	232.034	521.243	401.542	467.466	247.134	240.236	256.578
ENSG00000138760	SCARB2	protein_coding	0.00203425	0.594184	1.50962	189.324	164.227	163.05	163.721	101.977	89.0118	117.268
ENSG00000259543	CTD-2034I4.1	lincRNA	1.91199e-05	1.16729	2.2459	159.697	292.753	201.988	203.574	86.3591	109.111	96.9884
ENSG00000263563	UBBP4	transcribed_unprocessed_pseudogene	0.000108776	1.12636	2.18307	133.402	215.4	259.177	445.924	147.913	113.897	132.257
ENSG00000198807	PAX9	protein_coding	0.00472338	0.6385	1.55671	99.4329	165.417	161.833	136.793	101.058	85.1834	92.5799
ENSG00000274090	RP11-415G4.1	lincRNA	0.00241623	0.924295	1.89776	92.5536	113.055	86.3923	75.3978	36.7485	44.9845	51.1393
ENSG00000234840	LINC01239	lincRNA	0.00645367	0.673318	1.59474	79.0351	139.236	121.679	106.634	67.0661	72.7409	74.0639
ENSG00000154162	CDH12	protein_coding	3.33967e-10	1.38412	2.61012	63.8743	179.698	175.218	165.875	58.7977	70.8266	62.6016
ENSG00000176204	LRRTM4	protein_coding	0.00645367	0.980367	1.97297	43.0065	133.286	88.8259	86.1689	37.6673	48.8129	53.7845
ENSG00000187134	AKR1C1	protein_coding	0.0156234	0.863661	1.81965	35.336	69.0231	92.4763	81.8605	38.586	38.2847	42.3222
ENSG00000151789	ZNF385D	protein_coding	0.00674868	1.03305	2.04635	29.621	78.5435	63.2732	62.4725	27.5614	29.6706	31.7417
ENSG00000219061	TRIM51FP	unprocessed_pseudogene	0.00800144	1.70397	3.25796	12.4222	29.7513	30.4198	26.9278	5.51228	7.65693	8.81713
ENSG00000265298	RP13-104F24.3	unprocessed_pseudogene	0.0185788	1.88846	3.70241	10.2543	20.2309	37.7206	12.9253	5.51228	3.82847	5.29028
ENSG00000225542	ZNF385D-AS1	antisense	0.0246794	1.57859	2.98679	9.34367	32.1314	24.3359	26.9278	9.18713	7.65693	5.29028
ENSG00000278254	RP4-668E10.4	lincRNA	0.00645367	2.58963	6.01945	7.62147	17.8508	23.1191	37.6989	0.918713	2.87135	6.17199

## Sheet: DOWN 1.5 EGFP vs control
ensID	gene_name	gene_type	padj	log2FC	FC	mean count	GFP.1	GFP.2	GFP.3	LCL.1	LCL.2	LCL.3
ENSG00000023445	BIRC3	protein_coding	7.48657e-11	-0.593093	0.66292	2005.62	1481.62	1621.99	1512.26	2379.47	2194.67	2493.48
ENSG00000102024	PLS3	protein_coding	6.80143e-16	-0.81018	0.570311	1911.74	1175.77	1426.08	1191.29	2229.72	2117.14	2395.61
ENSG00000168209	DDIT4	protein_coding	3.61008e-08	-0.675746	0.626008	1698.73	1380.46	1376.19	1301.15	2373.96	1908.49	2353.29
ENSG00000137959	IFI44L	protein_coding	2.3345e-15	-0.686427	0.621391	1599.21	759.254	685.054	676.426	1069.38	1123.65	1264.38
ENSG00000106034	CPED1	protein_coding	7.57061e-10	-0.740907	0.598363	837.971	716.412	582.844	580.563	1102.46	1124.61	980.465
ENSG00000158050	DUSP2	protein_coding	2.55165e-10	-0.694753	0.617815	815.859	603.357	519.571	545.018	1020.69	863.319	867.606
ENSG00000179873	NLRP11	protein_coding	3.20565e-12	-0.770602	0.586173	701.518	223.73	212.939	232.656	383.104	370.404	409.115
ENSG00000112149	CD83	protein_coding	5.95512e-11	-0.677416	0.625284	673.489	479.591	504.969	420.073	794.687	736.98	751.219
ENSG00000244342	LINC00698	lincRNA	3.54006e-06	-0.913571	0.530869	584.424	220.16	178.869	135.716	327.981	384.761	335.933
ENSG00000136960	ENPP2	protein_coding	1.02843e-10	-0.61701	0.652021	527.266	462.931	431.962	408.225	695.466	680.51	654.231
ENSG00000203386	LINC01317	lincRNA	1.5631e-09	-1.25419	0.419228	326.408	130.906	93.6931	105.557	241.622	322.548	253.933
ENSG00000235385	LINC02154	lincRNA	1.88859e-07	-1.0879	0.470445	272.564	54.7425	36.5038	45.2387	90.0339	98.583	113.741
ENSG00000136261	BZW2	protein_coding	3.46253e-09	-0.9066	0.533441	270.034	98.7744	120.463	116.328	218.654	218.223	207.203
ENSG00000078114	NEBL	protein_coding	5.99571e-06	-0.712647	0.6102	217.557	123.766	113.162	120.636	196.605	213.437	197.504
ENSG00000266602	RP11-476K15.1	lincRNA	2.17865e-05	-0.869736	0.547247	212.147	172.558	108.295	122.791	230.597	257.464	283.912
ENSG00000262801	U91319.1	lincRNA	0.000191675	-0.626942	0.647547	205.378	122.575	138.714	124.945	180.987	214.394	224.837
ENSG00000259712	CTD-2184D3.5	antisense	0.000415377	-0.619356	0.650961	177.248	129.716	139.931	138.947	191.092	217.265	246.88
ENSG00000135127	BICDL1	protein_coding	0.00173752	-0.601802	0.65893	162.754	94.0142	96.1266	92.6316	158.019	160.796	133.139
ENSG00000112137	PHACTR1	protein_coding	0.00326265	-0.646266	0.638932	154.022	104.725	82.7419	86.1689	134.132	152.182	168.407
ENSG00000163563	MNDA	protein_coding	0.00617393	-0.666076	0.630219	146.299	58.3126	73.0076	73.2436	101.058	102.411	144.601
ENSG00000152578	GRIA4	protein_coding	0.000298024	-0.850792	0.55448	142.943	69.0231	66.9236	50.6242	89.1152	130.168	135.784
ENSG00000162896	PIGR	protein_coding	0.00617393	-0.68498	0.622015	140.833	114.245	153.316	127.099	242.54	182.809	256.578
ENSG00000110848	CD69	protein_coding	0.000230677	-0.725184	0.60492	127.85	92.8242	94.9099	92.6316	170.881	147.396	167.525
ENSG00000046889	PREX2	protein_coding	0.0180941	-0.639831	0.641788	112.65	82.1137	76.658	73.2436	120.351	151.224	123.44
ENSG00000185630	PBX1	protein_coding	0.00798988	-0.76483	0.588523	109.558	47.6021	38.9374	40.9302	68.9035	89.969	77.5907
ENSG00000139352	ASCL1	protein_coding	0.000613259	-1.2068	0.433227	102.943	20.2309	20.6855	14.0024	50.5292	42.1131	44.9674
ENSG00000114268	PFKFB4	protein_coding	0.0100722	-0.633844	0.644457	98.5818	92.8242	97.3434	85.0918	148.832	131.125	179.869
ENSG00000113302	IL12B	protein_coding	0.00241866	-0.748393	0.595266	87.3219	59.5027	54.7557	46.3158	96.4649	99.5401	91.6981
ENSG00000152767	FARP1	protein_coding	0.000481101	-0.899344	0.53613	81.2058	73.7833	51.1053	64.6267	99.2211	146.439	132.257
ENSG00000166211	SPIC	protein_coding	0.000743451	-1.04891	0.483333	71.8974	19.0409	35.287	40.9302	71.6596	69.8695	73.1822
ENSG00000121552	CSTA	protein_coding	0.00755955	-0.976031	0.508376	64.643	40.4618	54.7557	35.5447	119.433	84.2263	82.881
ENSG00000224565	LINC01754	lincRNA	0.0228179	-0.720149	0.607035	52.998	39.2718	49.8885	50.6242	79.9281	76.5693	99.6336
ENSG00000251002	AE000661.37	processed_transcript	0.0104777	-1.11704	0.461039	29.1341	14.2806	23.1191	18.3109	46.8544	35.4133	55.5479
ENSG00000137673	MMP7	protein_coding	3.39343e-05	-1.92226	0.26384	26.6491	14.2806	8.51755	6.46267	41.3421	43.0702	37.9137
ENSG00000224309	ANKRD30BP2	transcribed_unprocessed_pseudogene	0.0487541	-1.54148	0.343532	16.6509	3.57016	3.65038	5.38556	14.6994	12.4425	21.1611
ENSG00000104447	TRPS1	protein_coding	0.0477642	-1.56648	0.33763	16.5256	5.95027	3.65038	2.15422	11.0246	19.1423	14.9891

## Sheet: UP FC1.5 Tat vs control
ensID	gene_name	gene_type	padj	log2FC	FC	mean count	LCL.1	LCL.2	LCL.3	Tat.1	Tat.2	Tat.3
ENSG00000251562	MALAT1	lincRNA	9.86581e-22	1.28455	2.43606	34783.3	20968.7	27180.2	23616.7	50979.7	64565.6	62234
ENSG00000242265	PEG10	protein_coding	1.28147e-161	2.11011	4.31725	11043.9	5809.03	6482.55	5989.48	24926.4	27339.3	26950.5
ENSG00000087086	FTL	protein_coding	3.87433e-30	0.955379	1.93909	9513.75	8083.76	7250.16	6650.76	14250.8	14218.7	14488.5
ENSG00000135679	MDM2	protein_coding	2.65166e-64	0.963753	1.95038	8865.95	6614.74	6572.52	6873.83	13397.1	12741.8	13108.7
ENSG00000171848	RRM2	protein_coding	1.21724e-72	0.902522	1.86933	7448.1	5946.83	5669.96	5830.77	11022.8	10466.5	11204.8
ENSG00000009694	TENM1	protein_coding	2.66135e-44	1.9481	3.85867	6518.56	2776.35	3417.86	3053.37	10142.9	12646.4	13348.7
ENSG00000240040	AC096579.15	processed_transcript	2.3901e-23	0.615068	1.53163	6016.81	4725.86	4478.35	4912.9	7371.85	6934.06	7442.78
ENSG00000115415	STAT1	protein_coding	2.87256e-126	1.24224	2.36565	5881.98	3672.1	3677.24	3736.7	9192.93	8433.68	8665.6
ENSG00000183580	FBXL7	protein_coding	2.58488e-11	1.15558	2.22774	5106.05	2625.68	3526.97	2806.49	5464.23	7765.17	7333.38
ENSG00000133639	BTG1	protein_coding	8.80133e-30	0.613494	1.52996	4702.35	4328.98	4107.94	4115.84	6478.32	6270.08	6541.99
ENSG00000149485	FADS1	protein_coding	2.60453e-34	0.684804	1.60748	4414.25	3862.27	3810.28	3916.57	6436.51	5980.33	6294.95
ENSG00000186480	INSIG1	protein_coding	9.90524e-126	1.27471	2.4195	3466.41	2569.64	2650.26	2566.67	6081.63	6331.85	6481.11
ENSG00000245532	NEAT1	lincRNA	2.2477e-08	0.731516	1.66038	3039.09	2340.88	2942.18	2428.24	3756.9	4896.71	4436.91
ENSG00000099875	MKNK2	protein_coding	3.3352e-82	1.17383	2.2561	2600.1	2201.24	2040.57	1968.86	4909.06	4616.95	4542.78
ENSG00000118308	LRMP	protein_coding	3.04975e-28	0.640323	1.55868	2597.51	2150.71	2066.41	2303.92	3366.04	3368.02	3484.94
ENSG00000157601	MX1	protein_coding	1.69489e-26	0.851268	1.80409	2516.52	1735.45	1679.74	1745.79	3365.07	2990.17	3031.46
ENSG00000177084	POLE	protein_coding	3.01881e-27	0.638369	1.55657	2486.67	2011.06	2118.1	1961.81	3166.73	3295.36	3065.87
ENSG00000111335	OAS2	protein_coding	1.66433e-36	0.779404	1.71642	2341	1638.98	1637.63	1681.43	2896.43	2922.95	2737.67
ENSG00000129682	FGF13	protein_coding	7.47902e-11	0.866096	1.82272	1946.6	1130.94	1361.98	1177.09	1906.65	2522.38	2406.82
ENSG00000173068	BNC2	protein_coding	1.66767e-06	0.8105	1.75382	1834.25	1141.96	1420.36	1248.51	1846.37	2575.97	2509.16
ENSG00000124762	CDKN1A	protein_coding	7.01473e-17	0.659462	1.57949	1643	1462.59	1284.45	1328.74	2306.25	2028.26	2164.19
ENSG00000137959	IFI44L	protein_coding	1.45205e-52	1.13192	2.19151	1599.21	1069.38	1123.65	1264.38	2583.36	2514.21	2534.74
ENSG00000260658	RP11-368L12.1	lincRNA	7.04141e-05	0.672178	1.59348	1545.91	961.893	1243.29	1167.39	1508.98	2003.74	2081.26
ENSG00000165995	CACNB2	protein_coding	3.08231e-06	0.62144	1.53841	1531.92	1067.55	1272.01	1142.7	1576.07	2157.24	1761.88
ENSG00000176915	ANKLE2	protein_coding	2.57131e-18	0.601781	1.51759	1480.17	1281.61	1181.08	1113.6	1885.26	1806.63	1777.76
ENSG00000100906	NFKBIA	protein_coding	9.12012e-22	0.953906	1.93711	1476.47	1370.72	1156.2	1190.31	2639.75	2231.72	2412.99
ENSG00000160294	MCM3AP	protein_coding	9.31596e-20	0.600631	1.51638	1466.56	1162.17	1157.15	1185.02	1754	1797.55	1798.94
ENSG00000259867	RP11-525K10.3	antisense	4.05444e-11	1.11258	2.16231	1456.56	816.736	1065.27	828.81	1624.68	2301.66	2105.08
ENSG00000258932	CTD-3006G17.2	transcribed_processed_pseudogene	0.000317449	0.603127	1.51901	1419.01	898.502	1138.97	1128.59	1381.61	1652.22	1970.1
ENSG00000187608	ISG15	protein_coding	2.99717e-11	0.889503	1.85254	1326.02	1084.08	840.348	900.229	2114.72	1592.27	1646.3
ENSG00000021645	NRXN3	protein_coding	2.58887e-37	2.17367	4.5117	1298.36	342.68	457.502	391.481	1449.67	1989.2	2037.15
ENSG00000133703	KRAS	protein_coding	2.71616e-17	0.856521	1.81067	1227.85	801.118	946.588	871.132	1439.95	1705.81	1656.89
ENSG00000196664	TLR7	protein_coding	7.93195e-74	1.50575	2.83972	1212.69	644.018	700.609	689.499	1846.37	2027.35	1934.81
ENSG00000147050	KDM6A	protein_coding	6.72675e-07	0.669156	1.59014	1209.76	792.85	1039.43	924.917	1288.27	1715.8	1491.03
ENSG00000123106	CCDC91	protein_coding	7.22e-07	0.649347	1.56846	1193.91	819.492	988.701	932.852	1234.8	1573.2	1595.13
ENSG00000279877	RP11-420N3.3	processed_transcript	1.22091e-07	1.41033	2.65799	1145.76	512.642	705.395	551.952	1203.69	2140.89	1649.83
ENSG00000265206	RP5-1171I10.5	antisense	2.309e-16	0.785751	1.72399	1129.57	1004.15	804.935	906.401	1640.24	1483.27	1617.19
ENSG00000138640	FAM13A	protein_coding	6.16784e-07	0.632509	1.55026	1074.31	710.165	801.107	826.165	1066.59	1381.54	1260.76
ENSG00000152495	CAMK4	protein_coding	2.581e-11	0.846758	1.79845	1025.18	713.84	886.29	777.671	1253.27	1526.87	1582.78
ENSG00000173064	HECTD4	protein_coding	0.000139258	0.608646	1.52483	1022.49	798.362	942.76	761.8	1095.76	1621.34	1239.58
ENSG00000160299	PCNT	protein_coding	6.6214e-13	0.631747	1.54944	1001.93	798.362	873.847	729.177	1228.97	1332.49	1200.76
ENSG00000175215	CTDSP2	protein_coding	5.14448e-26	0.834476	1.78321	994.741	802.956	775.264	688.618	1369.95	1322.5	1381.63
ENSG00000087448	KLHL42	protein_coding	6.35405e-23	0.765692	1.70018	982.511	767.126	776.222	771.499	1333	1269.82	1364.86
ENSG00000137965	IFI44	protein_coding	8.00736e-33	0.912919	1.88285	979.903	679.848	691.038	772.381	1396.2	1282.54	1388.68
ENSG00000181722	ZBTB20	protein_coding	0.000395769	0.624515	1.54169	979.52	664.23	812.592	789.133	955.754	1297.98	1394.86
ENSG00000198840	MT-ND3	protein_coding	2.12214e-09	0.927031	1.90136	971.507	810.305	826.949	623.371	1508.01	1633.15	1280.17
ENSG00000185565	LSAMP	protein_coding	3.18738e-08	0.866801	1.82362	923.944	447.413	582.884	491.996	806.023	1005.5	1048.13
ENSG00000148143	ZNF462	protein_coding	8.66747e-20	1.21714	2.32486	912.404	537.447	603.941	460.254	1092.85	1374.28	1317.22
ENSG00000153707	PTPRD	protein_coding	1.38039e-49	1.76597	3.40103	874.863	360.136	445.059	446.147	1315.5	1469.65	1514.85
ENSG00000248837	RP11-412P11.1	lincRNA	9.48928e-08	0.994416	1.99227	859.728	430.877	663.282	499.931	861.443	1224.41	1212.23
ENSG00000139651	ZNF740	protein_coding	1.23033e-15	0.597904	1.51352	837.264	699.141	716.88	664.812	1066.59	1050.92	1058.72
ENSG00000105967	TFEC	protein_coding	8.88304e-23	1.23721	2.35743	814.779	459.357	499.615	496.404	1071.46	1057.28	1354.28
ENSG00000198830	HMGN2	protein_coding	7.77603e-09	0.61052	1.52681	787.138	694.547	652.754	597.801	1152.16	925.571	944.905
ENSG00000169826	CSGALNACT2	protein_coding	9.16104e-12	0.634605	1.55251	784.882	624.725	721.666	703.607	993.673	1156.28	1072.83
ENSG00000258168	RP11-588H23.3	antisense	1.34615e-07	0.654183	1.57372	750.329	541.122	686.253	586.339	864.359	1079.98	972.255
ENSG00000111962	UST	protein_coding	4.54494e-11	0.737684	1.6675	750.283	520.911	628.826	587.221	857.554	1094.52	993.429
ENSG00000169136	ATF5	protein_coding	4.11647e-14	0.774945	1.71113	728.951	615.538	502.486	546.662	1085.07	933.745	873.441
ENSG00000261645	DISC1FP1	processed_transcript	1.57359e-06	0.813648	1.75765	721.24	436.389	590.541	478.77	734.074	976.436	1034.9
ENSG00000265972	TXNIP	protein_coding	8.32935e-29	1.17141	2.25232	715.497	463.032	450.802	569.587	1105.49	1131.76	1144.3
ENSG00000179873	NLRP11	protein_coding	6.83945e-57	1.3384	2.52871	701.518	383.104	370.404	409.115	977.144	947.37	1033.13
ENSG00000213047	DENND1B	protein_coding	1.91951e-57	1.57926	2.98817	675.412	263.671	280.435	312.126	781.715	855.631	941.376
ENSG00000205035	RP11-707M1.1	transcribed_unprocessed_pseudogene	9.31793e-11	1.15967	2.23407	667.34	345.436	448.888	377.373	672.82	1065.45	961.668
ENSG00000136010	ALDH1L2	protein_coding	3.88854e-44	1.31825	2.49364	662.089	342.68	372.318	361.502	864.359	942.829	899.027
ENSG00000205592	MUC19	processed_transcript	4.95343e-21	0.795576	1.73577	647.716	501.618	469.944	545.78	878.944	874.705	906.968
ENSG00000183255	PTTG1IP	protein_coding	3.11276e-24	0.83693	1.78624	644.858	479.568	467.073	446.147	891.583	809.307	809.918
ENSG00000152061	RABGAP1L	protein_coding	1.05684e-11	0.900218	1.86635	638.8	433.633	463.244	468.19	751.575	1011.86	838.151
ENSG00000120451	SNX19	protein_coding	1.23033e-15	0.691761	1.61525	638.088	485.999	536.942	486.706	809.912	846.547	807.272
ENSG00000226608	FTLP3	processed_pseudogene	1.2543e-22	0.998418	1.99781	620.17	509.886	409.646	462.018	958.671	954.637	880.5
ENSG00000138434	SSFA2	protein_coding	5.9561e-24	0.805187	1.74737	611.007	468.544	464.202	442.62	794.355	802.04	826.681
ENSG00000198040	ZNF84	protein_coding	6.61896e-32	0.972781	1.96262	605.889	423.527	454.63	421.459	821.579	892.871	854.914
ENSG00000101224	CDC25B	protein_coding	3.62005e-09	0.641201	1.55963	599.559	508.049	508.229	438.211	754.492	821.115	731.397
ENSG00000214944	ARHGEF28	protein_coding	1.69989e-12	0.77078	1.70619	579.241	395.047	444.102	424.104	665.041	743.908	779.921
ENSG00000273118	AC079610.1	sense_overlapping	1.88581e-06	0.726229	1.65431	563.881	397.803	513.972	416.168	690.321	769.341	806.389
ENSG00000090612	ZNF268	protein_coding	6.05514e-11	0.640377	1.55874	562.938	453.844	427.831	447.91	692.265	695.768	714.634
ENSG00000185483	ROR1	protein_coding	8.36639e-17	1.52695	2.88175	562.379	264.589	353.176	268.922	672.82	972.803	976.666
ENSG00000176406	RIMS2	protein_coding	3.4976e-11	0.982177	1.97544	532.713	164.45	211.523	243.353	369.467	437.807	447.308
ENSG00000125148	MT2A	protein_coding	1.91122e-12	0.76707	1.70181	517.799	452.007	457.502	380.9	797.272	734.825	698.753
ENSG00000230448	LINC00276	lincRNA	0.000262243	0.585147	1.50019	517.657	452.926	536.942	477.007	592.12	812.94	880.5
ENSG00000234663	LINC01934	lincRNA	1.40629e-09	0.898853	1.86458	516.909	316.956	386.675	339.459	539.617	705.759	751.689
ENSG00000173611	SCAI	protein_coding	5.29677e-07	0.633541	1.55137	506.949	356.461	449.845	424.986	605.732	714.842	633.466
ENSG00000166750	SLFN5	protein_coding	1.34923e-35	1.23888	2.36015	491.255	314.2	313.934	354.449	846.858	764.799	732.279
ENSG00000232368	FTLP2	processed_pseudogene	2.04159e-19	0.969036	1.95753	487.436	420.771	342.648	342.105	766.159	727.558	700.518
ENSG00000186153	WWOX	protein_coding	6.37452e-07	1.0126	2.01755	475.369	270.102	334.034	318.298	494.892	848.364	602.586
ENSG00000089127	OAS1	protein_coding	3.9809e-14	0.858558	1.81323	472.725	321.55	295.749	330.642	661.152	530.455	557.591
ENSG00000147650	LRP12	protein_coding	1.60958e-10	0.901989	1.86864	464.673	305.932	309.149	335.051	520.171	663.068	636.112
ENSG00000115896	PLCL1	protein_coding	1.5581e-13	1.30949	2.47855	451.377	240.703	340.734	294.492	585.314	810.215	836.386
ENSG00000184743	ATL3	protein_coding	4.07873e-10	0.598198	1.51382	447.759	325.225	370.404	365.029	525.033	578.595	524.947
ENSG00000078328	RBFOX1	protein_coding	7.50268e-10	1.11886	2.17175	445.687	257.24	310.106	278.621	520.171	752.991	625.525
ENSG00000162924	REL	protein_coding	2.55338e-08	0.632654	1.55041	432.766	378.51	383.804	372.083	565.869	640.36	585.823
ENSG00000163840	DTX3L	protein_coding	3.99793e-24	0.888936	1.85181	427.425	311.444	328.291	330.642	604.76	594.945	614.056
ENSG00000159388	BTG2	protein_coding	3.94796e-13	0.855375	1.80923	426.417	367.485	308.192	342.105	695.182	536.813	644.053
ENSG00000141576	RNF157	protein_coding	1.51885e-24	1.08162	2.11641	423.411	250.809	259.379	290.965	532.811	623.103	560.238
ENSG00000176871	WSB2	protein_coding	1.30812e-07	0.596638	1.51219	420.534	361.054	325.42	336.814	511.421	542.263	524.065
ENSG00000111725	PRKAB1	protein_coding	4.54494e-11	0.605042	1.52102	419.314	328.899	328.291	336.814	487.114	517.738	525.829
ENSG00000143297	FCRL5	protein_coding	7.19833e-17	0.953315	1.93632	415.929	312.363	331.162	350.04	569.758	710.301	673.168
ENSG00000135916	ITM2C	protein_coding	5.19287e-07	0.720774	1.64807	414.517	316.956	217.265	291.847	523.088	451.431	427.016
ENSG00000114423	CBLB	protein_coding	3.81665e-12	0.958816	1.94371	404.46	295.826	331.162	324.47	529.894	692.134	666.992
ENSG00000064763	FAR2	protein_coding	7.24827e-12	0.88754	1.85002	404.274	236.109	259.379	241.589	408.359	488.672	494.068
ENSG00000185551	NR2F2	protein_coding	0.000526136	0.639852	1.55817	403.722	315.119	399.118	273.331	451.139	664.885	496.715
ENSG00000179915	NRXN1	protein_coding	1.32051e-06	0.632992	1.55078	383.799	255.402	319.677	284.793	407.387	469.598	488.774
ENSG00000198393	ZNF26	protein_coding	4.92695e-15	0.80242	1.74402	379.626	282.045	286.178	260.987	443.361	519.555	500.244
ENSG00000138496	PARP9	protein_coding	1.48509e-14	0.819445	1.76473	376.341	296.744	274.692	285.675	503.643	475.048	556.709
ENSG00000205045	SLFN12L	protein_coding	7.90701e-14	0.961022	1.94669	373.648	248.053	250.765	208.966	430.721	525.005	447.308
ENSG00000060709	RIMBP2	protein_coding	1.43503e-06	0.948833	1.93031	363.506	227.841	290.963	201.031	398.636	592.22	459.66
ENSG00000111110	PPM1H	protein_coding	2.00615e-14	0.910005	1.87905	354.954	235.191	235.451	230.127	414.193	480.497	444.661
ENSG00000177675	CD163L1	protein_coding	2.54523e-15	0.971293	1.9606	345.296	248.971	241.193	246.88	519.199	465.964	486.128
ENSG00000184014	DENND5A	protein_coding	2.68429e-39	1.32227	2.50059	335.796	248.053	230.665	218.665	598.926	591.312	569.943
ENSG00000100852	ARHGAP5	protein_coding	7.50758e-09	0.669586	1.59062	333.99	232.434	287.135	273.331	428.777	408.741	448.19
ENSG00000197603	C5orf42	protein_coding	1.10976e-07	0.613166	1.52961	323.362	242.54	277.564	260.105	378.218	448.706	389.961
ENSG00000106069	CHN2	protein_coding	3.15139e-11	1.3839	2.60973	321.859	179.149	234.494	165.762	410.303	621.286	536.417
ENSG00000226965	AC003088.1	lincRNA	2.26745e-11	1.19317	2.28655	319.394	190.174	243.108	199.267	415.165	533.18	541.71
ENSG00000120860	WASHC3	protein_coding	8.71824e-10	0.619764	1.53662	318.749	273.777	274.692	266.277	416.137	424.182	430.545
ENSG00000073910	FRY	protein_coding	3.4113e-22	1.16413	2.24098	310.518	166.287	186.638	197.504	376.273	445.073	429.663
ENSG00000079950	STX7	protein_coding	2.39426e-09	0.638225	1.55641	310.398	274.695	243.108	233.654	401.553	386.033	401.43
ENSG00000238129	RP3-410C9.2	lincRNA	8.19366e-15	0.861162	1.8165	307.449	224.166	215.351	238.944	443.361	376.95	432.309
ENSG00000122417	ODF2L	protein_coding	4.51088e-06	0.595286	1.51077	304.059	211.304	283.307	239.826	350.994	366.958	418.193
ENSG00000007237	GAS7	protein_coding	5.65066e-16	0.987894	1.98329	302.055	199.361	200.037	175.461	425.86	338.801	395.254
ENSG00000123496	IL13RA2	protein_coding	6.36679e-11	0.764598	1.6989	299.876	229.678	204.823	233.654	416.137	342.434	398.783
ENSG00000089169	RPH3A	protein_coding	0.000243484	0.825133	1.7717	298.958	164.45	220.137	173.697	280.99	460.515	311.439
ENSG00000183508	FAM46C	protein_coding	2.80638e-14	0.922131	1.89491	295.05	173.637	146.439	173.697	311.131	306.101	336.143
ENSG00000229715	EEF1DP3	transcribed_unprocessed_pseudogene	9.74535e-08	1.29617	2.45576	287.538	122.189	203.866	125.203	287.796	485.947	393.49
ENSG00000083844	ZNF264	protein_coding	5.53315e-18	1.01694	2.02363	282.255	190.174	200.037	170.171	389.885	403.291	357.317
ENSG00000263961	C1orf186	protein_coding	2.97384e-07	0.790478	1.72965	274.866	171.799	241.193	166.644	340.299	351.517	340.554
ENSG00000235385	LINC02154	lincRNA	8.50213e-79	2.43377	5.40304	272.564	90.0339	98.583	113.741	536.7	526.821	587.588
ENSG00000172572	PDE3A	protein_coding	4.83205e-39	1.69564	3.2392	269.77	148.832	146.439	169.289	449.195	511.38	563.767
ENSG00000249645	RP11-552M14.1	lincRNA	1.98969e-22	1.18805	2.27844	261.05	150.669	176.109	156.945	350.994	370.592	395.254
ENSG00000177694	NAALADL2	protein_coding	3.66158e-05	0.590871	1.50616	259.291	174.556	227.794	196.622	282.934	326.084	320.262
ENSG00000230975	AC084193.1	lincRNA	1.87026e-16	1.65129	3.14115	249.685	136.888	172.281	140.192	386.969	550.437	515.242
ENSG00000198795	ZNF521	protein_coding	7.26303e-59	2.26752	4.81495	244.815	98.3023	97.6259	91.6981	414.193	496.847	487.892
ENSG00000162434	JAK1	protein_coding	1.14215e-15	1.07492	2.1066	237.114	137.807	149.31	140.192	288.768	323.359	304.381
ENSG00000249196	RP11-669N7.2	antisense	5.98596e-23	1.55189	2.932	233.9	148.832	99.5401	112.859	396.691	341.526	343.201
ENSG00000148429	USP6NL	protein_coding	1.01285e-08	0.82333	1.76949	230.488	160.775	178.024	149.891	258.627	317.001	310.557
ENSG00000139718	SETD1B	protein_coding	0.00566893	0.63791	1.55607	228.681	182.824	214.394	143.719	252.794	401.474	254.974
ENSG00000072657	TRHDE	protein_coding	1.5152e-20	1.50971	2.84753	228.249	112.083	149.31	125.203	330.576	384.216	407.606
ENSG00000215808	LINC01139	lincRNA	1.58314e-18	1.19721	2.29296	227.867	145.157	148.353	141.956	337.382	340.617	338.789
ENSG00000239039	SNORD13	snoRNA	0.00194657	0.824661	1.77112	227.709	159.856	181.852	140.192	435.583	277.035	222.331
ENSG00000154678	PDE1C	protein_coding	6.92343e-17	1.14949	2.21835	225.325	180.987	216.308	211.611	395.719	465.964	514.36
ENSG00000196387	ZNF140	protein_coding	1.4378e-12	0.916639	1.88771	221.505	158.019	148.353	156.945	258.627	319.726	313.204
ENSG00000102547	CAB39L	protein_coding	4.07873e-10	0.789643	1.72865	220.757	155.263	176.109	152.536	269.322	296.11	287.618
ENSG00000169372	CRADD	protein_coding	0.000204258	0.67989	1.60202	215.967	143.319	159.838	163.999	215.847	300.652	266.444
ENSG00000001036	FUCA2	protein_coding	9.29341e-11	0.853036	1.8063	215.898	173.637	145.482	142.837	258.627	287.935	305.263
ENSG00000228253	MT-ATP8	protein_coding	0.00246437	0.703578	1.62854	215.593	154.344	223.008	141.074	268.35	412.374	228.506
ENSG00000156113	KCNMA1	protein_coding	1.00349e-25	2.15099	4.44132	214.659	48.6918	63.1697	57.3113	195.429	294.293	284.971
ENSG00000248300	RP11-74M11.2	lincRNA	5.11732e-11	1.26855	2.4092	212.109	111.164	145.482	135.784	293.629	297.927	386.432
ENSG00000133106	EPSTI1	protein_coding	3.65845e-07	0.704141	1.62917	206.358	131.376	154.096	153.418	252.794	247.969	233.8
ENSG00000270069	MIR222HG	lincRNA	5.67596e-19	1.36289	2.57199	205.755	116.677	160.796	134.902	321.826	390.574	368.786
ENSG00000106066	CPVL	protein_coding	5.30441e-31	1.43447	2.70283	203.688	120.351	118.682	125.203	353.911	328.809	315.851
ENSG00000123080	CDKN2C	protein_coding	1.26168e-05	0.59484	1.5103	202.454	163.531	167.495	169.289	287.796	239.795	249.681
ENSG00000147206	NXF3	protein_coding	1.58587e-13	1.01094	2.01523	200.43	133.213	138.782	121.676	280.017	257.961	271.737
ENSG00000227863	AC002383.2	lincRNA	6.16784e-07	0.683904	1.60648	200.375	131.376	170.367	141.956	231.403	237.07	262.032
ENSG00000228847	ATP5G2P4	processed_pseudogene	2.14465e-05	0.679005	1.60103	199.762	150.669	134.953	173.697	301.408	220.72	241.74
ENSG00000118689	FOXO3	protein_coding	7.37369e-11	1.08822	2.12612	197.857	96.4649	125.382	121.676	202.235	277.035	271.737
ENSG00000198930	CSAG1	protein_coding	1.26619e-07	0.746488	1.6777	194.983	159.856	175.152	132.257	273.211	260.686	269.973
ENSG00000163040	CCDC74A	protein_coding	4.93011e-16	1.08845	2.12645	194.032	143.319	138.782	130.494	300.435	304.285	289.383
ENSG00000188906	LRRK2	protein_coding	2.92242e-34	1.60649	3.04509	191.961	103.815	99.5401	103.16	327.659	290.66	328.202
ENSG00000138760	SCARB2	protein_coding	8.21459e-12	1.02115	2.02954	189.324	101.977	89.0118	117.268	219.736	186.204	236.447
ENSG00000169715	MT1E	protein_coding	9.57178e-08	1.00947	2.01317	188.907	144.238	133.039	98.7518	308.214	244.336	234.682
ENSG00000250137	RP11-380P13.1	antisense	0.00106966	0.686378	1.60924	185.79	113.002	124.425	137.547	192.512	217.995	231.153
ENSG00000197826	C4orf22	protein_coding	5.82739e-06	0.751725	1.6838	183.444	141.482	180.895	148.128	238.209	302.468	279.678
ENSG00000121858	TNFSF10	protein_coding	4.56859e-06	0.64359	1.56221	181.574	135.97	112.94	123.44	190.567	191.654	216.155
ENSG00000153930	ANKFN1	protein_coding	3.32068e-06	0.81302	1.75689	180.552	113.92	126.339	97.8701	185.706	215.27	215.272
ENSG00000247809	NR2F2-AS1	antisense	2.59254e-12	1.0919	2.13154	179.916	107.489	137.825	115.504	220.708	279.76	286.736
ENSG00000275443	RP11-759A24.3	lincRNA	5.96002e-06	0.962043	1.94807	177.48	113.92	156.01	100.515	201.263	310.643	246.152
ENSG00000198752	CDC42BPB	protein_coding	1.8777e-15	1.20424	2.30415	177.06	112.083	110.068	99.6336	252.794	259.777	245.269
ENSG00000181804	SLC9A9	protein_coding	3.30963e-09	1.12138	2.17555	175.244	76.2532	91.8832	96.9884	167.233	232.528	197.627
ENSG00000283408	RP1-242N11.1	lincRNA	2.06044e-21	1.38833	2.61775	174.532	118.514	142.61	129.612	303.352	398.749	338.789
ENSG00000064225	ST3GAL6	protein_coding	7.66921e-07	0.756559	1.68946	174.281	99.2211	119.64	114.623	173.066	218.903	187.922
ENSG00000183647	ZNF530	protein_coding	7.92766e-07	0.711816	1.63786	172.147	134.132	129.211	122.558	202.235	200.737	247.034
ENSG00000172164	SNTB1	protein_coding	7.49279e-21	1.87402	3.66553	171.688	68.9035	67.9553	75.8273	194.457	335.167	270.855
ENSG00000136147	PHF11	protein_coding	4.26784e-06	0.720641	1.64791	167.383	112.083	126.339	122.558	184.734	210.729	218.802
ENSG00000154645	CHODL	protein_coding	0.000105596	0.716144	1.64279	163.549	101.058	133.996	125.203	158.482	238.886	221.448
ENSG00000104951	IL4I1	protein_coding	9.06556e-08	0.719717	1.64686	162.852	133.213	131.125	142.837	245.015	229.803	213.508
ENSG00000236333	TRHDE-AS1	processed_transcript	5.33552e-20	1.39489	2.62968	162.661	96.4649	104.326	99.6336	245.988	252.511	306.146
ENSG00000115414	FN1	protein_coding	8.6294e-12	0.943911	1.92374	162.141	124.945	112.94	110.214	221.68	234.345	228.506
ENSG00000160505	NLRP4	protein_coding	1.03318e-63	2.6766	6.39346	160.452	61.5538	47.8558	59.9565	379.19	335.167	383.785
ENSG00000256667	KLRA1P	transcribed_unprocessed_pseudogene	0.000951278	0.633909	1.55176	158.883	103.815	132.082	136.666	174.039	225.262	209.979
ENSG00000170624	SGCD	protein_coding	8.3643e-27	2.64048	6.2354	158.862	27.5614	48.8129	35.2685	182.789	274.31	257.621
ENSG00000132530	XAF1	protein_coding	1.69806e-17	1.39018	2.62111	158.201	86.3591	98.583	74.9456	253.766	239.795	202.921
ENSG00000257221	RP11-689B22.2	antisense	4.07813e-21	1.49269	2.81414	157.587	98.3023	102.411	86.4079	317.937	266.136	240.858
ENSG00000171502	COL24A1	protein_coding	1.53887e-06	0.772411	1.70812	155.771	103.815	125.382	126.085	173.066	230.711	222.331
ENSG00000204442	FAM155A	protein_coding	6.43361e-06	0.786924	1.72539	155.632	98.3023	99.5401	106.687	151.676	183.479	209.979
ENSG00000222042	AP000233.4	lincRNA	0.000495121	0.604201	1.52014	155.3	106.571	151.224	115.504	186.678	198.92	206.45
ENSG00000182362	YBEY	protein_coding	5.40113e-06	0.711247	1.63722	154.976	119.433	105.283	142.837	216.819	188.929	217.919
ENSG00000005379	TSPOAP1	protein_coding	1.79525e-75	2.89058	7.4157	150.537	56.0415	62.2126	50.2576	446.278	404.199	411.135
ENSG00000204271	SPIN3	protein_coding	5.50034e-12	1.01449	2.02019	149.617	94.6275	107.197	93.4616	206.124	192.562	211.743
ENSG00000131773	KHDRBS3	protein_coding	1.91806e-06	0.827121	1.77414	149.585	90.0339	127.297	113.741	180.845	191.654	236.447
ENSG00000168491	CCDC110	protein_coding	4.67556e-10	1.04617	2.06504	148.231	97.3836	94.7545	102.279	182.789	202.554	240.858
ENSG00000204920	ZNF155	protein_coding	4.40958e-06	0.761086	1.69477	147.508	103.815	125.382	127.848	207.096	207.095	213.508
ENSG00000007174	DNAH9	protein_coding	5.76137e-11	1.01401	2.01951	147.347	77.1719	93.7974	90.8164	176.955	171.671	194.098
ENSG00000154265	ABCA5	protein_coding	7.37533e-06	0.731716	1.66061	146.392	95.5462	95.7117	104.924	136.12	187.112	186.158
ENSG00000163563	MNDA	protein_coding	3.34831e-10	1.04195	2.05901	146.299	101.058	102.411	144.601	265.433	224.353	249.681
ENSG00000129422	MTUS1	protein_coding	1.58086e-17	1.38004	2.60276	144.351	82.6842	84.2263	76.709	181.817	242.519	223.213
ENSG00000059378	PARP12	protein_coding	6.1541e-05	0.667768	1.58861	143.204	101.058	105.283	120.795	165.288	184.387	190.569
ENSG00000256771	ZNF253	protein_coding	3.1752e-11	1.02188	2.03056	141.039	98.3023	92.8403	96.9884	210.013	190.746	201.156
ENSG00000019991	HGF	protein_coding	6.6377e-44	2.83312	7.12613	140.439	30.3175	37.3275	27.3331	206.124	219.812	261.15
ENSG00000242808	SOX2-OT	sense_overlapping	4.66179e-05	0.66621	1.5869	137.038	90.0339	112.94	87.2896	144.87	176.213	156.161
ENSG00000258123	RP11-314D7.2	lincRNA	0.00173355	0.659909	1.57998	134.222	82.6842	129.211	96.1067	133.203	186.204	197.627
ENSG00000255198	SNHG9	lincRNA	0.00343602	0.676276	1.59801	130.938	121.27	98.583	97.8701	237.237	147.147	164.101
ENSG00000146530	VWDE	protein_coding	1.30197e-06	0.88629	1.84842	129.882	89.1152	83.2691	87.2896	146.815	169.854	182.629
ENSG00000189190	ZNF600	protein_coding	3.22559e-06	0.733274	1.66241	129.855	91.8713	109.111	91.6981	175.011	168.038	159.69
ENSG00000284099	AC008393.1	protein_coding	2.9227e-06	0.831953	1.78009	125.643	98.3023	102.411	88.1713	206.124	174.396	154.396
ENSG00000111666	CHPT1	protein_coding	2.02886e-07	0.92764	1.90216	125.114	82.6842	71.7837	97.8701	145.842	180.754	172.042
ENSG00000182326	C1S	protein_coding	0.000197301	0.687649	1.61066	122.21	111.164	99.5401	83.7627	138.064	173.488	184.393
ENSG00000270344	POC1B-AS1	antisense	0.000160786	0.625007	1.54222	121.213	84.5216	107.197	88.1713	143.898	148.055	156.161
ENSG00000180229	HERC2P3	transcribed_unprocessed_pseudogene	0.000415281	0.727607	1.65589	120.838	67.0661	85.1834	91.6981	116.674	160.771	149.985
ENSG00000277693	AP003900.6	lincRNA	5.59813e-07	1.19364	2.2873	120.476	47.7731	86.1405	69.6553	150.704	183.479	157.043
ENSG00000261799	RP11-283I3.6	sense_overlapping	0.00208957	0.58827	1.50344	120.384	102.896	98.583	76.709	130.286	148.963	161.454
ENSG00000204634	TBC1D8	protein_coding	1.02511e-21	1.83354	3.5641	118.586	61.5538	64.1268	62.6016	217.791	266.136	203.803
ENSG00000163683	SMIM14	protein_coding	3.18155e-08	0.901305	1.86776	117.608	85.4403	100.497	88.1713	186.678	163.496	178.217
ENSG00000267041	ZNF850	protein_coding	3.91862e-06	0.762157	1.69602	117.589	80.8468	88.0547	89.053	139.036	155.321	158.808
ENSG00000159216	RUNX1	protein_coding	1.60671e-08	1.35227	2.55314	116.491	58.7977	74.6551	64.365	141.953	211.637	176.453
ENSG00000163818	LZTFL1	protein_coding	3.55744e-35	2.43804	5.41906	112.432	38.586	50.7272	45.8491	213.902	268.861	263.797
ENSG00000121406	ZNF549	protein_coding	0.000154779	0.694408	1.61822	110.471	89.1152	75.6122	77.5907	127.369	151.688	131.457
ENSG00000185630	PBX1	protein_coding	2.92894e-08	1.06451	2.09147	109.558	68.9035	89.969	77.5907	145.842	197.104	170.277
ENSG00000211632	IGKV3D-11	IG_V_gene	0.0311496	0.66596	1.58662	106.723	83.6029	42.1131	74.9456	200.29	91.7396	82.9328
ENSG00000227579	RP1-35C21.2	lincRNA	5.46692e-14	1.65822	3.15627	106.439	51.448	74.6551	65.2468	162.371	221.628	240.858
ENSG00000139352	ASCL1	protein_coding	6.97058e-22	1.93785	3.83136	102.943	50.5292	42.1131	44.9674	210.013	159.863	172.042
ENSG00000258231	RP11-362K2.2	lincRNA	1.78419e-24	2.9523	7.73983	101.8	20.2117	17.2281	14.9891	108.896	158.955	151.749
ENSG00000126778	SIX1	protein_coding	4.59361e-13	1.30494	2.47074	101.792	69.8222	56.4699	70.537	175.011	170.763	156.161
ENSG00000182168	UNC5C	protein_coding	1.66362e-05	0.789873	1.72892	98.527	90.0339	70.8266	71.4187	140.009	143.513	135.869
ENSG00000231877	RP11-177F15.1	lincRNA	2.05422e-10	1.35677	2.56111	96.9984	44.0982	55.5128	79.3542	144.87	179.846	153.514
ENSG00000010810	FYN	protein_coding	0.00115659	0.660402	1.58052	96.6424	63.3912	66.9982	59.0748	103.062	113.539	100.578
ENSG00000125675	GRIA3	protein_coding	2.61986e-15	1.73657	3.33242	95.6154	60.6351	38.2847	53.7845	184.734	138.972	203.803
ENSG00000167604	NFKBID	protein_coding	0.000488891	0.723092	1.65072	94.4483	97.3836	83.2691	61.7199	151.676	134.43	137.633
ENSG00000175265	GOLGA8A	protein_coding	1.52722e-06	0.899502	1.86542	94.2227	59.7164	67.9553	63.4833	115.702	138.972	116.459
ENSG00000262202	RP11-160E2.6	lincRNA	3.96295e-07	0.941415	1.92041	94.0423	78.0906	74.6551	55.5479	138.064	128.98	148.22
ENSG00000274090	RP11-415G4.1	lincRNA	2.26164e-05	1.034	2.04769	92.5536	36.7485	44.9845	51.1393	70.9767	121.714	97.0491
ENSG00000116977	LGALS8	protein_coding	6.19662e-10	1.20963	2.31278	91.7788	52.3667	52.6414	50.2576	108.896	128.072	134.986
ENSG00000255442	RP11-347H15.1	unprocessed_pseudogene	6.07646e-24	2.23151	4.69626	91.489	34.9111	40.1989	44.9674	158.482	191.654	229.389
ENSG00000248457	LINC02220	lincRNA	0.0019184	0.748052	1.67952	86.9367	77.1719	96.6688	56.4296	111.813	142.605	162.337
ENSG00000153237	CCDC148	protein_coding	4.19098e-15	1.54155	2.91107	86.1311	43.1795	55.5128	45.8491	145.842	138.064	149.103
ENSG00000162174	ASRGL1	protein_coding	0.000334433	0.695993	1.62	85.4341	64.3099	59.3412	71.4187	120.563	108.089	104.989
ENSG00000081052	COL4A4	protein_coding	1.84824e-42	3.50446	11.3487	85.2938	13.7807	14.3567	15.8708	164.316	178.029	169.395
ENSG00000168778	TCTN2	protein_coding	7.04238e-07	0.99285	1.99011	84.2926	70.7409	54.5556	52.9028	132.23	128.98	110.283
ENSG00000186020	ZNF529	protein_coding	0.00373536	0.587417	1.50255	83.8542	56.9602	63.1697	68.7736	102.09	115.356	84.6974
ENSG00000135457	TFCP2	protein_coding	3.4619e-08	1.1953	2.28992	82.3102	39.5047	49.7701	63.4833	117.646	132.614	116.459
ENSG00000187792	ZNF70	protein_coding	0.000939845	0.679783	1.6019	82.0072	62.4725	64.1268	59.9565	94.3114	121.714	100.578
ENSG00000257433	RP1-197B17.3	antisense	0.00152794	0.653796	1.5733	80.9715	48.6918	66.9982	67.0102	85.5609	112.631	106.754
ENSG00000185432	METTL7A	protein_coding	0.00225692	0.677219	1.59905	80.1385	61.5538	51.6843	62.6016	95.2837	91.7396	114.694
ENSG00000135469	COQ10A	protein_coding	0.000939698	0.651301	1.57058	79.6657	58.7977	60.2983	67.8919	101.117	101.731	107.636
ENSG00000250038	RP11-180C1.1	lincRNA	2.95787e-17	1.67169	3.18588	78.9217	46.8544	36.3704	37.9137	133.203	138.064	126.164
ENSG00000148541	FAM13C	protein_coding	3.32044e-06	0.964967	1.95202	77.9474	56.0415	49.7701	57.3113	92.3669	118.081	123.517
ENSG00000139410	SDSL	protein_coding	0.00145168	0.760596	1.69419	77.3955	58.7977	44.0274	73.1822	128.341	83.5648	111.165
ENSG00000102048	ASB9	protein_coding	0.000480134	0.698381	1.62268	77.3705	64.3099	57.427	58.1931	90.4223	107.181	110.283
ENSG00000211625	IGKV3D-20	IG_V_gene	0.00256439	0.641315	1.55975	76.6628	67.0661	55.5128	52.9028	105.979	104.456	82.0506
ENSG00000146409	SLC18B1	protein_coding	1.98604e-09	1.30741	2.47497	76.5239	42.2608	42.1131	46.7308	89.45	122.622	126.164
ENSG00000248109	CTC-295J13.3	protein_coding	0.00246953	0.611946	1.52832	75.4861	67.9848	60.2983	58.1931	93.3392	108.998	99.6958
ENSG00000113296	THBS4	protein_coding	0.00416514	0.618818	1.53562	73.7944	54.2041	50.7272	67.8919	87.5055	108.089	89.1087
ENSG00000184588	PDE4B	protein_coding	0.00415324	0.605921	1.52195	72.4541	53.2854	46.8987	59.0748	81.6718	83.5648	93.52
ENSG00000256725	RP11-662M24.2	lincRNA	0.017585	0.856433	1.81056	71.1262	42.2608	54.5556	28.2148	55.4201	149.872	66.1698
ENSG00000259702	RP11-236L14.1	lincRNA	5.59336e-06	0.930509	1.90595	70.8841	56.0415	45.9416	44.0856	96.256	90.8313	104.989
ENSG00000187950	OVCH1	protein_coding	1.61947e-08	1.40791	2.65352	70.1284	42.2608	45.9416	46.7308	86.5332	145.33	144.691
ENSG00000262660	RP13-1032I1.10	protein_coding	0.00604203	0.680331	1.60251	68.8598	47.7731	52.6414	42.3222	107.923	69.0318	73.2279
ENSG00000196437	ZNF569	protein_coding	0.00169441	0.688901	1.61206	68.4707	45.017	52.6414	51.1393	91.3946	89.0146	75.8747
ENSG00000273993	PTPRK	protein_coding	0.000199658	0.783032	1.72074	68.4388	53.2854	44.9845	47.6125	94.3114	83.5648	88.2264
ENSG00000267382	RP11-325K19.2	transcribed_unprocessed_pseudogene	1.08004e-26	2.40362	5.29129	68.3117	38.586	29.6706	26.4514	149.732	186.204	178.217
ENSG00000214510	SPINK13	protein_coding	0.000172571	0.958706	1.94357	67.6927	35.8298	53.5985	46.7308	79.7272	108.089	96.1668
ENSG00000166603	MC4R	protein_coding	6.03052e-35	3.94025	15.3509	66.9205	11.9433	9.57117	8.81713	159.454	144.422	177.335
ENSG00000214198	TTC41P	transcribed_unitary_pseudogene	0.00688479	0.613349	1.52981	66.8825	44.0982	60.2983	46.7308	74.8658	72.665	101.46
ENSG00000266560	RP11-1007I13.4	processed_transcript	3.28885e-05	0.975426	1.96622	66.7629	43.1795	34.4562	48.4942	101.117	74.4816	89.1087
ENSG00000245904	RP11-796E2.4	antisense	1.93859e-05	0.896398	1.86141	66.4993	45.017	48.8129	62.6016	107.923	105.364	94.4023
ENSG00000157823	AP3S2	protein_coding	0.000939845	0.713306	1.63956	65.9779	53.2854	49.7701	52.0211	107.923	86.2897	77.6392
ENSG00000273112	RP11-25K21.6	processed_transcript	6.56755e-06	1.22948	2.34483	64.993	48.6918	36.3704	44.0856	123.48	118.081	83.8151
ENSG00000261474	RP11-452L6.1	lincRNA	0.00541688	0.602881	1.51875	63.1503	52.3667	63.1697	52.0211	97.2283	91.7396	83.8151
ENSG00000013374	NUB1	protein_coding	0.0014013	0.673798	1.59527	63.0063	59.7164	48.8129	58.1931	97.2283	99.0061	87.3441
ENSG00000204434	POTEKP	unprocessed_pseudogene	1.0567e-06	1.1582	2.23178	62.3071	41.3421	48.8129	28.2148	82.644	98.0978	97.0491
ENSG00000064199	SPA17	protein_coding	0.0136991	0.593868	1.50929	59.3895	56.9602	39.2418	48.4942	81.6718	84.4731	73.2279
ENSG00000100867	DHRS2	protein_coding	1.91987e-17	2.07654	4.21796	58.4857	24.8053	23.9279	30.86	133.203	104.456	111.165
ENSG00000257894	RP1-78O14.1	lincRNA	0.0102967	0.707473	1.63294	57.1341	38.586	46.8987	32.6234	49.5864	91.7396	73.2279
ENSG00000074706	IPCEF1	protein_coding	1.82621e-05	1.01838	2.02564	56.7511	31.2363	38.2847	38.7954	73.8935	74.4816	84.6974
ENSG00000182796	TMEM198B	transcribed_unitary_pseudogene	0.00420782	0.802863	1.74456	54.3524	49.6105	48.8129	31.7417	90.4223	82.6565	78.5215
ENSG00000105708	ZNF14	protein_coding	0.000257144	0.908555	1.87716	53.4543	33.9924	43.0702	30.86	79.7272	69.0318	68.8166
ENSG00000145526	CDH18	protein_coding	0.00102845	0.868489	1.82575	52.8788	40.4234	28.7135	32.6234	70.0044	79.0232	53.8181
ENSG00000136267	DGKB	protein_coding	7.25694e-07	1.53388	2.89564	52.8761	28.4801	21.0566	30.86	58.337	99.0061	93.52
ENSG00000117425	PTCH2	protein_coding	0.0140281	0.663219	1.58361	52.8292	44.0982	34.4562	39.6771	68.0598	56.3154	84.6974
ENSG00000165899	OTOGL	protein_coding	6.27498e-14	1.74659	3.35564	52.6853	33.9924	40.1989	35.2685	121.535	129.889	128.811
ENSG00000101916	TLR8	protein_coding	5.27773e-23	5.27894	38.8256	52.5133	0.918713	3.82847	3.52685	102.09	118.081	122.635
ENSG00000092929	UNC13D	protein_coding	2.40522e-07	1.19452	2.28869	52.3242	33.9924	37.3275	32.6234	87.5055	79.0232	83.8151
ENSG00000277768	CCL3L3	protein_coding	1.09276e-10	1.77193	3.41511	51.4656	33.9924	24.885	34.3868	135.147	99.0061	102.343
ENSG00000197863	ZNF790	protein_coding	0.00055272	0.836557	1.78578	49.8788	33.9924	43.0702	34.3868	61.2538	77.2066	74.9925
ENSG00000156675	RAB11FIP1	protein_coding	0.000198968	0.993953	1.99164	49.8056	29.3988	39.2418	40.5588	76.8103	73.5733	84.6974
ENSG00000164418	GRIK2	protein_coding	0.000234471	1.10281	2.14773	48.9832	19.293	24.885	24.688	42.7804	58.132	60.8762
ENSG00000111012	CYP27B1	protein_coding	0.0195013	0.590048	1.5053	48.8284	45.9357	44.9845	30.86	55.4201	66.3068	80.286
ENSG00000224559	LINC01087	lincRNA	1.26457e-07	1.69229	3.23168	47.3697	22.0491	23.9279	25.5697	58.337	106.273	83.8151
ENSG00000197381	ADARB1	protein_coding	1.09913e-13	2.12086	4.34952	47.3045	22.9678	25.8421	21.1611	95.2837	128.072	95.2845
ENSG00000226397	C12orf77	lincRNA	0.0358475	0.618823	1.53562	46.5447	46.8544	22.0137	31.7417	72.9212	42.6907	64.4053
ENSG00000204147	ASAH2B	protein_coding	0.0041619	0.791193	1.7305	46.4673	31.2363	36.3704	28.2148	49.5864	59.9486	73.2279
ENSG00000101187	SLCO4A1	protein_coding	0.0179272	0.62833	1.54577	45.8066	32.155	41.156	23.8062	46.6696	64.4902	55.5826
ENSG00000259865	RP11-488L18.10	lincRNA	0.0125708	0.641774	1.56025	45.3553	28.4801	33.4991	37.0319	57.3647	54.4988	59.1117
ENSG00000139304	PTPRQ	protein_coding	1.22677e-09	1.62672	3.08809	44.7912	27.5614	36.3704	28.2148	80.6995	104.456	113.812
ENSG00000152785	BMP3	protein_coding	3.66815e-06	1.19718	2.29291	44.0931	37.6673	42.1131	32.6234	93.3392	97.1895	83.8151
ENSG00000226054	MEMO1P1	processed_pseudogene	0.0154953	0.64256	1.5611	43.7625	33.0737	29.6706	27.3331	40.8359	53.5904	61.7585
ENSG00000152503	TRIM36	protein_coding	4.77134e-06	1.26986	2.41138	42.9765	21.1304	27.7564	32.6234	79.7272	65.3985	66.1698
ENSG00000144481	TRPM8	protein_coding	3.82728e-08	1.65805	3.1559	42.682	17.4556	17.2281	18.516	64.1707	56.3154	59.1117
ENSG00000166352	C11orf74	protein_coding	5.79587e-08	1.5009	2.83018	42.3934	24.8053	22.0137	22.0428	69.0321	77.2066	60.8762
ENSG00000108984	MAP2K6	protein_coding	0.00342015	0.794966	1.73504	42.3567	28.4801	30.6277	33.5051	49.5864	72.665	54.7004
ENSG00000248869	RP11-138I17.1	lincRNA	4.1054e-05	1.27507	2.4201	42.3327	22.9678	21.0566	15.8708	44.725	57.2237	55.5826
ENSG00000172123	SLFN12	protein_coding	0.000246437	0.989885	1.98603	41.4501	21.1304	24.885	35.2685	59.3093	59.0403	57.3472
ENSG00000138400	MDH1B	protein_coding	0.000302131	1.04434	2.06243	41.3349	22.9678	27.7564	28.2148	57.3647	49.9572	70.5811
ENSG00000163297	ANTXR2	protein_coding	2.50437e-05	1.21999	2.32945	40.3816	17.4556	21.0566	25.5697	53.4756	54.4988	53.8181
ENSG00000226785	AC073218.1	lincRNA	6.97601e-05	1.21556	2.32231	39.7815	19.293	20.0994	27.3331	47.6419	62.6736	59.1117
ENSG00000164951	PDP1	protein_coding	0.00164576	0.897522	1.86286	39.3074	22.0491	25.8421	29.9782	53.4756	64.4902	42.3487
ENSG00000147912	FBXO10	protein_coding	0.0161286	0.66468	1.58522	39.191	30.3175	31.5848	30.86	70.0044	39.9658	55.5826
ENSG00000280787	HERC2P2	transcribed_unprocessed_pseudogene	0.0127052	0.659824	1.57989	39.088	32.155	22.9708	36.1502	50.5587	52.6821	57.3472
ENSG00000244676	AL109761.5	antisense	0.00107018	1.09874	2.14168	38.7867	22.9678	24.885	20.2794	40.8359	69.0318	53.8181
ENSG00000268104	SLC6A14	protein_coding	7.01992e-06	1.26366	2.40104	38.5	22.0491	26.7993	33.5051	67.0875	65.3985	80.286
ENSG00000169554	ZEB2	protein_coding	0.0116185	0.687933	1.61097	38.3529	24.8053	27.7564	29.0965	43.7527	46.3239	56.4649
ENSG00000259348	RP11-4G2.1	lincRNA	1.60039e-05	1.19601	2.29104	38.2685	22.9678	22.0137	26.4514	54.4478	64.4902	57.3472
ENSG00000171487	NLRP5	protein_coding	3.7599e-19	4.81082	28.0673	38.0529	4.59357	2.87135	1.76343	87.5055	102.639	88.2264
ENSG00000182463	TSHZ2	protein_coding	3.89125e-05	1.56667	2.96219	37.7942	9.18713	17.2281	14.9891	33.0576	67.2151	36.1728
ENSG00000183117	CSMD1	protein_coding	1.46616e-09	2.03097	4.08678	37.7073	10.1058	10.5283	14.9891	48.6141	59.0403	48.5245
ENSG00000169126	ARMC4	protein_coding	1.22594e-05	1.39144	2.62341	37.4332	13.7807	14.3567	14.9891	40.8359	42.6907	39.7019
ENSG00000197635	DPP4	protein_coding	4.70664e-05	1.16875	2.24816	36.7494	30.3175	28.7135	25.5697	65.143	77.2066	63.523
ENSG00000061676	NCKAP1	protein_coding	0.00159219	1.06651	2.09436	36.1711	22.9678	12.4425	12.344	35.9745	38.1491	38.8196
ENSG00000148948	LRRC4C	protein_coding	7.61275e-06	1.48613	2.80136	35.3046	15.6181	21.0566	12.344	43.7527	54.4988	51.1713
ENSG00000080823	MOK	protein_coding	0.00195958	0.916556	1.8876	35.2554	20.2117	22.0137	24.688	39.8636	52.6821	47.6423
ENSG00000112303	VNN2	protein_coding	9.20841e-09	1.93674	3.82838	34.7846	15.6181	10.5283	14.9891	60.2815	64.4902	44.9955
ENSG00000168118	RAB4A	protein_coding	0.000137545	1.20508	2.30551	33.9305	20.2117	16.271	17.6343	52.5033	40.8741	44.1132
ENSG00000197705	KLHL14	protein_coding	2.17211e-11	2.22985	4.69085	33.5615	16.5368	16.271	14.9891	61.2538	93.5562	82.9328
ENSG00000169031	COL4A3	protein_coding	1.61237e-14	2.89938	7.46105	33.2266	8.26842	6.69982	7.93542	55.4201	65.3985	60.8762
ENSG00000136514	RTP4	protein_coding	0.0375323	0.630485	1.54808	32.2042	27.5614	16.271	22.0428	33.0576	34.5159	52.0536
ENSG00000115641	FHL2	protein_coding	0.00723562	0.840448	1.79061	32.0425	24.8053	19.1423	15.8708	47.6419	33.6076	40.5841
ENSG00000276787	FAN1	protein_coding	0.00232692	0.910281	1.87941	31.681	20.2117	22.9708	19.3977	49.5864	38.1491	43.2309
ENSG00000117226	GBP3	protein_coding	0.0342856	0.635078	1.55302	31.6182	27.5614	17.2281	26.4514	35.0022	43.599	50.2891
ENSG00000233527	ZNF529-AS1	antisense	0.0177493	0.679032	1.60107	31.5739	22.0491	22.9708	24.688	39.8636	38.1491	48.5245
ENSG00000114948	ADAM23	protein_coding	1.76588e-05	1.35963	2.56619	31.1997	25.724	14.3567	20.2794	53.4756	62.6736	52.9358
ENSG00000227745	AC098826.5	unprocessed_pseudogene	5.95833e-05	1.57299	2.97521	30.9526	14.6994	19.1423	5.29028	46.6696	38.1491	44.9955
ENSG00000255693	RP11-766N7.3	lincRNA	7.51304e-13	2.57037	5.93963	30.7436	9.18713	14.3567	8.81713	71.9489	66.3068	65.2875
ENSG00000251247	ZNF345	protein_coding	0.0175913	0.742811	1.67343	30.3877	19.293	17.2281	27.3331	36.9467	49.9572	37.0551
ENSG00000183960	KCNH8	protein_coding	0.0179863	0.715373	1.64191	29.754	21.1304	27.7564	23.8062	42.7804	48.1406	45.8777
ENSG00000256582	RP11-75L1.1	lincRNA	0.0127965	0.838914	1.7887	29.5193	18.3743	27.7564	14.9891	33.0576	48.1406	45.8777
ENSG00000122870	BICC1	protein_coding	8.15515e-09	1.94703	3.85579	29.0962	11.0246	15.3139	14.9891	59.3093	51.7738	59.994
ENSG00000110002	VWA5A	protein_coding	0.0339635	0.684474	1.60712	28.8316	15.6181	14.3567	26.4514	39.8636	31.7909	37.0551
ENSG00000136244	IL6	protein_coding	0.000360547	1.08404	2.11996	28.702	20.2117	19.1423	19.3977	47.6419	42.6907	46.76
ENSG00000152207	CYSLTR2	protein_coding	0.00922093	0.784668	1.7227	28.0713	21.1304	17.2281	25.5697	44.725	38.1491	42.3487
ENSG00000257355	CTD-2006C1.10	protein_coding	0.00101187	1.2528	2.38303	26.6786	22.0491	13.3996	17.6343	64.1707	39.9658	41.4664
ENSG00000162552	WNT4	protein_coding	0.00255119	0.923535	1.89676	26.0233	21.1304	22.0137	17.6343	42.7804	42.6907	43.2309
ENSG00000162105	SHANK2	protein_coding	6.66646e-05	1.84611	3.59529	25.9589	7.34971	15.3139	6.17199	35.0022	50.8655	32.6438
ENSG00000282826	FRG1CP	unprocessed_pseudogene	0.0260108	0.702971	1.62785	25.7148	16.5368	21.0566	19.3977	38.8913	35.4242	34.4083
ENSG00000116991	SIPA1L2	protein_coding	1.44475e-11	2.57207	5.94662	25.4091	9.18713	6.69982	9.69884	55.4201	54.4988	53.8181
ENSG00000103490	PYCARD	protein_coding	0.0215851	0.747853	1.67929	24.4193	22.9678	14.3567	15.8708	39.8636	31.7909	33.526
ENSG00000280542	AP000432.4	lincRNA	0.000648295	1.24279	2.36655	23.9412	10.1058	18.1852	9.69884	35.9745	29.9743	35.2906
ENSG00000223750	SIRPB3P	unprocessed_pseudogene	0.00317299	1.17945	2.26491	23.8604	12.862	18.1852	10.5806	23.3348	47.2323	39.7019
ENSG00000139174	PRICKLE1	protein_coding	0.0209182	0.85008	1.8026	23.4443	11.9433	14.3567	14.1074	35.9745	19.0746	33.526
ENSG00000143387	CTSK	protein_coding	0.0383525	0.742422	1.67298	21.8388	14.6994	20.0994	9.69884	30.1408	28.1577	34.4083
ENSG00000169429	CXCL8	protein_coding	3.18423e-12	3.08265	8.47172	21.8259	5.51228	5.7427	7.0537	70.9767	47.2323	50.2891
ENSG00000223949	ROR1-AS1	antisense	0.00266754	1.12075	2.1746	21.6484	17.4556	19.1423	9.69884	39.8636	40.8741	35.2906
ENSG00000134538	SLCO1B1	protein_coding	0.0436368	0.661442	1.58166	21.1839	11.9433	18.1852	14.1074	30.1408	29.9743	24.7034
ENSG00000168661	ZNF30	protein_coding	0.0234442	0.885138	1.84694	20.8785	12.862	14.3567	10.5806	20.4179	39.0574	27.3502
ENSG00000254456	RP11-405K6.1	lincRNA	0.0250605	0.808012	1.7508	20.8765	12.862	13.3996	14.1074	24.3071	28.1577	33.526
ENSG00000259761	RP11-138H10.2	lincRNA	0.00775007	1.14244	2.20755	20.58	5.51228	8.61405	18.516	28.1962	26.3411	33.526
ENSG00000221818	EBF2	protein_coding	0.00917799	1.0267	2.03736	20.1454	10.1058	9.57117	9.69884	30.1408	19.9829	22.0566
ENSG00000269352	PTOV1-AS2	antisense	0.0264454	0.789536	1.72852	20.0434	13.7807	14.3567	11.4623	35.0022	27.2494	21.1743
ENSG00000010278	CD9	protein_coding	0.000262389	1.79493	3.46998	19.5439	5.51228	3.82847	5.29028	22.3625	18.1663	19.4098
ENSG00000243256	RPL30P14	processed_pseudogene	0.00263954	1.188	2.27837	19.4807	13.7807	10.5283	12.344	35.9745	34.5159	27.3502
ENSG00000234464	RP11-136B18.2	lincRNA	0.016902	0.941771	1.92088	19.2402	12.862	12.4425	9.69884	21.3902	37.2408	23.8211
ENSG00000266947	RP11-799D4.4	antisense	0.049805	0.653208	1.57266	18.8764	17.4556	14.3567	11.4623	29.1685	24.5244	29.997
ENSG00000261341	CTD-2568A17.1	protein_coding	0.0150916	0.9485	1.92987	18.8101	11.9433	11.4854	8.81713	31.1131	26.3411	18.5275
ENSG00000163638	ADAMTS9	protein_coding	0.00340257	1.22908	2.34418	17.676	15.6181	8.61405	9.69884	31.1131	29.9743	33.526
ENSG00000178715	RP11-169K16.8	processed_pseudogene	0.0360088	1.00493	2.00685	17.3898	10.1058	1.91423	14.1074	18.4734	18.1663	39.7019
ENSG00000174527	MYO1H	protein_coding	1.30491e-06	2.42197	5.35904	17.1028	2.75614	5.7427	5.29028	28.1962	26.3411	29.1147
ENSG00000268034	AC005795.1	processed_pseudogene	0.000241898	1.95003	3.86382	16.9895	3.67485	7.65693	12.344	54.4478	28.1577	27.3502
ENSG00000282319	CH17-8C20.5	unprocessed_pseudogene	2.71526e-06	1.99055	3.9739	16.0575	9.18713	9.57117	7.0537	38.8913	38.1491	37.0551
ENSG00000179709	NLRP8	protein_coding	1.07306e-06	2.63531	6.21309	15.9775	4.59357	1.91423	8.81713	32.0853	48.1406	29.997
ENSG00000111490	TBC1D30	protein_coding	3.41623e-07	2.6482	6.26886	15.8698	7.34971	1.91423	5.29028	37.919	28.1577	37.9374
ENSG00000172967	XKR3	protein_coding	0.00428805	1.30702	2.47431	15.6076	7.34971	5.7427	7.0537	21.3902	19.0746	20.2921
ENSG00000198178	CLEC4C	protein_coding	0.00378321	1.26223	2.39866	15.2918	5.51228	11.4854	7.0537	22.3625	24.5244	22.0566
ENSG00000104213	PDGFRL	protein_coding	0.0105524	1.33092	2.51564	15.2742	5.51228	1.91423	7.93542	23.3348	12.7164	14.9985
ENSG00000258131	RP11-541G9.1	lincRNA	0.0234566	0.885195	1.84701	14.858	8.26842	12.4425	13.2257	27.2239	27.2494	23.8211
ENSG00000173572	NLRP13	protein_coding	3.95332e-05	2.19223	4.57013	14.7133	3.67485	12.4425	2.64514	33.0576	29.066	37.0551
ENSG00000112299	VNN1	protein_coding	9.46055e-06	2.71822	6.58063	14.4519	1.83743	0.957117	6.17199	28.1962	19.9829	22.9389
ENSG00000115616	SLC9A2	protein_coding	0.000147806	1.98827	3.9676	13.6394	8.26842	2.87135	3.52685	21.3902	21.7995	25.5857
ENSG00000046653	GPM6B	protein_coding	0.00596451	1.6242	3.08271	13.6374	3.67485	1.91423	7.93542	8.75055	28.1577	18.5275
ENSG00000226364	LINC02089	lincRNA	0.0269635	1.00718	2.00998	13.5106	7.34971	7.65693	7.0537	9.72283	23.6161	25.5857
ENSG00000271576	RP11-486G15.2	lincRNA	0.0479684	0.802588	1.74423	12.8948	10.1058	5.7427	7.93542	16.5288	23.6161	16.763
ENSG00000140876	NUDT7	protein_coding	0.00636519	1.28608	2.43865	12.6011	8.26842	8.61405	7.93542	19.4457	29.9743	25.5857
ENSG00000235838	HSP90AB7P	processed_pseudogene	0.0228542	1.24767	2.37458	12.544	4.59357	11.4854	2.64514	16.5288	32.6993	14.1162
ENSG00000185792	NLRP9	protein_coding	1.39916e-08	4.10804	17.2442	12.4291	0	1.91423	3.52685	37.919	39.0574	33.526
ENSG00000277448	RP11-538C21.2	lincRNA	0.000503979	1.87359	3.66444	12.2272	5.51228	2.87135	8.81713	17.5011	29.9743	29.1147
ENSG00000281508	CDR1-AS	antisense	0.00282447	1.70571	3.26189	11.8887	6.43099	8.61405	0.881713	22.3625	24.5244	18.5275
ENSG00000253524	RP11-89M20.2	lincRNA	0.0135807	1.42277	2.68099	11.6672	3.67485	6.69982	2.64514	11.6674	22.7078	13.234
ENSG00000196549	MME	protein_coding	0.00962392	1.36467	2.57517	11.4353	2.75614	5.7427	7.93542	20.4179	14.533	20.2921
ENSG00000171885	AQP4	protein_coding	0.00550415	1.47187	2.77382	11.3784	4.59357	5.7427	7.0537	14.5842	19.9829	26.4679
ENSG00000180875	GREM2	protein_coding	0.000116291	2.39566	5.26218	10.4513	4.59357	1.91423	3.52685	25.2794	15.4413	23.8211
ENSG00000198732	SMOC1	protein_coding	3.90291e-05	2.30258	4.93339	10.2991	3.67485	2.87135	6.17199	24.3071	27.2494	22.9389
ENSG00000235643	LINC01647	lincRNA	0.0354376	0.994535	1.99244	10.1617	6.43099	3.82847	7.93542	17.5011	15.4413	18.5275
ENSG00000168530	MYL1	protein_coding	0.00635388	1.60578	3.0436	9.81614	5.51228	1.91423	4.40856	16.5288	10.8998	20.2921
ENSG00000259527	LINC00052	lincRNA	0.0359246	0.998869	1.99843	9.54147	4.59357	7.65693	7.0537	16.5288	20.8912	17.6453
ENSG00000134533	RERG	protein_coding	0.0162201	1.27474	2.41955	9.07158	4.59357	2.87135	7.0537	14.5842	16.3496	16.763
ENSG00000155816	FMN2	protein_coding	0.00144988	2.03765	4.10576	8.3217	3.67485	0.957117	4.40856	14.5842	17.2579	15.8808
ENSG00000249464	LINC01091	lincRNA	0.0166857	1.37653	2.59643	8.29887	2.75614	4.78558	6.17199	7.77826	18.1663	23.8211
ENSG00000264345	LINC01894	lincRNA	0.000999134	3.35079	10.202	8.27644	0.918713	0	1.76343	10.6951	8.17481	21.1743
ENSG00000222041	CYTOR	lincRNA	0.00877516	1.69262	3.23243	8.01249	3.67485	2.87135	3.52685	14.5842	20.8912	9.70491
ENSG00000237515	SHISA9	protein_coding	0.000423954	2.50553	5.67858	7.58875	1.83743	2.87135	2.64514	16.5288	19.9829	16.763
ENSG00000197077	KIAA1671	protein_coding	0.0158014	1.36188	2.57021	7.54435	3.67485	5.7427	5.29028	13.612	22.7078	15.8808
ENSG00000197321	SVIL	protein_coding	0.0446917	0.996144	1.99466	7.39287	2.75614	5.7427	4.40856	10.6951	11.8081	16.763
ENSG00000254487	RP11-707M1.7	unprocessed_pseudogene	0.0357913	1.12447	2.18022	7.28773	2.75614	2.87135	5.29028	12.6397	9.99144	13.234
ENSG00000143355	LHX9	protein_coding	0.0101294	3.0264	8.14776	7.06466	0	0.957117	0.881713	5.8337	14.533	5.29358
ENSG00000081913	PHLPP1	protein_coding	0.0273924	1.33126	2.51622	6.98622	3.67485	3.82847	2.64514	15.5565	17.2579	6.17585
ENSG00000013588	GPRC5A	protein_coding	0.00935611	1.66475	3.17059	6.97241	1.83743	3.82847	4.40856	18.4734	12.7164	13.234
ENSG00000175356	SCUBE2	protein_coding	0.0449038	0.99081	1.9873	6.80917	5.51228	2.87135	5.29028	12.6397	16.3496	13.234
ENSG00000136546	SCN7A	protein_coding	0.0271433	1.1767	2.2606	6.66628	4.59357	5.7427	4.40856	15.5565	12.7164	19.4098
ENSG00000106541	AGR2	protein_coding	0.00103714	4.36569	20.6159	6.04725	0	0	0.881713	11.6674	11.8081	11.4694
ENSG00000211598	IGKV4-1	IG_V_gene	0.0158872	1.92711	3.80293	5.47404	1.83743	0.957117	2.64514	13.612	9.08313	10.5872
ENSG00000111732	AICDA	protein_coding	0.00517254	2.12075	4.34919	5.11358	1.83743	1.91423	3.52685	15.5565	12.7164	16.763
ENSG00000223638	RFPL4A	protein_coding	0.0498997	1.33057	2.51502	5.02114	0.918713	2.87135	0.881713	13.612	5.44988	7.05811
ENSG00000078295	ADCY2	protein_coding	0.0474873	1.20747	2.30932	4.80877	1.83743	0	5.29028	9.72283	10.8998	10.5872
ENSG00000213117	RP3-352A20.1	processed_pseudogene	0.0193749	2.36472	5.15052	4.2815	1.83743	0.957117	0	7.77826	6.35819	11.4694
ENSG00000197769	MAP1LC3C	protein_coding	0.0080507	3.25103	9.52045	3.34594	0.918713	0.957117	0	9.72283	8.17481	12.3517

## Sheet: DOWN FC1.5 Tat vs control
ensID	gene_name	gene_type	padj	log2FC	FC	mean count	LCL.1	LCL.2	LCL.3	Tat.1	Tat.2	Tat.3
ENSG00000114200	BCHE	protein_coding	9.82108e-19	-0.601098	0.659252	5459.47	6103.01	6249.01	7058.99	4127.34	4127.37	4441.32
ENSG00000196126	HLA-DRB1	protein_coding	1.65301e-14	-0.827508	0.563502	3168.79	4011.1	3499.22	3942.14	2349.04	1843.87	2175.66
ENSG00000198502	HLA-DRB5	protein_coding	2.39165e-10	-0.745308	0.596541	3085.46	3874.21	3260.9	3855.73	2415.15	1884.75	2137.73
ENSG00000179344	HLA-DQB1	protein_coding	6.85687e-16	-0.589639	0.664509	3025.87	3612.38	3222.61	3488.94	2338.34	2147.25	2308.89
ENSG00000132465	JCHAIN	protein_coding	1.46398e-08	-0.715	0.609205	2704.98	2885.68	2418.63	2958.15	1683.02	1505.98	1737.18
ENSG00000196735	HLA-DQA1	protein_coding	4.4397e-41	-0.806676	0.571697	2337.7	2881.09	2754.58	2643.38	1570.24	1562.3	1576.61
ENSG00000185352	HS6ST3	protein_coding	3.13525e-07	-0.730695	0.602613	2142.48	2421.73	3044.59	2844.41	1318.42	1770.3	1785.7
ENSG00000253377	RP11-566H8.3	lincRNA	6.42007e-07	-0.858358	0.55158	1751.51	2004.63	2628.24	2010.31	895.473	1359.74	1274.87
ENSG00000133104	SPG20	protein_coding	8.51521e-26	-0.630921	0.645764	1730.27	2039.54	2022.39	2113.47	1290.22	1317.05	1351.63
ENSG00000254119	RP11-705O24.1	lincRNA	9.85281e-16	-1.40244	0.378289	1623.69	1800.68	2236.78	1983.85	593.093	728.467	895.498
ENSG00000206120	EGFEM1P	transcribed_unitary_pseudogene	4.92918e-11	-1.16465	0.446071	1519.52	1830.08	2404.28	1957.4	700.044	973.711	1001.37
ENSG00000196890	HIST3H2BB	protein_coding	1.20027e-07	-0.606126	0.656959	1518.96	1899.9	1693.14	1727.28	1286.33	1025.49	1116.95
ENSG00000134324	LPIN1	protein_coding	2.92343e-18	-0.616048	0.652456	1459.87	1684.92	1806.08	1753.73	1066.59	1198.97	1128.42
ENSG00000148935	GAS2	protein_coding	4.96704e-44	-1.39775	0.379519	1405.18	1811.7	2089.39	1877.17	635.873	755.716	779.921
ENSG00000102879	CORO1A	protein_coding	1.13403e-23	-0.813018	0.56919	1363.01	1874.18	1632.84	1751.08	1049.09	908.313	1010.19
ENSG00000171714	ANO5	protein_coding	5.49665e-33	-0.794469	0.576555	1334.13	1717.99	1754.39	1767.83	933.392	1011.86	1053.42
ENSG00000167460	TPM4	protein_coding	3.08059e-35	-0.979213	0.507256	1332.97	1756.58	1538.09	1657.62	869.221	796.59	827.564
ENSG00000182459	TEX19	protein_coding	1.76886e-89	-1.8701	0.273555	1329.62	2003.71	1721.85	1885.98	549.34	472.323	506.42
ENSG00000188404	SELL	protein_coding	9.68825e-60	-1.20357	0.4342	1328.7	1811.7	1651.03	1803.98	786.577	719.384	769.334
ENSG00000165164	CFAP47	protein_coding	9.53093e-06	-0.667186	0.629734	1196.92	1151.15	1334.22	1341.09	625.178	848.364	858.443
ENSG00000151812	SLC35F4	protein_coding	1.27235e-05	-0.850109	0.554743	1178.73	1172.28	1662.51	1388.7	548.368	836.556	848.738
ENSG00000173482	PTPRM	protein_coding	7.42821e-06	-0.792673	0.577273	1172.99	1294.47	1706.54	1419.56	643.651	902.863	901.674
ENSG00000121966	CXCR4	protein_coding	2.07704e-12	-0.588172	0.665185	1135.21	1412.98	1245.21	1381.64	964.505	847.456	847.856
ENSG00000161888	SPC24	protein_coding	1.55987e-07	-0.650984	0.636846	1112.02	1401.96	1291.15	1488.33	986.867	772.974	845.209
ENSG00000251381	LINC00958	lincRNA	9.44598e-23	-0.680448	0.623972	1003.09	1148.39	1078.67	1088.03	684.487	670.335	698.753
ENSG00000125255	SLC10A2	protein_coding	1.37838e-49	-1.17171	0.443896	987.214	1326.62	1221.28	1322.57	610.594	513.197	584.059
ENSG00000068366	ACSL4	protein_coding	9.06402e-37	-1.15648	0.448606	975.115	1238.43	1223.2	1267.02	474.474	607.661	574.354
ENSG00000172575	RASGRP1	protein_coding	2.92996e-12	-0.632311	0.645142	967.885	1165.85	1297.85	1275.84	757.408	810.215	815.212
ENSG00000116701	NCF2	protein_coding	4.14334e-07	-0.595123	0.661988	962.664	1352.35	1180.12	1282.01	905.195	800.223	768.452
ENSG00000113448	PDE4D	protein_coding	3.78572e-26	-1.78452	0.290272	962.458	1279.77	1655.81	1401.92	320.853	483.222	428.78
ENSG00000129151	BBOX1	protein_coding	1.04382e-50	-1.23576	0.424618	955.005	1279.77	1321.78	1456.59	545.451	552.254	613.174
ENSG00000253666	KB-1615E4.2	antisense	1.93296e-31	-0.80376	0.572854	913.479	1114.4	1146.63	1180.61	639.762	661.252	658.169
ENSG00000267761	CTD-2130O13.1	lincRNA	4.49429e-08	-1.12613	0.458143	895.693	911.364	1287.32	802.359	350.022	499.572	466.718
ENSG00000106034	CPED1	protein_coding	1.32987e-12	-0.783173	0.581087	837.971	1102.46	1124.61	980.465	537.672	618.561	676.697
ENSG00000065308	TRAM2	protein_coding	3.2276e-09	-0.681127	0.623678	836.115	789.175	872.89	720.359	410.303	540.446	503.773
ENSG00000035403	VCL	protein_coding	9.53394e-22	-0.710988	0.610902	834.012	1047.33	991.573	974.293	644.624	573.145	608.762
ENSG00000271955	RP11-444A22.1	lincRNA	3.37378e-79	-3.02529	0.122828	803.225	1228.32	1527.56	1364.89	126.397	178.029	194.98
ENSG00000105339	DENND3	protein_coding	1.78419e-24	-0.840476	0.558459	799.051	1077.65	1129.4	1130.36	609.621	645.81	591.999
ENSG00000064655	EYA2	protein_coding	1.04088e-07	-0.85962	0.551098	784.184	894.827	1205.01	972.529	489.058	649.444	500.244
ENSG00000183530	PRR14L	protein_coding	1.0666e-09	-0.646233	0.638946	755.18	883.802	1014.54	833.219	537.672	640.36	536.417
ENSG00000104332	SFRP1	protein_coding	9.16922e-20	-0.650826	0.636915	740.426	962.812	932.232	949.605	622.261	577.687	598.175
ENSG00000143153	ATP1B1	protein_coding	4.96154e-38	-0.995239	0.501653	729.098	883.802	912.132	841.154	441.416	445.982	426.134
ENSG00000231772	RP1-154K9.2	lincRNA	8.32596e-53	-9.36641	0.00151506	726.168	1151.15	1442.37	1233.52	0.972283	2.72494	1.76453
ENSG00000140563	MCTP2	protein_coding	3.7171e-09	-0.84083	0.558322	671.619	773.557	826.949	858.788	376.273	495.03	465.835
ENSG00000115548	KDM3A	protein_coding	2.30323e-08	-0.672125	0.627581	663.585	745.077	812.592	861.434	426.832	531.363	527.594
ENSG00000048540	LMO3	protein_coding	2.60543e-07	-0.696053	0.617259	663.334	789.175	875.762	945.196	473.502	482.314	614.056
ENSG00000007944	MYLIP	protein_coding	2.59786e-31	-1.11146	0.462826	639.522	847.054	853.748	828.81	363.634	394.208	400.548
ENSG00000119900	OGFRL1	protein_coding	2.80448e-13	-0.606325	0.656868	636.726	708.328	742.722	711.542	465.724	441.44	497.597
ENSG00000150893	FREM2	protein_coding	5.86927e-167	-6.1633	0.0139528	628.797	1108.89	1169.6	1180.61	21.3902	13.6247	13.234
ENSG00000225760	LINC00431	transcribed_unprocessed_pseudogene	3.03124e-174	-6.1984	0.0136175	622.022	1162.17	1353.36	1273.19	15.5565	19.0746	16.763
ENSG00000227681	RP11-307P5.1	lincRNA	4.47552e-10	-1.16913	0.444691	621.526	720.271	984.873	741.521	300.435	414.191	335.26
ENSG00000172893	DHCR7	protein_coding	1.28433e-09	-0.664277	0.631005	614.303	750.589	707.309	741.521	505.587	409.649	449.955
ENSG00000092820	EZR	protein_coding	1.50385e-16	-0.884534	0.541662	612.998	763.451	697.738	805.886	444.333	361.508	405.841
ENSG00000100097	LGALS1	protein_coding	1.39137e-13	-0.884526	0.541666	602.765	802.956	700.609	789.133	431.694	370.592	418.193
ENSG00000038427	VCAN	protein_coding	3.79207e-22	-1.01103	0.496193	550.044	685.36	783.878	726.531	331.548	356.967	386.432
ENSG00000025039	RRAGD	protein_coding	2.42626e-66	-1.51531	0.34982	543.617	835.111	834.606	843.799	263.489	310.643	297.323
ENSG00000058453	CROCC	protein_coding	4.53822e-10	-0.732303	0.601942	533.377	715.678	615.426	697.435	437.527	365.142	396.137
ENSG00000183605	SFXN4	protein_coding	3.31951e-10	-0.620913	0.650259	531	553.065	599.155	638.36	407.387	347.884	392.608
ENSG00000215146	RP11-313J2.1	transcribed_unprocessed_pseudogene	8.00671e-44	-1.40026	0.378861	529.126	716.596	765.693	779.434	262.516	274.31	311.439
ENSG00000136960	ENPP2	protein_coding	3.61656e-25	-0.902325	0.535024	527.266	695.466	680.51	654.231	366.551	353.334	355.552
ENSG00000082805	ERC1	protein_coding	0.000256651	-0.598306	0.660529	522.883	570.521	700.609	544.899	305.297	458.698	388.196
ENSG00000156515	HK1	protein_coding	1.33924e-13	-0.734463	0.601042	516.919	652.287	580.013	682.446	413.22	351.517	371.433
ENSG00000100557	C14orf105	protein_coding	3.46882e-61	-1.82247	0.282737	514.333	754.264	903.518	747.693	210.985	227.078	235.565
ENSG00000196353	CPNE4	protein_coding	4.84432e-05	-0.70055	0.615338	499.807	553.065	702.524	615.436	321.826	401.474	381.138
ENSG00000169860	P2RY1	protein_coding	2.59497e-35	-1.19323	0.437322	499.095	650.449	662.325	757.391	280.99	297.018	318.497
ENSG00000135540	NHSL1	protein_coding	1.36485e-18	-1.08722	0.470667	479.448	628.4	695.824	615.436	280.017	336.076	281.442
ENSG00000082482	KCNK2	protein_coding	1.41148e-19	-1.1186	0.46054	464.09	534.691	661.368	602.21	238.209	297.018	278.795
ENSG00000113946	CLDN16	protein_coding	3.74131e-11	-0.8469	0.555978	462.481	553.984	678.596	618.962	343.216	331.534	333.496
ENSG00000181577	C6orf223	protein_coding	2.12946e-31	-1.3032	0.405226	456.823	712.922	647.011	714.187	314.047	246.153	270.855
ENSG00000251088	RP11-325B23.2	lincRNA	0.000145729	-0.63033	0.646029	454.27	512.642	632.654	554.597	287.796	388.758	380.256
ENSG00000257642	KCCAT198	antisense	1.51822e-19	-1.27264	0.413901	454.268	548.472	671.896	603.092	222.653	277.944	239.094
ENSG00000150394	CDH8	protein_coding	1.35408e-81	-2.77887	0.145706	452.697	721.19	860.448	805.004	98.2006	119.897	125.282
ENSG00000214189	ZNF788	protein_coding	2.17433e-10	-0.601797	0.658933	450.294	576.033	517.8	569.587	375.301	367.867	338.789
ENSG00000056736	IL17RB	protein_coding	2.07305e-11	-0.653335	0.635809	442.221	562.253	556.085	598.683	356.828	357.875	361.728
ENSG00000069702	TGFBR3	protein_coding	3.47356e-18	-0.882526	0.542417	441.162	538.366	562.785	542.253	265.433	311.551	301.734
ENSG00000074964	ARHGEF10L	protein_coding	2.7842e-09	-0.639083	0.642121	434.459	530.098	550.342	467.308	307.241	346.975	322.026
ENSG00000168405	CMAHP	processed_transcript	2.4415e-12	-0.663929	0.631157	413.107	484.162	506.315	497.286	289.74	297.927	337.907
ENSG00000004864	SLC25A13	protein_coding	1.0666e-09	-0.782696	0.581279	412.726	497.943	574.27	553.716	268.35	336.984	318.497
ENSG00000167851	CD300A	protein_coding	5.18771e-12	-0.726287	0.604458	401.713	482.325	429.745	483.179	287.796	266.136	277.031
ENSG00000166387	PPFIBP2	protein_coding	3.84673e-08	-0.665983	0.630259	398.45	456.601	537.9	432.039	281.962	317.001	280.56
ENSG00000071794	HLTF	protein_coding	1.87933e-24	-1.05019	0.482904	397.895	474.056	530.243	544.017	266.406	219.812	253.21
ENSG00000188580	NKAIN2	protein_coding	1.80497e-29	-1.85158	0.277089	392.709	480.487	655.625	590.748	139.036	162.588	167.63
ENSG00000164574	GALNT10	protein_coding	1.53586e-08	-0.719641	0.607249	383.457	450.17	518.757	408.233	248.904	292.477	275.266
ENSG00000131389	SLC6A6	protein_coding	8.08042e-15	-0.784457	0.58057	380.821	430.877	483.344	473.48	244.043	277.035	272.62
ENSG00000141441	GAREM1	protein_coding	1.97956e-05	-0.623025	0.649308	380.073	443.739	469.944	452.319	260.572	325.176	273.502
ENSG00000141968	VAV1	protein_coding	9.7524e-17	-0.966991	0.511572	378.843	483.243	491.001	544.017	302.38	234.345	229.389
ENSG00000112773	FAM46A	protein_coding	2.82849e-31	-1.32141	0.400143	372.559	518.154	576.184	601.328	207.096	229.803	232.918
ENSG00000196562	SULF2	protein_coding	8.31513e-148	-4.06474	0.0597575	370.617	697.303	686.253	650.704	37.919	43.599	39.7019
ENSG00000125910	S1PR4	protein_coding	8.3424e-13	-0.808904	0.570815	368.569	525.504	477.601	444.383	301.408	250.694	261.15
ENSG00000216863	LY86-AS1	antisense	1.35246e-23	-1.41947	0.373851	366.613	472.219	586.712	572.232	176.955	214.362	207.332
ENSG00000131979	GCH1	protein_coding	1.46974e-08	-0.614161	0.65331	366.356	474.056	436.445	469.071	300.435	301.56	284.089
ENSG00000102962	CCL22	protein_coding	5.00506e-19	-1.40861	0.376676	364.353	651.368	696.781	489.351	248.904	232.528	194.98
ENSG00000012124	CD22	protein_coding	2.06044e-21	-1.0285	0.490221	361.596	480.487	471.858	507.867	221.68	249.786	234.682
ENSG00000162636	FAM102B	protein_coding	4.48245e-11	-0.688493	0.620502	352.303	425.364	443.145	436.448	239.182	288.843	268.208
ENSG00000154330	PGM5	protein_coding	3.74391e-14	-0.830236	0.562437	349.614	408.827	398.161	447.028	216.819	239.795	237.329
ENSG00000167306	MYO5B	protein_coding	6.79206e-09	-0.940324	0.521116	336.024	399.64	455.587	424.986	201.263	237.978	207.332
ENSG00000185904	LINC00839	lincRNA	2.49958e-62	-1.87674	0.272297	332.952	507.13	472.816	486.706	130.286	126.255	139.398
ENSG00000117322	CR2	protein_coding	3.9809e-14	-0.876031	0.544864	324.92	372.998	391.461	395.889	213.902	197.104	210.861
ENSG00000080166	DCT	protein_coding	1.73034e-35	-1.40056	0.378783	324.046	380.347	441.231	426.749	145.842	170.763	150.867
ENSG00000242741	LINC02005	lincRNA	1.6457e-20	-1.43767	0.369162	324.004	364.729	491.958	409.997	124.452	150.78	181.746
ENSG00000169508	GPR183	protein_coding	2.85116e-09	-0.716493	0.608575	323.135	384.022	327.334	423.222	242.098	206.187	229.389
ENSG00000113140	SPARC	protein_coding	1.86559e-29	-1.2675	0.415379	322.874	458.438	406.775	403.825	162.371	168.038	189.687
ENSG00000143333	RGS16	protein_coding	2.08445e-09	-0.75538	0.59239	319.277	360.136	352.219	336.814	218.764	177.121	212.626
ENSG00000125848	FLRT3	protein_coding	7.56453e-68	-2.2702	0.207301	317.381	456.601	499.615	532.555	87.5055	109.906	107.636
ENSG00000198734	F5	protein_coding	4.05526e-20	-1.88483	0.270776	317.064	412.502	493.872	388.835	71.9489	147.147	120.87
ENSG00000118515	SGK1	protein_coding	7.98494e-62	-2.3602	0.194764	309.537	570.521	541.728	518.447	124.452	89.0146	101.46
ENSG00000129353	SLC44A2	protein_coding	3.33819e-10	-0.709628	0.611478	307.315	365.648	373.275	395.889	232.376	232.528	217.037
ENSG00000174837	ADGRE1	protein_coding	7.40786e-08	-0.7086	0.611914	306.727	427.202	382.847	393.244	242.098	220.72	255.857
ENSG00000189108	IL1RAPL2	protein_coding	0.000609242	-0.603677	0.658075	300.29	296.744	425.917	350.04	187.651	220.72	264.679
ENSG00000160712	IL6R	protein_coding	1.11456e-13	-0.810613	0.570139	296.742	353.705	374.233	342.986	194.457	214.362	192.334
ENSG00000111728	ST8SIA1	protein_coding	3.70897e-28	-1.27298	0.413803	296.39	373.916	435.488	411.76	157.51	178.938	162.337
ENSG00000172456	FGGY	protein_coding	6.36326e-15	-1.54952	0.341624	292.256	392.291	510.143	429.394	108.896	172.579	158.808
ENSG00000005844	ITGAL	protein_coding	1.06576e-11	-0.779271	0.582661	286.96	340.843	358.919	379.137	200.29	217.087	200.274
ENSG00000180828	BHLHE22	protein_coding	1.54476e-15	-0.898304	0.536517	284.138	419.852	382.847	418.814	235.292	199.829	210.861
ENSG00000196172	ZNF681	protein_coding	1.5581e-13	-0.883057	0.542217	283.274	364.729	369.447	409.997	221.68	199.829	188.805
ENSG00000101439	CST3	protein_coding	7.69709e-08	-0.617053	0.652002	281.488	405.153	340.734	342.105	242.098	225.262	228.506
ENSG00000169760	NLGN1	protein_coding	1.15395e-59	-2.84262	0.139408	279.46	390.453	480.473	495.523	45.6973	71.7567	69.6989
ENSG00000277263	HLA-DRA	protein_coding	2.75358e-09	-0.663497	0.631346	279.261	327.062	320.634	310.363	199.318	194.379	200.274
ENSG00000137266	SLC22A23	protein_coding	0.00089024	-0.649459	0.637519	270.148	295.826	379.975	287.438	154.593	232.528	193.216
ENSG00000105122	RASAL3	protein_coding	3.55301e-20	-1.00484	0.498326	268.759	358.298	372.318	348.277	185.706	178.938	166.748
ENSG00000228918	LINC01344	lincRNA	1.77567e-71	-5.55217	0.0213123	262.947	428.12	642.225	433.803	11.6674	14.533	5.29358
ENSG00000092421	SEMA6A	protein_coding	9.2765e-05	-0.793246	0.577044	262.064	320.631	410.603	284.793	169.177	202.554	183.511
ENSG00000182054	IDH2	protein_coding	2.19248e-06	-0.670499	0.628289	256.092	348.192	320.634	372.083	194.457	198.012	242.623
ENSG00000090104	RGS1	protein_coding	7.66749e-17	-1.12306	0.459119	254.931	374.835	332.119	412.642	167.233	155.321	181.746
ENSG00000068024	HDAC4	protein_coding	0.013912	-0.61321	0.653741	253.151	248.971	414.431	263.632	132.23	253.419	163.219
ENSG00000156269	NAA11	protein_coding	7.84532e-13	-1.12251	0.459293	247.391	324.306	395.289	316.535	134.175	176.213	152.632
ENSG00000179455	MKRN3	protein_coding	8.4081e-22	-1.14245	0.45299	246.288	316.037	321.591	330.642	145.842	155.321	131.457
ENSG00000157303	SUSD3	protein_coding	1.57087e-13	-0.887278	0.540633	243.975	316.037	306.277	321.825	177.928	153.505	170.277
ENSG00000133985	TTC9	protein_coding	4.49736e-14	-0.932379	0.523994	241.199	304.094	346.476	298.901	171.122	168.946	149.985
ENSG00000251432	RP11-420A23.1	lincRNA	1.55353e-07	-0.97633	0.508271	237.691	258.158	333.077	270.686	103.062	170.763	146.456
ENSG00000160888	IER2	protein_coding	6.51068e-13	-0.819578	0.566608	235.428	334.412	311.063	331.524	175.011	176.213	193.216
ENSG00000014257	ACPP	protein_coding	2.42144e-21	-1.36528	0.388159	234.957	277.451	278.521	364.147	113.757	123.531	113.812
ENSG00000005471	ABCB4	protein_coding	1.19986e-29	-1.91029	0.266038	232.466	301.338	325.42	398.534	75.8381	93.5562	97.9313
ENSG00000183032	SLC25A21	protein_coding	9.92941e-36	-2.06994	0.23817	232.034	247.134	240.236	256.578	44.725	58.132	70.5811
ENSG00000156265	MAP3K7CL	protein_coding	4.08058e-13	-0.982029	0.506267	230.376	282.964	297.663	340.341	153.621	169.854	133.222
ENSG00000225530	SP3P	processed_pseudogene	2.69175e-07	-0.656472	0.634428	226.761	239.784	267.036	268.922	168.205	144.422	166.748
ENSG00000144749	LRIG1	protein_coding	3.03933e-21	-1.59822	0.330283	223.643	302.257	397.203	356.212	100.145	143.513	97.0491
ENSG00000171914	TLN2	protein_coding	1.33607e-07	-0.793597	0.576904	221.681	286.639	342.648	310.363	152.648	181.663	191.451
ENSG00000235823	OLMALINC	lincRNA	5.00271e-12	-0.904507	0.534215	220.157	297.663	299.577	327.115	165.288	156.23	162.337
ENSG00000176659	C20orf197	lincRNA	1.90922e-22	-1.23237	0.425617	217.05	289.395	306.277	308.6	116.674	138.064	123.517
ENSG00000183230	CTNNA3	protein_coding	0.00291941	-0.590423	0.664148	215.784	214.06	268.95	266.277	116.674	180.754	171.159
ENSG00000102271	KLHL4	protein_coding	5.21264e-05	-0.618404	0.651391	214.659	222.329	248.85	252.17	139.036	154.413	161.454
ENSG00000107551	RASSF4	protein_coding	2.02838e-14	-1.03071	0.489469	211.73	315.119	267.036	253.933	141.953	119.897	139.398
ENSG00000163519	TRAT1	protein_coding	6.82081e-09	-0.973283	0.509346	211.716	213.142	231.622	287.438	108.896	119.897	132.34
ENSG00000105612	DNASE2	protein_coding	5.99001e-05	-0.614056	0.653357	208.78	254.484	200.994	260.987	166.26	122.622	164.101
ENSG00000011590	ZBTB32	protein_coding	8.88892e-10	-0.746178	0.596181	207.54	280.208	278.521	282.148	171.122	169.854	149.985
ENSG00000102935	ZNF423	protein_coding	6.52691e-72	-4.91344	0.0331824	205.541	346.355	439.317	342.986	10.6951	10.8998	14.9985
ENSG00000186469	GNG2	protein_coding	1.25692e-06	-0.724739	0.605107	205.434	248.971	305.32	290.965	137.092	178.029	179.982
ENSG00000150967	ABCB9	protein_coding	2.01072e-07	-0.698332	0.616284	200.315	265.508	241.193	256.578	158.482	138.064	162.337
ENSG00000233067	PTCHD1-AS	lincRNA	3.30963e-09	-1.00985	0.496598	198.934	171.799	218.223	206.321	80.6995	93.5562	112.048
ENSG00000196139	AKR1C3	protein_coding	1.00585e-79	-4.91838	0.033069	198.128	369.323	389.546	371.201	8.75055	9.99144	17.6453
ENSG00000205213	LGR4	protein_coding	2.66236e-09	-0.833909	0.561007	193.967	241.622	252.679	217.783	119.591	128.072	141.162
ENSG00000152104	PTPN14	protein_coding	2.8168e-67	-3.8256	0.070531	190.726	303.175	399.118	306.836	23.3348	26.3411	20.2921
ENSG00000177182	CLVS1	protein_coding	3.01767e-05	-0.720519	0.606879	185.621	201.198	263.207	234.536	133.203	138.064	135.869
ENSG00000213096	ZNF254	protein_coding	7.1208e-53	-2.38817	0.191024	184.432	283.882	334.034	285.675	60.2815	56.3154	53.8181
ENSG00000138685	FGF2	protein_coding	1.34144e-05	-0.626656	0.647676	184.201	213.142	216.308	193.977	110.84	149.872	130.575
ENSG00000229981	LINC01435	lincRNA	0.000138506	-0.82563	0.564236	177.657	170.881	280.435	229.245	95.2837	137.155	128.811
ENSG00000231304	SGO1-AS1	processed_transcript	9.15111e-22	-1.67604	0.312941	177.223	216.816	302.449	280.385	76.8103	89.923	77.6392
ENSG00000110693	SOX6	protein_coding	2.81993e-09	-1.33462	0.396498	175.011	172.718	231.622	205.439	71.9489	69.9401	89.1087
ENSG00000149782	PLCB3	protein_coding	1.58578e-06	-0.690094	0.619813	174.607	211.304	213.437	216.02	132.23	132.614	120.87
ENSG00000198954	KIF1BP	protein_coding	8.12397e-05	-0.636299	0.643361	174.536	237.947	191.423	219.547	141.953	136.247	124.399
ENSG00000121898	CPXM2	protein_coding	1.93557e-36	-2.10526	0.23241	173.8	269.183	324.463	293.61	57.3647	84.4731	60.8762
ENSG00000127863	TNFRSF19	protein_coding	5.3361e-64	-3.26441	0.104068	173.479	289.395	314.891	327.997	27.2239	32.6993	35.2906
ENSG00000235142	RP1-60O19.1	lincRNA	1.92598e-38	-7.02447	0.00768109	169.725	319.712	322.548	367.674	2.91685	2.72494	1.76453
ENSG00000136286	MYO1G	protein_coding	7.37171e-21	-1.39259	0.380881	166.443	234.272	229.708	250.406	79.7272	86.2897	100.578
ENSG00000181274	FRAT2	protein_coding	2.44315e-05	-0.655951	0.634657	165.135	174.556	205.78	223.073	125.424	133.522	111.165
ENSG00000198286	CARD11	protein_coding	1.25939e-12	-1.22279	0.428453	164.916	240.703	291.921	223.955	103.062	125.347	86.4619
ENSG00000248774	RP11-798M19.3	antisense	7.61336e-06	-0.636163	0.643422	162.92	192.011	204.823	208.966	138.064	129.889	111.165
ENSG00000243694	LINC02027	lincRNA	4.72287e-26	-1.96122	0.256811	161.987	228.76	267.036	249.525	47.6419	79.0232	59.994
ENSG00000129595	EPB41L4A	protein_coding	7.77328e-19	-1.64943	0.318766	157.462	214.06	244.065	236.299	62.2261	80.8398	72.3457
ENSG00000059377	TBXAS1	protein_coding	1.10111e-29	-1.86899	0.273766	157.143	213.142	247.893	236.299	54.4478	72.665	59.994
ENSG00000133135	RNF128	protein_coding	5.00517e-17	-1.19858	0.435704	155.981	203.036	204.823	222.192	81.6718	94.4645	92.6377
ENSG00000170011	MYRIP	protein_coding	2.55123e-12	-1.65487	0.317567	150.747	208.548	304.363	208.966	50.5587	102.639	66.1698
ENSG00000233005	AC067959.1	lincRNA	1.27939e-26	-2.25271	0.20983	150.712	207.629	282.349	209.848	38.8913	45.4156	58.2294
ENSG00000186352	ANKRD37	protein_coding	3.92196e-05	-0.853133	0.553581	150.582	225.085	182.809	200.149	115.702	127.164	76.757
ENSG00000133138	TBC1D8B	protein_coding	1.41451e-16	-1.32851	0.398179	150.385	229.678	188.552	245.116	82.644	88.1063	87.3441
ENSG00000062282	DGAT2	protein_coding	2.96567e-07	-0.891023	0.539232	149.186	209.467	187.595	193.977	121.535	98.0978	88.2264
ENSG00000116191	RALGPS2	protein_coding	0.000519202	-0.597042	0.661108	149.021	163.531	180.895	205.439	104.034	131.705	112.048
ENSG00000106688	SLC1A1	protein_coding	9.55167e-16	-1.45916	0.363704	147.575	216.816	256.507	225.719	74.8658	93.5562	78.5215
ENSG00000163347	CLDN1	protein_coding	4.13868e-11	-1.23544	0.424712	146.162	180.987	192.38	221.31	72.9212	94.4645	76.757
ENSG00000225457	RP11-736E3.1	processed_transcript	2.80859e-05	-0.760132	0.590442	146.161	159.856	194.295	186.041	81.6718	117.172	105.872
ENSG00000242444	RP11-320N7.1	transcribed_processed_pseudogene	1.84595e-13	-1.14526	0.452109	145.65	185.58	216.308	208.084	103.062	81.7481	84.6974
ENSG00000167476	JSRP1	protein_coding	0.000119827	-0.618048	0.651552	145.461	159.856	180.895	204.557	122.508	103.548	116.459
ENSG00000233154	LINC01762	lincRNA	5.40746e-09	-1.35578	0.390723	145.264	192.93	250.765	136.666	69.0321	79.0232	67.9343
ENSG00000105355	PLIN3	protein_coding	0.00073319	-0.597196	0.661037	144.263	161.694	154.096	169.289	103.062	92.6479	109.401
ENSG00000149809	TM7SF2	protein_coding	1.90132e-08	-0.867586	0.548063	143.581	184.661	162.71	183.396	103.062	92.6479	87.3441
ENSG00000254006	RP11-1D12.2	lincRNA	4.25065e-36	-2.15492	0.224546	141.957	237.028	235.451	280.385	45.6973	59.9486	59.994
ENSG00000221887	HMSD	protein_coding	1.35824e-08	-0.883294	0.542128	141.638	187.418	212.48	201.912	97.2283	97.1895	121.752
ENSG00000162896	PIGR	protein_coding	0.00164819	-0.628113	0.647022	140.833	242.54	182.809	256.578	146.815	114.447	155.278
ENSG00000225179	LINC00457	lincRNA	2.643e-44	-5.62202	0.020305	139.043	222.329	240.236	245.998	3.88913	5.44988	4.41132
ENSG00000216775	RP1-152L7.5	transcribed_unprocessed_pseudogene	1.0445e-09	-1.08961	0.469889	138.866	164.45	166.538	162.235	75.8381	60.857	87.3441
ENSG00000180096	SEPT1	protein_coding	7.93278e-11	-1.02932	0.489943	134.681	190.174	164.624	179.869	89.45	88.1063	77.6392
ENSG00000116771	AGMAT	protein_coding	1.0817e-06	-0.892552	0.53866	134.129	193.849	156.967	149.891	97.2283	86.2897	75.8747
ENSG00000184564	SLITRK6	protein_coding	2.58067e-34	-2.22019	0.214613	133.409	212.223	192.38	219.547	45.6973	36.3325	49.4068
ENSG00000263563	UBBP4	transcribed_unprocessed_pseudogene	2.23714e-08	-1.53521	0.345028	133.402	147.913	113.897	132.257	51.531	35.4242	41.4664
ENSG00000126752	SSX1	protein_coding	3.24991e-15	-8.39809	0.00296431	131.842	240.703	241.193	246.88	0.972283	0	0.882264
ENSG00000237356	AL163953.3	processed_transcript	0.000998422	-0.730177	0.60283	130.511	129.539	211.523	136.666	80.6995	102.639	85.5796
ENSG00000148053	NTRK2	protein_coding	2.40181e-12	-1.12448	0.458666	130.324	175.474	203.866	177.224	88.4777	73.5733	86.4619
ENSG00000147138	GPR174	protein_coding	5.24798e-05	-0.671077	0.628038	129.353	150.669	151.224	145.483	83.6163	104.456	82.0506
ENSG00000083290	ULK2	protein_coding	9.19432e-10	-1.16397	0.446283	129.108	151.588	167.495	156.063	56.3924	85.3814	62.6408
ENSG00000064687	ABCA7	protein_coding	2.23948e-05	-0.730273	0.60279	129.024	173.637	194.295	158.708	108.896	99.9144	96.1668
ENSG00000168404	MLKL	protein_coding	5.02167e-14	-1.28062	0.411619	126.418	166.287	164.624	186.041	79.7272	64.4902	63.523
ENSG00000125810	CD93	protein_coding	2.60718e-54	-5.16851	0.027805	125.524	257.24	246.936	277.74	4.86141	9.99144	6.17585
ENSG00000277734	TRAC	TR_C_gene	1.03431e-09	-1.32281	0.399755	125.468	203.954	167.495	196.622	77.7826	50.8655	89.1087
ENSG00000232053	AC009784.3	lincRNA	1.03188e-05	-0.977688	0.507793	125.066	142.401	176.109	202.794	58.337	97.1895	94.4023
ENSG00000143195	ILDR2	protein_coding	1.93254e-05	-0.857397	0.551947	122.824	146.075	132.082	147.246	52.5033	89.0146	81.1683
ENSG00000174233	ADCY6	protein_coding	5.9657e-05	-0.677319	0.625326	121.733	143.319	153.139	129.612	88.4777	88.1063	79.4038
ENSG00000184867	ARMCX2	protein_coding	5.32846e-49	-5.23332	0.0265835	121.515	226.004	222.051	265.396	5.8337	6.35819	6.17585
ENSG00000182632	CCNYL2	transcribed_unprocessed_pseudogene	1.34923e-35	-6.3661	0.0121231	121.309	243.459	240.236	235.417	1.94457	3.63325	2.64679
ENSG00000108370	RGS9	protein_coding	1.71812e-05	-0.710265	0.611208	121.064	146.994	176.109	180.751	90.4223	107.181	98.8136
ENSG00000267257	RP11-1151B14.4	antisense	7.94073e-16	-1.37949	0.384354	120.096	187.418	159.838	174.579	60.2815	66.3068	68.8166
ENSG00000260027	HOXB7	protein_coding	0.00431749	-0.641358	0.641109	119.431	150.669	130.168	135.784	99.1729	64.4902	84.6974
ENSG00000007933	FMO3	protein_coding	8.61094e-32	-2.10168	0.232986	116.086	175.474	190.466	205.439	42.7804	46.3239	41.4664
ENSG00000144962	SPATA16	protein_coding	3.42438e-26	-1.73899	0.299578	116.039	187.418	186.638	196.622	52.5033	58.132	57.3472
ENSG00000204161	C10orf128	protein_coding	3.73611e-09	-1.048	0.483637	115.745	142.401	153.139	116.386	65.143	68.1235	59.1117
ENSG00000177606	JUN	protein_coding	0.00527551	-0.60817	0.656028	114.462	192.011	140.696	126.967	112.785	89.923	78.5215
ENSG00000145850	TIMD4	protein_coding	5.27125e-11	-1.32847	0.398191	113.981	149.75	137.825	143.719	57.3647	52.6821	55.5826
ENSG00000118507	AKAP7	protein_coding	5.06097e-07	-0.952312	0.516804	112.462	148.832	151.224	143.719	72.9212	85.3814	61.7585
ENSG00000198796	ALPK2	protein_coding	1.48761e-09	-1.03448	0.488193	112.326	146.075	156.967	136.666	69.0321	65.3985	73.2279
ENSG00000164841	TMEM74	protein_coding	2.79922e-17	-1.54469	0.34277	111.332	144.238	159.838	155.181	43.7527	48.1406	60.8762
ENSG00000176697	BDNF	protein_coding	7.0488e-18	-1.54693	0.342238	110.734	165.368	171.324	159.59	52.5033	60.857	52.0536
ENSG00000158813	EDA	protein_coding	1.31676e-24	-2.11273	0.231208	110.239	145.157	186.638	169.289	30.1408	40.8741	41.4664
ENSG00000250775	RP11-12K22.1	lincRNA	1.361e-08	-1.06569	0.477744	108.261	129.539	133.996	119.913	54.4478	59.0403	62.6408
ENSG00000225329	LHFPL3-AS2	processed_transcript	3.81878e-22	-1.84045	0.279236	106.62	168.125	160.796	163.999	45.6973	52.6821	36.1728
ENSG00000236453	AC003092.1	lincRNA	2.74731e-35	-2.59383	0.165645	106.231	175.474	223.008	180.751	31.1131	28.1577	34.4083
ENSG00000233836	RP11-255H23.2	transcribed_unprocessed_pseudogene	3.47726e-35	-3.10635	0.116117	105.04	165.368	164.624	222.192	12.6397	27.2494	22.0566
ENSG00000238121	LINC00426	lincRNA	1.13924e-07	-0.97543	0.508588	104.785	124.026	131.125	137.547	65.143	68.1235	59.1117
ENSG00000143248	RGS5	protein_coding	0.000376384	-0.651374	0.636673	104.412	112.083	124.425	127.848	60.2815	77.2066	82.9328
ENSG00000242759	LINC00882	lincRNA	3.81813e-08	-1.1934	0.43727	103.405	89.1152	126.339	96.9884	39.8636	49.9572	40.5841
ENSG00000213846	AC098614.2	transcribed_processed_pseudogene	2.15056e-05	-0.833008	0.561358	103.377	120.351	109.111	134.902	70.9767	61.7653	62.6408
ENSG00000009790	TRAF3IP3	protein_coding	3.99088e-07	-0.920348	0.528382	102.856	114.839	121.554	132.257	60.2815	67.2151	59.994
ENSG00000205744	DENND1C	protein_coding	0.00020917	-0.725544	0.604769	101.357	120.351	127.297	111.096	66.1152	68.1235	71.4634
ENSG00000118407	FILIP1	protein_coding	2.64022e-07	-1.09711	0.467453	101.011	117.595	155.053	152.536	51.531	58.132	79.4038
ENSG00000053254	FOXN3	protein_coding	4.61364e-20	-2.18282	0.220245	100.925	110.246	150.267	127.848	24.3071	34.5159	23.8211
ENSG00000225546	LVCAT5	lincRNA	2.19228e-07	-1.21082	0.432024	100.318	117.595	148.353	141.956	38.8913	50.8655	76.757
ENSG00000135074	ADAM19	protein_coding	8.30956e-19	-1.65853	0.316762	99.5484	158.019	156.01	139.311	52.5033	40.8741	46.76
ENSG00000169220	RGS14	protein_coding	4.28249e-05	-0.831256	0.56204	98.7473	166.287	133.039	134.02	87.5055	70.8484	73.2279
ENSG00000114268	PFKFB4	protein_coding	2.28798e-11	-1.34394	0.393943	98.5818	148.832	131.125	179.869	61.2538	66.3068	47.6423
ENSG00000258760	CTD-2509G16.5	lincRNA	6.97554e-06	-0.931883	0.524174	97.9045	119.433	172.281	161.353	68.0598	79.9315	77.6392
ENSG00000214595	EML6	protein_coding	0.000376384	-0.733275	0.601537	95.9824	99.2211	109.111	108.451	51.531	67.2151	60.8762
ENSG00000155792	DEPTOR	protein_coding	1.79036e-21	-1.92898	0.262614	95.3673	132.295	131.125	141.956	25.2794	43.599	34.4083
ENSG00000172264	MACROD2	protein_coding	5.62098e-30	-2.61369	0.163381	95.168	141.482	159.838	144.601	27.2239	27.2494	16.763
ENSG00000175395	ZNF25	protein_coding	0.000141079	-0.734313	0.601104	94.4348	116.677	119.64	132.257	71.9489	77.2066	61.7585
ENSG00000187266	EPOR	protein_coding	0.000364097	-0.659936	0.632906	94.07	116.677	115.811	117.268	76.8103	70.8484	63.523
ENSG00000162627	SNX7	protein_coding	0.000234116	-0.746018	0.596247	91.3474	112.083	89.0118	124.322	64.1707	56.3154	63.523
ENSG00000188177	ZC3H6	protein_coding	4.36229e-05	-0.875156	0.545195	91.322	117.595	128.254	148.128	69.0321	70.8484	63.523
ENSG00000160606	TLCD1	protein_coding	7.16658e-05	-0.766334	0.58791	88.8762	114.839	108.154	96.1067	57.3647	67.2151	53.8181
ENSG00000072201	LNX1	protein_coding	5.93233e-24	-2.2777	0.206226	87.4826	143.319	178.981	159.59	32.0853	34.5159	29.997
ENSG00000106780	MEGF9	protein_coding	0.000670259	-0.692933	0.618595	87.0908	91.8713	114.854	108.451	64.1707	54.4988	65.2875
ENSG00000103187	COTL1	protein_coding	1.01135e-37	-4.00138	0.0624403	87.0122	153.425	186.638	176.343	12.6397	11.8081	7.05811
ENSG00000128872	TMOD2	protein_coding	5.47776e-05	-0.767266	0.58753	85.1614	102.896	121.554	125.203	68.0598	63.5819	64.4053
ENSG00000144824	PHLDB2	protein_coding	5.75641e-29	-2.61422	0.163321	84.5355	124.945	156.967	140.192	18.4734	21.7995	26.4679
ENSG00000125845	BMP2	protein_coding	5.63491e-07	-0.949998	0.517633	84.3517	112.083	113.897	107.569	55.4201	60.857	49.4068
ENSG00000154328	NEIL2	protein_coding	0.00291941	-0.672049	0.627615	83.6835	100.14	94.7545	130.494	79.7272	48.1406	62.6408
ENSG00000259674	RP11-356M20.1	processed_pseudogene	6.31912e-07	-1.03075	0.489454	82.9879	119.433	104.326	142.837	47.6419	59.9486	63.523
ENSG00000137880	GCHFR	protein_coding	0.00127062	-0.663575	0.631312	82.833	99.2211	90.9261	110.214	68.0598	50.8655	59.994
ENSG00000054277	OPN3	protein_coding	7.32459e-14	-1.75633	0.296	82.3121	133.213	124.425	111.978	21.3902	41.7824	41.4664
ENSG00000177301	KCNA2	protein_coding	0.000232219	-0.920466	0.528338	81.9314	90.9526	129.211	89.053	46.6696	53.5904	51.1713
ENSG00000236591	RP11-162J8.3	antisense	2.13318e-05	-0.879511	0.543552	81.8592	95.5462	107.197	132.257	59.3093	60.857	52.9358
ENSG00000143494	VASH2	protein_coding	2.74988e-08	-1.16291	0.44661	81.4604	108.408	118.682	101.397	37.919	61.7653	40.5841
ENSG00000152767	FARP1	protein_coding	1.44195e-13	-1.65079	0.318465	81.2058	99.2211	146.439	132.257	40.8359	36.3325	38.8196
ENSG00000225205	AC093818.1	antisense	8.01082e-10	-1.35075	0.392088	81.0313	118.514	116.768	103.16	28.1962	44.5073	53.8181
ENSG00000104081	BMF	protein_coding	0.00116472	-0.678323	0.624891	80.2875	100.14	79.4407	118.15	51.531	59.9486	63.523
ENSG00000136250	AOAH	protein_coding	0.00591806	-0.605214	0.657374	80.2684	84.5216	96.6688	84.6444	45.6973	62.6736	53.8181
ENSG00000225519	RP11-236B18.2	lincRNA	2.2168e-11	-1.32352	0.39956	78.5077	142.401	118.682	131.375	43.7527	52.6821	54.7004
ENSG00000167216	KATNAL2	protein_coding	4.20462e-09	-1.13898	0.45408	78.3349	107.489	125.382	116.386	53.4756	44.5073	54.7004
ENSG00000255733	IFNG-AS1	antisense	3.25138e-05	-0.966493	0.511749	78.0767	81.7655	107.197	93.4616	35.9745	55.4071	44.1132
ENSG00000137491	SLCO2B1	protein_coding	5.92927e-16	-1.78065	0.291053	77.7308	140.563	147.396	116.386	27.2239	44.5073	41.4664
ENSG00000283052	RP11-210L7.3	lincRNA	2.6445e-07	-1.3323	0.397134	76.1993	74.4158	117.725	96.9884	29.1685	34.5159	44.1132
ENSG00000132704	FCRL2	protein_coding	9.35725e-08	-1.08812	0.470373	76.1429	97.3836	112.94	119.913	48.6141	51.7738	48.5245
ENSG00000273079	GRIN2B	protein_coding	1.99915e-10	-1.36975	0.386957	75.6191	97.3836	129.211	107.569	45.6973	39.0574	39.7019
ENSG00000134532	SOX5	protein_coding	2.20624e-05	-0.940248	0.521143	75.5766	78.0906	95.7117	107.569	41.8082	44.5073	52.0536
ENSG00000179930	ZNF648	protein_coding	4.2785e-29	-5.32697	0.0249128	75.1628	135.051	145.482	148.128	3.88913	3.63325	2.64679
ENSG00000188649	CC2D2B	protein_coding	0.000525384	-0.927968	0.525598	74.2579	71.6596	100.497	110.214	35.0022	48.1406	52.9358
ENSG00000171234	UGT2B7	protein_coding	0.00249198	-0.653664	0.635664	73.9478	78.0906	111.026	111.096	55.4201	65.3985	57.3472
ENSG00000134955	SLC37A2	protein_coding	5.14519e-09	-1.35258	0.39159	73.6268	102.896	92.8403	133.139	38.8913	37.2408	46.76
ENSG00000235335	AC016723.4	antisense	1.17842e-28	-3.08836	0.117574	72.9165	135.97	142.61	109.332	8.75055	20.8912	14.1162
ENSG00000108381	ASPA	protein_coding	0.00057464	-0.70959	0.611494	72.5716	96.4649	95.7117	110.214	54.4478	58.132	61.7585
ENSG00000257703	RP11-328J6.1	lincRNA	2.49115e-25	-3.17689	0.110576	72.466	90.0339	120.597	126.967	9.72283	13.6247	12.3517
ENSG00000162654	GBP4	protein_coding	0.00130998	-0.686435	0.621387	72.4019	89.1152	79.4407	85.5262	55.4201	40.8741	52.0536
ENSG00000158079	PTPDC1	protein_coding	8.00025e-06	-0.950485	0.517458	72.1383	88.1965	88.0547	94.3433	36.9467	40.8741	54.7004
ENSG00000176771	NCKAP5	protein_coding	6.56655e-23	-2.72492	0.151257	70.9453	113.002	135.911	122.558	12.6397	25.4328	15.8808
ENSG00000169245	CXCL10	protein_coding	2.29838e-07	-1.41048	0.376185	70.291	75.3345	47.8558	74.0639	26.2516	17.2579	26.4679
ENSG00000147180	ZNF711	protein_coding	3.16856e-13	-1.67206	0.313804	69.927	124.026	102.411	103.16	39.8636	33.6076	26.4679
ENSG00000271860	RP11-436D23.1	lincRNA	1.3356e-14	-1.7951	0.288151	69.5112	97.3836	118.682	134.02	26.2516	38.1491	32.6438
ENSG00000263327	TAPT1-AS1	antisense	0.00316732	-0.624547	0.648623	69.3556	79.9281	86.1405	94.3433	56.3924	45.4156	56.4649
ENSG00000020577	SAMD4A	protein_coding	1.97186e-09	-1.68263	0.311514	68.7202	92.7901	135.911	96.9884	34.0299	31.7909	29.997
ENSG00000231043	AC007238.1	processed_pseudogene	0.00524686	-0.646133	0.638991	68.6618	70.7409	101.454	81.9993	51.531	51.7738	46.76
ENSG00000100024	UPB1	protein_coding	9.89001e-07	-1.10765	0.464049	68.066	112.083	89.0118	102.279	51.531	46.3239	36.1728
ENSG00000102043	MTMR8	protein_coding	2.81401e-07	-1.17781	0.442021	68.0181	102.896	96.6688	105.806	32.0853	44.5073	51.1713
ENSG00000118292	C1orf54	protein_coding	0.00195463	-0.768111	0.587186	66.2218	87.2778	81.3549	76.709	52.5033	30.8826	49.4068
ENSG00000124615	MOCS1	protein_coding	4.54045e-05	-0.902825	0.534838	65.8758	96.4649	87.0976	75.8273	48.6141	40.8741	41.4664
ENSG00000052126	PLEKHA5	protein_coding	2.68576e-09	-1.30748	0.404027	64.8621	88.1965	89.969	104.042	30.1408	39.9658	38.8196
ENSG00000167799	NUDT8	protein_coding	0.000174101	-0.855997	0.552483	64.8483	80.8468	72.7409	76.709	35.0022	44.5073	39.7019
ENSG00000121552	CSTA	protein_coding	8.56521e-05	-1.1358	0.455081	64.643	119.433	84.2263	82.881	49.5864	24.5244	45.8777
ENSG00000154162	CDH12	protein_coding	6.28159e-17	-2.87349	0.136456	63.8743	58.7977	70.8266	62.6016	7.77826	9.08313	7.94038
ENSG00000226476	LINC01748	lincRNA	6.93288e-20	-5.91361	0.0165893	63.6557	98.3023	146.439	117.268	1.94457	1.81663	1.76453
ENSG00000123700	KCNJ2	protein_coding	8.85983e-16	-1.95819	0.257351	63.5166	102.896	103.369	101.397	21.3902	28.1577	26.4679
ENSG00000233928	RP11-305F18.1	lincRNA	0.0110397	-0.632493	0.645061	63.3614	64.3099	91.8832	74.9456	37.919	40.8741	56.4649
ENSG00000140015	KCNH5	protein_coding	3.9454e-24	-4.34835	0.0490925	62.8662	96.4649	115.811	104.924	6.80598	5.44988	2.64679
ENSG00000163689	C3orf67	protein_coding	1.49696e-09	-1.62267	0.324735	62.1988	90.9526	111.983	92.5799	29.1685	22.7078	38.8196
ENSG00000141622	RNF165	protein_coding	0.00154521	-0.869983	0.547153	61.8659	85.4403	91.8832	78.4724	30.1408	57.2237	39.7019
ENSG00000198142	SOWAHC	protein_coding	0.000183846	-1.03101	0.489368	61.4368	115.758	66.9982	91.6981	54.4478	31.7909	37.9374
ENSG00000235947	EGOT	lincRNA	0.00708437	-0.592371	0.663252	60.2865	92.7901	77.5264	77.5907	55.4201	47.2323	50.2891
ENSG00000233006	AC034220.3	processed_transcript	0.000172303	-0.912243	0.531358	58.522	64.3099	85.1834	82.881	37.919	47.2323	29.997
ENSG00000144476	ACKR3	protein_coding	6.10333e-12	-2.01904	0.246722	57.9344	99.2211	77.5264	95.225	31.1131	17.2579	15.8808
ENSG00000078401	EDN1	protein_coding	3.30963e-09	-1.49485	0.354818	57.8129	92.7901	77.5264	90.8164	26.2516	30.8826	30.8792
ENSG00000148942	SLC5A12	protein_coding	2.67061e-27	-4.61417	0.0408315	57.8056	100.14	124.425	130.494	2.91685	5.44988	5.29358
ENSG00000125731	SH2D3A	protein_coding	0.0138324	-0.619017	0.651114	57.6402	88.1965	67.9553	59.9565	35.0022	45.4156	46.76
ENSG00000156535	CD109	protein_coding	2.48385e-05	-0.963353	0.512864	57.3104	82.6842	81.3549	77.5907	37.919	44.5073	34.4083
ENSG00000158715	SLC45A3	protein_coding	0.00400506	-0.645231	0.63939	57.3028	72.5784	96.6688	78.4724	45.6973	52.6821	48.5245
ENSG00000250033	SLC7A11-AS1	processed_transcript	0.000114037	-0.951468	0.517106	57.1999	55.1228	75.6122	59.9565	31.1131	31.7909	29.1147
ENSG00000138411	HECW2	protein_coding	0.000475751	-0.847315	0.555818	57.0903	58.7977	65.0839	74.9456	30.1408	38.1491	34.4083
ENSG00000253125	RP11-459E5.1	processed_transcript	0.00840491	-0.587162	0.665651	56.9971	78.0906	69.8695	71.4187	49.5864	49.0489	37.0551
ENSG00000122188	LAX1	protein_coding	1.96259e-05	-1.1398	0.453823	55.8096	69.8222	62.2126	91.6981	34.0299	24.5244	36.1728
ENSG00000171587	DSCAM	protein_coding	1.84661e-18	-5.75079	0.0185712	55.6174	81.7655	142.61	102.279	1.94457	0.908313	2.64679
ENSG00000229618	AC011288.2	lincRNA	1.60533e-15	-2.21609	0.215224	55.568	94.6275	101.454	111.978	21.3902	24.5244	17.6453
ENSG00000267509	CTD-2043I16.1	lincRNA	2.92996e-12	-1.84885	0.277614	55.4532	78.0906	91.8832	100.515	25.2794	17.2579	29.1147
ENSG00000120594	PLXDC2	protein_coding	0.0060269	-0.69751	0.616636	55.3992	65.2287	56.4699	50.2576	36.9467	29.9743	29.997
ENSG00000050730	TNIP3	protein_coding	2.28595e-10	-1.70926	0.305818	54.8818	84.5216	73.698	79.3542	26.2516	16.3496	26.4679
ENSG00000267327	CTD-2008L17.1	lincRNA	3.78707e-05	-1.14509	0.452162	54.0377	51.448	64.1268	74.9456	19.4457	31.7909	28.2325
ENSG00000153233	PTPRR	protein_coding	1.18218e-07	-1.39323	0.380712	53.5459	87.2778	81.3549	94.3433	29.1685	20.8912	44.1132
ENSG00000185046	ANKS1B	protein_coding	0.0263401	-0.644027	0.639924	53.1202	42.2608	57.427	64.365	20.4179	38.1491	32.6438
ENSG00000224565	LINC01754	lincRNA	5.74402e-05	-0.989862	0.503526	52.998	79.9281	76.5693	99.6336	46.6696	36.3325	37.9374
ENSG00000197085	NPSR1-AS1	processed_transcript	1.23509e-12	-2.08646	0.235457	52.7288	71.6596	105.283	81.9993	15.5565	23.6161	18.5275
ENSG00000231671	LINC01307	lincRNA	0.00091644	-0.811081	0.569955	52.7265	67.9848	67.9553	81.1176	31.1131	37.2408	45.8777
ENSG00000184307	ZDHHC23	protein_coding	0.00421495	-0.719252	0.607412	51.997	70.7409	58.3841	59.0748	29.1685	32.6993	42.3487
ENSG00000230107	CTA-126B4.7	lincRNA	0.00183015	-0.757876	0.591366	50.5969	62.4725	68.9124	79.3542	44.725	35.4242	35.2906
ENSG00000168959	GRM5	protein_coding	5.97781e-06	-1.19305	0.437376	50.1794	65.2287	77.5264	73.1822	30.1408	29.9743	28.2325
ENSG00000074370	ATP2A3	protein_coding	8.0759e-18	-2.72548	0.151199	50.163	67.9848	77.5264	77.5907	10.6951	11.8081	9.70491
ENSG00000223850	MYCNUT	lincRNA	1.15163e-21	-4.67601	0.0391183	50.0788	96.4649	100.497	79.3542	2.91685	5.44988	1.76453
ENSG00000152465	NMT2	protein_coding	0.000294774	-0.906554	0.533458	49.2822	56.0415	70.8266	64.365	30.1408	32.6993	31.7615
ENSG00000224812	TMEM72-AS1	antisense	0.0267455	-0.586686	0.665871	49.1974	44.0982	76.5693	67.0102	35.9745	35.4242	39.7019
ENSG00000280870	MIR325HG	lincRNA	1.79036e-21	-4.19154	0.0547294	49.1653	78.0906	101.454	88.1713	4.86141	5.44988	3.52906
ENSG00000168843	FSTL5	protein_coding	0.00732394	-0.725253	0.604891	49.0652	38.586	59.3412	50.2576	22.3625	24.5244	33.526
ENSG00000185697	MYBL1	protein_coding	0.00616799	-0.664253	0.631015	48.621	57.8789	66.041	63.4833	35.9745	40.8741	31.7615
ENSG00000151322	NPAS3	protein_coding	9.64394e-21	-2.7166	0.152132	48.5015	85.4403	91.8832	111.978	12.6397	14.533	14.9985
ENSG00000154188	ANGPT1	protein_coding	0.00632675	-0.705856	0.613079	46.7443	67.0661	57.427	67.0102	38.8913	33.6076	34.4083
ENSG00000253106	RP11-158K1.3	antisense	0.00796504	-0.708791	0.611833	46.3622	52.3667	48.8129	68.7736	35.9745	34.5159	23.8211
ENSG00000248605	CTD-2306M5.1	lincRNA	2.40064e-16	-3.31095	0.100764	46.0026	72.5784	81.3549	88.1713	3.88913	9.99144	8.82264
ENSG00000125046	SSUH2	protein_coding	0.00111117	-0.924971	0.526691	44.6251	47.7731	71.7837	55.5479	26.2516	34.5159	22.9389
ENSG00000111961	SASH1	protein_coding	7.12364e-08	-1.46313	0.362706	44.4696	67.9848	66.041	73.1822	21.3902	29.9743	19.4098
ENSG00000173928	SWSAP1	protein_coding	0.020664	-0.595383	0.661869	44.4235	49.6105	47.8558	58.1931	30.1408	30.8826	31.7615
ENSG00000243479	MNX1-AS1	lincRNA	0.0157476	-0.633108	0.644786	44.4187	58.7977	52.6414	51.1393	40.8359	28.1577	25.5857
ENSG00000018408	WWTR1	protein_coding	6.18564e-06	-1.38908	0.381809	44.2307	45.017	78.4836	59.0748	17.5011	24.5244	22.0566
ENSG00000135318	NT5E	protein_coding	4.09001e-21	-3.95567	0.0644502	43.9848	85.4403	76.5693	94.3433	4.86141	2.72494	7.94038
ENSG00000197056	ZMYM1	protein_coding	0.0251277	-0.598703	0.660347	43.6614	56.0415	43.0702	66.1285	28.1962	38.1491	30.8792
ENSG00000136235	GPNMB	protein_coding	0.0059402	-0.827453	0.563523	43.3711	56.0415	39.2418	67.0102	36.9467	19.9829	24.7034
ENSG00000239256	RPL35AP35	processed_pseudogene	0.0179863	-0.592614	0.66314	43.0784	47.7731	55.5128	52.9028	29.1685	32.6993	31.7615
ENSG00000176204	LRRTM4	protein_coding	1.34065e-06	-1.73704	0.299984	43.0065	37.6673	48.8129	53.7845	9.72283	9.99144	18.5275
ENSG00000283930	RP11-508N22.2	protein_coding	9.1978e-08	-1.51921	0.348877	42.9061	61.5538	67.9553	69.6553	20.4179	19.9829	24.7034
ENSG00000237686	RP5-1120P11.1	antisense	8.9211e-09	-1.69207	0.309482	42.8309	76.2532	84.2263	60.8382	17.5011	26.3411	20.2921
ENSG00000183696	UPP1	protein_coding	0.000192556	-1.07199	0.475661	41.341	48.6918	64.1268	56.4296	28.1962	28.1577	17.6453
ENSG00000161929	SCIMP	protein_coding	2.75991e-05	-1.35492	0.390958	41.2757	80.8468	51.6843	56.4296	32.0853	15.4413	20.2921
ENSG00000102174	PHEX	protein_coding	0.000388957	-1.09503	0.468125	40.7961	46.8544	62.2126	60.8382	31.1131	19.9829	21.1743
ENSG00000228222	AC074363.1	lincRNA	0.0181432	-0.671778	0.627733	40.7937	42.2608	61.2555	44.0856	20.4179	30.8826	29.997
ENSG00000234753	FOXP4-AS1	antisense	0.0148001	-0.737142	0.599927	40.7373	50.5292	53.5985	51.1393	36.9467	19.9829	24.7034
ENSG00000157782	CABP1	protein_coding	0.00296753	-0.879916	0.543399	40.0735	37.6673	59.3412	67.0102	24.3071	29.9743	25.5857
ENSG00000168685	IL7R	protein_coding	2.52433e-14	-2.3692	0.193553	39.9676	70.7409	64.1268	70.537	13.612	11.8081	12.3517
ENSG00000157388	CACNA1D	protein_coding	0.000468929	-1.02033	0.493004	39.9002	45.9357	75.6122	59.0748	28.1962	27.2494	25.5857
ENSG00000135919	SERPINE2	protein_coding	3.83294e-05	-1.30221	0.405504	39.4467	43.1795	38.2847	44.9674	18.4734	13.6247	14.9985
ENSG00000066056	TIE1	protein_coding	5.8815e-19	-4.05546	0.0601432	39.416	84.5216	66.9982	76.709	4.86141	1.81663	6.17585
ENSG00000260725	AC005307.1	lincRNA	0.00020384	-1.08625	0.470985	39.2214	57.8789	74.6551	59.0748	19.4457	33.6076	29.1147
ENSG00000105514	RAB3D	protein_coding	0.0178778	-0.638053	0.64258	39.072	45.017	54.5556	46.7308	30.1408	22.7078	30.8792
ENSG00000154175	ABI3BP	protein_coding	1.10179e-10	-1.94739	0.259286	38.9912	65.2287	66.041	71.4187	16.5288	14.533	18.5275
ENSG00000163661	PTX3	protein_coding	0.00805778	-0.780601	0.582124	38.9688	43.1795	44.0274	60.8382	30.1408	29.066	17.6453
ENSG00000196878	LAMB3	protein_coding	6.46154e-07	-1.39397	0.380515	38.8559	58.7977	59.3412	65.2468	24.3071	18.1663	22.9389
ENSG00000247982	LINC00926	lincRNA	0.0150184	-0.670461	0.628306	38.6758	45.9357	49.7701	58.1931	24.3071	26.3411	35.2906
ENSG00000237452	BHMG1	protein_coding	0.0226593	-0.621817	0.649852	38.5695	56.0415	44.0274	38.7954	25.2794	27.2494	27.3502
ENSG00000231689	LINC01090	lincRNA	4.68282e-08	-1.84056	0.279214	38.4005	53.2854	48.8129	57.3113	10.6951	18.1663	12.3517
ENSG00000164949	GEM	protein_coding	1.10305e-06	-1.48323	0.357688	38.1215	54.2041	49.7701	64.365	17.5011	12.7164	25.5857
ENSG00000258602	LINC01629	lincRNA	0.0108269	-0.740777	0.598417	38.0085	71.6596	47.8558	51.1393	38.8913	22.7078	29.1147
ENSG00000242317	RP11-875H7.5	lincRNA	8.66927e-12	-2.695	0.154427	38.0018	41.3421	61.2555	51.1393	6.80598	9.08313	6.17585
ENSG00000182732	RGS6	protein_coding	0.00721186	-0.79614	0.575888	37.9078	40.4234	54.5556	59.0748	19.4457	25.4328	33.526
ENSG00000253250	C8orf88	protein_coding	1.12952e-11	-2.24254	0.211313	37.5706	53.2854	65.0839	76.709	17.5011	10.8998	10.5872
ENSG00000133640	LRRIQ1	protein_coding	1.7066e-11	-2.6742	0.15667	37.3446	52.3667	66.041	83.7627	7.77826	15.4413	6.17585
ENSG00000256008	RP11-728G15.1	antisense	0.00522661	-0.850231	0.554696	37.1757	42.2608	44.9845	55.5479	33.0576	21.7995	15.8808
ENSG00000124491	F13A1	protein_coding	6.32557e-16	-3.17686	0.110578	36.8854	57.8789	66.041	61.7199	4.86141	8.17481	6.17585
ENSG00000215267	AKR1C7P	transcribed_unprocessed_pseudogene	2.17524e-05	-1.20941	0.432445	36.8453	54.2041	47.8558	65.2468	20.4179	25.4328	21.1743
ENSG00000163637	PRICKLE2	protein_coding	2.68576e-09	-2.02411	0.245857	35.6971	43.1795	47.8558	49.3759	9.72283	11.8081	10.5872
ENSG00000187134	AKR1C1	protein_coding	2.28997e-06	-1.71494	0.304616	35.336	38.586	38.2847	42.3222	11.6674	8.17481	13.234
ENSG00000132003	ZSWIM4	protein_coding	0.0214975	-0.666009	0.630248	35.0631	43.1795	38.2847	50.2576	27.2239	25.4328	20.2921
ENSG00000182584	ACTL10	protein_coding	0.0236941	-0.723324	0.6057	34.9953	47.7731	30.6277	52.9028	20.4179	16.3496	30.8792
ENSG00000090013	BLVRB	protein_coding	0.000278047	-1.13779	0.454457	34.902	41.3421	34.4562	37.9137	15.5565	15.4413	15.8808
ENSG00000259803	SLC22A31	protein_coding	0.00617279	-0.89258	0.53865	34.6517	36.7485	31.5848	40.5588	14.5842	15.4413	21.1743
ENSG00000130158	DOCK6	protein_coding	4.48339e-08	-1.96193	0.256685	34.3889	36.7485	50.7272	59.9565	12.6397	12.7164	9.70491
ENSG00000127329	PTPRB	protein_coding	2.81247e-05	-1.34263	0.394301	34.3072	55.1228	47.8558	62.6016	18.4734	22.7078	18.5275
ENSG00000144460	NYAP2	protein_coding	0.00189403	-0.975903	0.508422	34.2108	40.4234	44.0274	37.0319	17.5011	12.7164	24.7034
ENSG00000186094	AGBL4	protein_coding	0.0308257	-0.658955	0.633337	33.9938	33.0737	31.5848	35.2685	16.5288	22.7078	14.9985
ENSG00000230131	RP11-282I1.1	lincRNA	0.00631612	-0.909995	0.532187	33.9538	43.1795	47.8558	44.0856	19.4457	23.6161	19.4098
ENSG00000224218	RP11-359D14.3	antisense	0.000138474	-1.61201	0.327143	33.8914	35.8298	59.3412	29.9782	6.80598	19.0746	9.70491
ENSG00000125735	TNFSF14	protein_coding	5.63491e-07	-1.64355	0.320068	33.7751	56.9602	64.1268	53.7845	23.3348	12.7164	15.8808
ENSG00000267059	AC005943.2	protein_coding	0.0354753	-0.608035	0.65609	33.5373	45.017	32.542	46.7308	22.3625	22.7078	25.5857
ENSG00000267731	RP11-147L13.8	lincRNA	0.00678864	-0.804877	0.572411	32.6143	43.1795	51.6843	51.1393	16.5288	28.1577	29.1147
ENSG00000224322	AC004009.3	lincRNA	3.09588e-07	-1.95539	0.257851	32.2805	44.0982	65.0839	43.2039	9.72283	12.7164	13.234
ENSG00000226372	DCAF8L1	protein_coding	4.26118e-12	-3.35129	0.0979851	32.2477	48.6918	44.9845	39.6771	3.88913	4.54156	3.52906
ENSG00000224810	RP11-538D16.2	lincRNA	1.90448e-10	-9.1567	0.0017521	32.2351	52.3667	70.8266	44.0856	0	0	0
ENSG00000257048	RP11-476M19.2	lincRNA	1.42104e-06	-1.55695	0.339869	32.0323	53.2854	61.2555	55.5479	17.5011	17.2579	18.5275
ENSG00000130830	MPP1	protein_coding	1.31034e-05	-1.3991	0.379165	31.9271	36.7485	57.427	53.7845	15.5565	16.3496	19.4098
ENSG00000147724	FAM135B	protein_coding	0.0474873	-0.602589	0.658571	31.8915	38.586	29.6706	42.3222	13.612	24.5244	22.9389
ENSG00000132554	RGS22	protein_coding	0.000825688	-1.10697	0.464267	31.4522	41.3421	43.0702	46.7308	20.4179	21.7995	12.3517
ENSG00000206557	TRIM71	protein_coding	5.58717e-05	-1.28243	0.411101	31.433	50.5292	44.0274	52.9028	22.3625	20.8912	12.3517
ENSG00000105928	DFNA5	protein_coding	4.01433e-12	-2.98435	0.126363	31.0304	56.0415	43.0702	74.9456	11.6674	5.44988	3.52906
ENSG00000196923	PDLIM7	protein_coding	0.022339	-0.803736	0.572864	30.735	28.4801	55.5128	26.4514	13.612	21.7995	16.763
ENSG00000228412	RP4-625H18.2	antisense	0.0113642	-0.816484	0.567824	30.6859	42.2608	31.5848	37.9137	12.6397	26.3411	15.8808
ENSG00000173801	JUP	protein_coding	1.76651e-05	-1.40001	0.378926	30.5998	50.5292	56.4699	39.6771	21.3902	16.3496	13.234
ENSG00000247345	RP11-266N13.2	antisense	0.00442776	-0.905278	0.53393	30.0903	31.2363	39.2418	38.7954	16.5288	18.1663	16.763
ENSG00000124215	CDH26	protein_coding	2.13684e-05	-1.37653	0.385144	30.034	44.0982	56.4699	48.4942	17.5011	19.9829	14.9985
ENSG00000153714	LURAP1L	protein_coding	0.0110357	-0.901675	0.535265	30.0302	29.3988	46.8987	30.86	10.6951	19.9829	17.6453
ENSG00000187912	CLEC17A	protein_coding	5.74402e-05	-1.27726	0.41258	29.9992	49.6105	40.1989	56.4296	16.5288	21.7995	16.763
ENSG00000258667	HIF1A-AS2	lincRNA	0.000554784	-1.17104	0.444101	29.8099	45.9357	44.0274	55.5479	14.5842	18.1663	24.7034
ENSG00000169862	CTNND2	protein_coding	5.39323e-07	-1.6848	0.311046	29.7507	39.5047	52.6414	58.1931	11.6674	17.2579	14.1162
ENSG00000151789	ZNF385D	protein_coding	2.80719e-06	-2.03894	0.243342	29.621	27.5614	29.6706	31.7417	9.72283	4.54156	5.29358
ENSG00000257747	RP11-362A1.1	lincRNA	0.0193162	-0.78138	0.58181	29.3485	24.8053	30.6277	37.9137	18.4734	16.3496	11.4694
ENSG00000259048	CTD-2058B24.2	antisense	3.74126e-06	-1.75557	0.296156	29.3467	39.5047	66.9982	47.6125	9.72283	19.0746	12.3517
ENSG00000251002	AE000661.37	processed_transcript	0.0189233	-0.717199	0.608277	29.1341	46.8544	35.4133	55.5479	27.2239	25.4328	20.2921
ENSG00000150556	LYPD6B	protein_coding	1.79911e-11	-2.8906	0.134848	29.0703	57.8789	57.427	53.7845	2.91685	6.35819	11.4694
ENSG00000258958	RP11-594C13.2	lincRNA	0.00422033	-0.964868	0.512325	28.8615	33.0737	34.4562	44.9674	12.6397	19.0746	18.5275
ENSG00000162692	VCAM1	protein_coding	0.000247686	-1.31598	0.401652	28.8275	42.2608	30.6277	35.2685	16.5288	12.7164	9.70491
ENSG00000218357	LINC01644	lincRNA	1.65383e-08	-6.2122	0.0134878	28.1691	49.6105	57.427	62.6016	1.94457	0	0
ENSG00000283554	RP11-413N19.2	lincRNA	0.0419628	-0.627799	0.647163	28.114	40.4234	33.4991	25.5697	15.5565	19.0746	19.4098
ENSG00000154358	OBSCN	protein_coding	3.35234e-13	-3.37346	0.0964913	28.0931	59.7164	49.7701	55.5479	3.88913	8.17481	2.64679
ENSG00000260448	LCMT1-AS1	lincRNA	0.00422951	-0.914951	0.530362	28.093	37.6673	42.1131	42.3222	21.3902	19.0746	16.763
ENSG00000169598	DFFB	protein_coding	0.00776246	-0.890966	0.539253	27.9889	37.6673	28.7135	41.4405	14.5842	14.533	21.1743
ENSG00000103569	AQP9	protein_coding	0.00395451	-0.969022	0.510852	27.9051	32.155	46.8987	44.9674	25.2794	14.533	15.8808
ENSG00000225489	RP11-390F4.3	lincRNA	0.000755956	-1.28032	0.411703	27.7923	41.3421	32.542	48.4942	13.612	17.2579	13.234
ENSG00000114737	CISH	protein_coding	0.00202453	-1.09724	0.46741	27.7151	34.9111	41.156	34.3868	15.5565	16.3496	13.234
ENSG00000172987	HPSE2	protein_coding	9.90582e-10	-2.31868	0.200451	27.6985	50.5292	69.8695	52.9028	8.75055	10.8998	12.3517
ENSG00000066923	STAG3	protein_coding	4.76211e-05	-1.63427	0.322133	27.125	51.448	26.7993	62.6016	10.6951	17.2579	12.3517
ENSG00000177627	C12orf54	protein_coding	3.10562e-06	-1.77046	0.293114	27.0151	40.4234	38.2847	45.8491	9.72283	17.2579	6.17585
ENSG00000261371	PECAM1	protein_coding	0.0140281	-0.834068	0.560945	26.7113	41.3421	34.4562	24.688	17.5011	16.3496	14.1162
ENSG00000197134	ZNF257	protein_coding	3.43366e-09	-2.45166	0.182801	26.6489	36.7485	49.7701	39.6771	5.8337	8.17481	7.05811
ENSG00000171992	SYNPO	protein_coding	0.000173887	-1.36295	0.388786	26.0735	40.4234	35.4133	43.2039	11.6674	16.3496	13.234
ENSG00000185222	TCEAL9	protein_coding	5.76968e-05	-1.52314	0.347929	25.4782	31.2363	36.3704	36.1502	14.5842	8.17481	9.70491
ENSG00000137261	KIAA0319	protein_coding	0.0285517	-0.707927	0.612199	24.7352	30.3175	30.6277	35.2685	17.5011	19.0746	13.234
ENSG00000185133	INPP5J	protein_coding	0.0018996	-1.28467	0.410465	24.46	46.8544	21.0566	35.2685	18.4734	9.08313	8.82264
ENSG00000104833	TUBB4A	protein_coding	0.000842329	-1.5164	0.349558	24.3982	41.3421	40.1989	21.1611	8.75055	13.6247	7.94038
ENSG00000165178	NCF1C	unprocessed_pseudogene	0.0361063	-0.662829	0.631639	23.7944	28.4801	43.0702	29.0965	18.4734	14.533	20.2921
ENSG00000166289	PLEKHF1	protein_coding	0.0133924	-0.896436	0.537212	23.7694	27.5614	25.8421	28.2148	12.6397	14.533	9.70491
ENSG00000242268	LINC02082	lincRNA	6.97554e-06	-2.36917	0.193557	23.6718	31.2363	53.5985	35.2685	1.94457	9.99144	7.94038
ENSG00000088543	C3orf18	protein_coding	0.0341635	-0.719743	0.607206	23.4771	36.7485	22.9708	31.7417	13.612	12.7164	19.4098
ENSG00000029534	ANK1	protein_coding	0.000824271	-1.42769	0.371725	23.2872	24.8053	29.6706	35.2685	12.6397	9.99144	6.17585
ENSG00000138735	PDE5A	protein_coding	6.6134e-07	-2.59451	0.165568	23.2341	33.9924	25.8421	40.5588	2.91685	2.72494	8.82264
ENSG00000126970	ZC4H2	protein_coding	1.44533e-11	-3.50118	0.0883161	22.6987	41.3421	44.0274	52.0211	3.88913	1.81663	5.29358
ENSG00000249948	GBA3	polymorphic_pseudogene	9.48935e-09	-2.49045	0.177951	22.4455	36.7485	36.3704	45.8491	5.8337	5.44988	7.94038
ENSG00000115594	IL1R1	protein_coding	5.11701e-05	-1.56715	0.337475	22.2012	29.3988	29.6706	35.2685	7.77826	10.8998	9.70491
ENSG00000179111	HES7	protein_coding	0.000162423	-1.76844	0.293526	22.1415	27.5614	37.3275	37.0319	8.75055	5.44988	11.4694
ENSG00000247498	RP11-392P7.6	antisense	4.35183e-10	-4.11692	0.0576346	22.1014	38.586	45.9416	42.3222	0	4.54156	1.76453
ENSG00000235711	ANKRD34C	protein_coding	0.000141628	-1.45563	0.364595	22.0517	29.3988	38.2847	31.7417	11.6674	9.08313	11.4694
ENSG00000152377	SPOCK1	protein_coding	0.0177431	-0.875848	0.544933	22.0382	21.1304	38.2847	26.4514	12.6397	11.8081	14.1162
ENSG00000197934	CYYR1-AS1	antisense	2.54776e-10	-4.69864	0.0385094	21.943	36.7485	51.6843	49.3759	0.972283	2.72494	0.882264
ENSG00000107738	VSIR	protein_coding	8.29848e-05	-1.59027	0.332109	21.9011	33.0737	30.6277	27.3331	10.6951	10.8998	5.29358
ENSG00000226025	LGALS17A	transcribed_unprocessed_pseudogene	5.84773e-05	-1.75612	0.296042	21.6292	33.0737	33.4991	29.0965	8.75055	6.35819	9.70491
ENSG00000189229	AC069277.2	lincRNA	0.00272514	-1.0641	0.47827	21.5527	33.0737	37.3275	33.5051	16.5288	11.8081	14.9985
ENSG00000173988	LRRC63	protein_coding	0.0235565	-0.864635	0.549186	21.1705	25.724	36.3704	30.86	5.8337	19.0746	15.8808
ENSG00000181856	SLC2A4	protein_coding	0.0121325	-0.95485	0.515895	21.1533	28.4801	22.0137	26.4514	8.75055	12.7164	11.4694
ENSG00000112232	KHDRBS2	protein_coding	0.00198829	-1.21307	0.431349	21.0699	31.2363	28.7135	29.0965	7.77826	14.533	10.5872
ENSG00000250742	RP11-834C11.4	lincRNA	2.9649e-06	-2.25424	0.209608	21.06	26.6427	25.8421	31.7417	3.88913	4.54156	7.05811
ENSG00000112394	SLC16A10	protein_coding	8.79808e-07	-2.25502	0.209494	20.952	32.155	45.9416	35.2685	7.77826	5.44988	7.94038
ENSG00000175730	BAK1P1	processed_pseudogene	0.038165	-0.723547	0.605607	20.3747	26.6427	28.7135	25.5697	15.5565	11.8081	12.3517
ENSG00000196220	SRGAP3	protein_coding	0.0337982	-0.760942	0.590111	20.2816	32.155	30.6277	24.688	18.4734	16.3496	7.05811
ENSG00000184735	DDX53	protein_coding	0.00425303	-1.2352	0.424784	20.1512	25.724	26.7993	30.86	12.6397	6.35819	10.5872
ENSG00000176244	ACBD7	protein_coding	0.000893231	-1.52534	0.347398	20.0295	31.2363	19.1423	28.2148	10.6951	9.99144	2.64679
ENSG00000236081	ELFN1-AS1	lincRNA	0.0485095	-0.695534	0.617481	19.9974	22.0491	30.6277	29.0965	16.5288	11.8081	11.4694
ENSG00000152463	OLAH	protein_coding	5.77644e-08	-2.44964	0.183056	19.667	33.9924	39.2418	43.2039	2.91685	9.99144	6.17585
ENSG00000110076	NRXN2	protein_coding	0.031701	-0.786326	0.579819	19.4521	28.4801	26.7993	29.9782	17.5011	11.8081	10.5872
ENSG00000238169	LINC01053	antisense	6.78069e-06	-2.05759	0.240216	19.3746	37.6673	27.7564	37.9137	2.91685	9.99144	8.82264
ENSG00000138829	FBN2	protein_coding	1.97386e-06	-2.48137	0.179075	19.3146	27.5614	20.0994	34.3868	5.8337	3.63325	3.52906
ENSG00000257759	RP11-486O13.4	lincRNA	0.0123374	-1.26515	0.416056	19.1916	19.293	32.542	26.4514	6.80598	9.08313	8.82264
ENSG00000184557	SOCS3	protein_coding	0.0269635	-0.816555	0.567796	19.1886	23.8865	20.0994	23.8062	10.6951	9.08313	11.4694
ENSG00000163898	LIPH	protein_coding	0.00469397	-1.11858	0.460547	19.1546	23.8865	23.9279	32.6234	13.612	10.8998	7.05811
ENSG00000197183	NOL4L	protein_coding	0.0272525	-0.84016	0.558582	19.1459	18.3743	22.9708	26.4514	9.72283	12.7164	7.94038
ENSG00000076826	CAMSAP3	protein_coding	0.0464274	-0.740389	0.598578	19.1006	33.9924	25.8421	26.4514	13.612	14.533	11.4694
ENSG00000127324	TSPAN8	protein_coding	5.66625e-06	-2.40734	0.188503	19.0712	25.724	26.7993	31.7417	3.88913	6.35819	3.52906
ENSG00000187398	LUZP2	protein_coding	6.10275e-05	-1.89268	0.269306	18.4164	28.4801	20.0994	33.5051	3.88913	4.54156	10.5872
ENSG00000185737	NRG3	protein_coding	0.00104676	-1.52218	0.348161	18.404	20.2117	21.0566	39.6771	4.86141	7.2665	11.4694
ENSG00000173253	DMRT2	protein_coding	5.71862e-08	-4.11015	0.0579059	18.146	29.3988	36.3704	27.3331	1.94457	1.81663	0.882264
ENSG00000267284	RP11-397A16.1	lincRNA	3.14013e-07	-3.17958	0.11037	17.51	26.6427	40.1989	20.2794	2.91685	0.908313	4.41132
ENSG00000258601	RP11-81F13.2	antisense	4.76211e-05	-2.82928	0.140702	17.4571	17.4556	19.1423	19.3977	0.972283	3.63325	1.76453
ENSG00000150361	KLHL1	protein_coding	3.4536e-05	-2.14029	0.226834	17.3963	21.1304	22.0137	22.9245	4.86141	5.44988	2.64679
ENSG00000165966	PDZRN4	protein_coding	0.00165188	-1.55844	0.339517	17.3794	14.6994	26.7993	27.3331	5.8337	3.63325	9.70491
ENSG00000204740	MALRD1	protein_coding	0.0394753	-0.727207	0.604072	17.1633	22.9678	28.7135	29.9782	10.6951	17.2579	11.4694
ENSG00000188517	COL25A1	protein_coding	0.0498804	-0.728533	0.603517	17.026	22.9678	22.0137	26.4514	4.86141	15.4413	12.3517
ENSG00000128284	APOL3	protein_coding	0.000576205	-1.55203	0.34103	16.9181	23.8865	32.542	22.9245	9.72283	8.17481	5.29358
ENSG00000254343	RP11-760H22.2	lincRNA	2.49372e-06	-2.47613	0.179726	16.8014	29.3988	23.9279	22.9245	4.86141	4.54156	2.64679
ENSG00000226733	RP11-397G17.1	protein_coding	9.40686e-06	-2.40269	0.189111	16.7937	16.5368	30.6277	37.0319	1.94457	5.44988	6.17585
ENSG00000137501	SYTL2	protein_coding	0.00458685	-1.28082	0.41156	16.7692	28.4801	23.9279	26.4514	9.72283	3.63325	13.234
ENSG00000198816	ZNF358	protein_coding	0.0365662	-0.741861	0.597968	16.7607	27.5614	23.9279	22.9245	11.6674	11.8081	12.3517
ENSG00000140009	ESR2	protein_coding	0.049128	-0.715015	0.609199	16.5465	19.293	24.885	25.5697	6.80598	9.99144	15.8808
ENSG00000122224	LY9	protein_coding	0.00152521	-1.40224	0.378342	16.3431	28.4801	27.7564	18.516	5.8337	8.17481	9.70491
ENSG00000259639	RP11-184D12.1	lincRNA	1.69277e-05	-2.10435	0.232556	16.1317	24.8053	30.6277	30.86	5.8337	6.35819	5.29358
ENSG00000178338	ZNF354B	protein_coding	1.63864e-05	-2.17216	0.221878	16.0615	28.4801	20.0994	32.6234	6.80598	3.63325	5.29358
ENSG00000234807	LINC01135	lincRNA	0.0238328	-0.945815	0.519136	16.013	23.8865	30.6277	14.1074	10.6951	9.08313	7.94038
ENSG00000203601	LINC00970	antisense	0.043774	-0.800489	0.574155	15.9968	18.3743	25.8421	17.6343	5.8337	9.99144	10.5872
ENSG00000179934	CCR8	protein_coding	5.26998e-07	-4.90435	0.0333922	15.9849	39.5047	40.1989	23.8062	0	0	2.64679
ENSG00000073008	PVR	protein_coding	2.54402e-08	-8.17048	0.0034709	15.9553	25.724	32.542	37.0319	0	0	0
ENSG00000188089	PLA2G4E	protein_coding	0.0133705	-1.07711	0.473978	15.9402	15.6181	27.7564	34.3868	9.72283	7.2665	12.3517
ENSG00000092051	JPH4	protein_coding	0.000470035	-1.5875	0.332747	15.778	22.9678	23.9279	30.86	10.6951	4.54156	7.05811
ENSG00000167748	KLK1	protein_coding	0.0224965	-0.925436	0.526521	15.5969	30.3175	19.1423	22.9245	6.80598	10.8998	12.3517
ENSG00000275418	RP11-126O1.6	lincRNA	0.00102258	-1.64052	0.320742	15.253	25.724	17.2281	22.9245	10.6951	2.72494	4.41132
ENSG00000177103	DSCAML1	protein_coding	0.00692654	-1.26778	0.415298	15.2014	14.6994	21.0566	24.688	5.8337	7.2665	7.05811
ENSG00000109686	SH3D19	protein_coding	0.000842058	-1.58648	0.332983	15.1142	27.5614	30.6277	20.2794	1.94457	9.99144	9.70491
ENSG00000253789	NARSP2	transcribed_processed_pseudogene	0.000112169	-2.36317	0.194363	14.9155	15.6181	25.8421	15.8708	1.94457	3.63325	3.52906
ENSG00000237153	RP11-132E11.2	lincRNA	0.001121	-1.52337	0.347872	14.7917	20.2117	29.6706	29.0965	10.6951	3.63325	8.82264
ENSG00000154415	PPP1R3A	protein_coding	0.000642815	-1.76489	0.294249	14.7042	20.2117	21.0566	29.9782	4.86141	5.44988	7.05811
ENSG00000197632	SERPINB2	protein_coding	0.0200094	-1.03155	0.489185	14.4404	22.9678	15.3139	24.688	7.77826	8.17481	7.94038
ENSG00000148180	GSN	protein_coding	0.0358957	-0.870642	0.546903	14.4202	12.862	27.7564	26.4514	8.75055	7.2665	11.4694
ENSG00000164175	SLC45A2	protein_coding	0.0467287	-0.801946	0.573575	14.3858	19.293	18.1852	14.9891	9.72283	4.54156	7.94038
ENSG00000218819	TDRD15	protein_coding	0.0410466	-0.755716	0.592252	14.2557	21.1304	22.9708	21.1611	8.75055	11.8081	9.70491
ENSG00000215512	AP005901.1	transcribed_unprocessed_pseudogene	0.0122301	-1.17873	0.441739	14.2528	18.3743	17.2281	14.9891	8.75055	3.63325	5.29358
ENSG00000119280	C1orf198	protein_coding	0.00284568	-1.52587	0.34727	14.1843	23.8865	23.9279	11.4623	5.8337	7.2665	3.52906
ENSG00000176024	ZNF613	protein_coding	6.97554e-06	-2.96193	0.128342	14.1422	29.3988	22.9708	24.688	2.91685	1.81663	3.52906
ENSG00000174175	SELP	protein_coding	0.00023663	-1.98436	0.252726	13.6095	21.1304	35.4133	30.86	6.80598	6.35819	5.29358
ENSG00000254614	AP003068.23	antisense	0.00543988	-1.40334	0.378052	13.5892	16.5368	16.271	22.0428	3.88913	8.17481	4.41132
ENSG00000282195	SORD2P	transcribed_unprocessed_pseudogene	0.0464918	-0.902562	0.534936	13.5243	14.6994	20.0994	22.0428	9.72283	2.72494	7.94038
ENSG00000260073	RP11-488I20.9	lincRNA	0.0286363	-0.997811	0.500759	13.3572	17.4556	16.271	22.9245	5.8337	3.63325	11.4694
ENSG00000248475	RP11-479O16.1	antisense	9.49674e-05	-2.31453	0.201029	13.2205	13.7807	22.0137	29.9782	2.91685	2.72494	5.29358
ENSG00000227591	RP1-28O10.1	antisense	0.0107542	-1.20663	0.43328	13.1281	16.5368	19.1423	23.8062	8.75055	5.44988	6.17585
ENSG00000183813	CCR4	protein_coding	7.8447e-07	-3.41724	0.0936072	13.1024	34.9111	31.5848	26.4514	0.972283	2.72494	3.52906
ENSG00000232451	AC016768.1	lincRNA	7.28839e-08	-3.61723	0.08149	13.0832	29.3988	30.6277	31.7417	1.94457	2.72494	1.76453
ENSG00000227018	IL6STP1	processed_pseudogene	8.76588e-05	-2.3835	0.191644	12.9174	21.1304	18.1852	18.516	1.94457	4.54156	2.64679
ENSG00000135298	ADGRB3	protein_coding	0.000223507	-2.11056	0.231557	12.917	26.6427	22.0137	14.1074	5.8337	4.54156	1.76453
ENSG00000231662	RP11-686D16.1	lincRNA	0.00128741	-1.92069	0.264129	12.7782	16.5368	24.885	23.8062	0.972283	5.44988	7.05811
ENSG00000153993	SEMA3D	protein_coding	4.18057e-06	-2.76861	0.146745	12.6873	29.3988	22.0137	29.0965	2.91685	1.81663	5.29358
ENSG00000266088	RP5-1028K7.2	lincRNA	0.00800817	-1.23923	0.423598	12.6404	17.4556	22.9708	19.3977	6.80598	9.08313	4.41132
ENSG00000228168	HNRNPA1P21	processed_pseudogene	2.90249e-06	-4.50027	0.0441858	12.6299	35.8298	25.8421	18.516	2.91685	0	0
ENSG00000134323	MYCN	protein_coding	2.72582e-06	-4.48502	0.0446556	12.5827	22.9678	23.9279	30.86	0	0.908313	1.76453
ENSG00000242110	AMACR	protein_coding	0.0406027	-0.828784	0.563004	12.5692	15.6181	19.1423	19.3977	5.8337	9.08313	7.94038
ENSG00000145147	SLIT2	protein_coding	0.00342001	-1.56558	0.337841	12.4033	14.6994	17.2281	19.3977	5.8337	4.54156	3.52906
ENSG00000163207	IVL	protein_coding	1.36131e-05	-2.72623	0.151121	12.2967	18.3743	24.885	22.0428	3.88913	1.81663	2.64679
ENSG00000250673	RP11-6L6.2	protein_coding	0.00321895	-1.78279	0.290621	12.2482	10.1058	28.7135	14.9891	5.8337	2.72494	3.52906
ENSG00000263482	ANTXRLP1	unprocessed_pseudogene	0.0122943	-1.31321	0.402423	12.1013	13.7807	22.0137	18.516	3.88913	5.44988	7.05811
ENSG00000230781	RP1-215K18.4	unitary_pseudogene	0.0102556	-1.30853	0.403732	11.8436	28.4801	20.0994	16.7525	6.80598	9.08313	4.41132
ENSG00000115252	PDE1A	protein_coding	0.0202335	-1.24466	0.422008	11.8373	7.34971	22.9708	21.1611	2.91685	9.08313	3.52906
ENSG00000136383	ALPK3	protein_coding	0.0414902	-0.943692	0.519901	11.8027	11.0246	16.271	15.8708	4.86141	4.54156	6.17585
ENSG00000186205	MARC1	protein_coding	0.0422569	-0.89138	0.539098	11.7977	17.4556	22.0137	15.8708	6.80598	4.54156	9.70491
ENSG00000182601	HS3ST4	protein_coding	0.0187571	-1.14703	0.451553	11.7226	16.5368	20.0994	14.9891	6.80598	6.35819	4.41132
ENSG00000234275	AC017053.1	lincRNA	0.0285517	-1.1353	0.455239	11.6938	10.1058	32.542	15.8708	4.86141	7.2665	6.17585
ENSG00000142224	IL19	protein_coding	1.00509e-05	-5.73786	0.0187383	11.6742	18.3743	34.4562	23.8062	0.972283	0	0
ENSG00000135299	ANKRD6	protein_coding	0.0168869	-1.15738	0.448327	11.6199	16.5368	22.9708	17.6343	8.75055	6.35819	4.41132
ENSG00000233103	RP11-524P6.1	lincRNA	3.16372e-07	-7.56121	0.00529481	11.5502	23.8865	22.9708	21.1611	0	0	0
ENSG00000104953	TLE6	protein_coding	0.046776	-0.843475	0.5573	11.547	16.5368	17.2281	12.344	3.88913	8.17481	6.17585
ENSG00000117480	FAAH	protein_coding	0.0458633	-0.860656	0.550702	11.5267	13.7807	13.3996	16.7525	3.88913	7.2665	6.17585
ENSG00000075618	FSCN1	protein_coding	0.0320806	-1.00385	0.498667	11.1603	16.5368	13.3996	15.8708	5.8337	6.35819	4.41132
ENSG00000261319	LINC02152	lincRNA	3.85312e-05	-3.55569	0.0850414	10.9546	21.1304	20.0994	14.1074	0.972283	1.81663	0.882264
ENSG00000189221	MAOA	protein_coding	0.0389642	-1.00263	0.499089	10.9525	13.7807	16.271	18.516	1.94457	9.99144	4.41132
ENSG00000214960	ISPD	protein_coding	0.00742614	-1.58722	0.332812	10.9042	11.9433	11.4854	20.2794	0.972283	5.44988	4.41132
ENSG00000160181	TFF2	protein_coding	0.0344154	-1.27436	0.41341	10.755	19.293	8.61405	11.4623	0	7.2665	2.64679
ENSG00000228080	HLA-DRB1	protein_coding	0.041405	-1.0504	0.482833	10.7233	13.7807	8.61405	18.516	2.91685	3.63325	6.17585
ENSG00000172594	SMPDL3A	protein_coding	0.0467785	-0.891637	0.539002	10.6829	11.0246	12.4425	18.516	5.8337	4.54156	5.29358
ENSG00000113231	PDE8B	protein_coding	0.0114254	-1.56865	0.337124	10.6674	13.7807	10.5283	13.2257	0.972283	5.44988	2.64679
ENSG00000178053	MLF1	protein_coding	0.00173919	-1.88815	0.270153	10.663	16.5368	17.2281	14.1074	6.80598	1.81663	1.76453
ENSG00000145569	FAM105A	protein_coding	0.0142811	-1.39508	0.380224	10.2951	11.9433	14.3567	20.2794	4.86141	3.63325	4.41132
ENSG00000256469	RP11-856F16.2	antisense	2.34359e-05	-2.9079	0.13324	10.2806	16.5368	28.7135	22.0428	1.94457	3.63325	1.76453
ENSG00000184374	COLEC10	protein_coding	0.000201575	-2.48695	0.178384	10.2315	27.5614	20.0994	16.7525	2.91685	4.54156	1.76453
ENSG00000137868	STRA6	protein_coding	0.0346158	-1.00721	0.497509	10.1719	12.862	15.3139	15.8708	2.91685	6.35819	6.17585
ENSG00000135248	FAM71F1	protein_coding	3.37325e-05	-2.81987	0.141624	10.1688	21.1304	23.9279	18.516	3.88913	0.908313	2.64679
ENSG00000166006	KCNC2	protein_coding	7.14948e-05	-2.9324	0.130996	10.1516	15.6181	20.0994	16.7525	0.972283	1.81663	2.64679
ENSG00000260289	CTD-2535I10.1	lincRNA	0.000214195	-3.26625	0.103934	10.1316	12.862	20.0994	14.1074	2.91685	0	0.882264
ENSG00000142149	HUNK	protein_coding	0.00742614	-1.46444	0.362377	10.1105	11.0246	25.8421	22.9245	5.8337	6.35819	4.41132
ENSG00000196335	STK31	protein_coding	0.000589971	-2.18294	0.220226	10.0644	20.2117	13.3996	18.516	1.94457	3.63325	3.52906
ENSG00000197261	C6orf141	protein_coding	0.0119731	-1.23554	0.424682	9.98388	15.6181	16.271	21.1611	5.8337	5.44988	6.17585
ENSG00000236938	AC003092.2	lincRNA	6.67836e-05	-5.26009	0.0260948	9.82294	21.1304	21.0566	15.8708	0	0.908313	0
ENSG00000254854	CTD-2523D13.2	antisense	0.00376526	-1.78562	0.290051	9.66719	14.6994	12.4425	14.1074	1.94457	4.54156	2.64679
ENSG00000157077	ZFYVE9	protein_coding	0.0441189	-0.955608	0.515624	9.48107	11.0246	13.3996	14.9891	3.88913	3.63325	6.17585
ENSG00000233308	OSTN-AS1	antisense	0.0347594	-0.984143	0.505526	9.4303	21.1304	15.3139	16.7525	4.86141	8.17481	6.17585
ENSG00000232006	AC005537.2	lincRNA	0.0123486	-1.52833	0.346678	9.39399	9.18713	18.1852	13.2257	1.94457	6.35819	1.76453
ENSG00000258479	LINC00640	lincRNA	0.0454663	-0.944684	0.519544	9.39038	15.6181	13.3996	15.8708	0.972283	8.17481	6.17585
ENSG00000265751	RP11-296E23.1	antisense	0.000526136	-2.36513	0.1941	9.21559	14.6994	22.0137	17.6343	1.94457	4.54156	1.76453
ENSG00000102870	ZNF629	protein_coding	0.0304178	-1.35044	0.392173	9.03989	10.1058	5.7427	13.2257	3.88913	3.63325	0
ENSG00000039560	RAI14	protein_coding	0.0016997	-2.25462	0.209551	8.99676	8.26842	19.1423	19.3977	3.88913	0.908313	2.64679
ENSG00000196872	KIAA1211L	protein_coding	0.0378701	-1.14174	0.453213	8.9927	9.18713	15.3139	14.1074	4.86141	3.63325	2.64679
ENSG00000255364	SMILR	lincRNA	0.000230027	-3.28497	0.102595	8.98988	14.6994	15.3139	17.6343	1.94457	0	1.76453
ENSG00000238755	LINC02006	processed_transcript	0.0447182	-0.966633	0.511699	8.80433	11.9433	12.4425	13.2257	3.88913	4.54156	4.41132
ENSG00000112195	TREML2	protein_coding	0.0229873	-1.41353	0.375392	8.79935	13.7807	6.69982	15.8708	0.972283	4.54156	3.52906
ENSG00000253103	LINC01609	lincRNA	0.0411229	-1.06696	0.477324	8.58798	8.26842	14.3567	16.7525	6.80598	0.908313	4.41132
ENSG00000249881	CTB-57H20.1	sense_overlapping	0.0450183	-0.961317	0.513588	8.33262	11.9433	17.2281	11.4623	4.86141	3.63325	5.29358
ENSG00000151632	AKR1C2	protein_coding	0.000278514	-4.84711	0.0347436	8.32833	14.6994	11.4854	19.3977	0	0.908313	0
ENSG00000227838	RP1-213J1P__B.1	lincRNA	0.000561298	-3.43884	0.0922156	8.19029	11.9433	19.1423	10.5806	0	0.908313	1.76453
ENSG00000229719	MIR194-2HG	lincRNA	0.0203495	-1.36963	0.386992	8.15941	9.18713	13.3996	18.516	4.86141	2.72494	3.52906
ENSG00000251516	RP11-10G12.2	unprocessed_pseudogene	0.0261114	-1.29732	0.406882	8.13376	13.7807	10.5283	8.81713	1.94457	2.72494	4.41132
ENSG00000196159	FAT4	protein_coding	0.0247734	-1.44402	0.367542	8.12466	7.34971	15.3139	7.93542	1.94457	3.63325	1.76453
ENSG00000141655	TNFRSF11A	protein_coding	0.039759	-1.37341	0.385978	7.88812	12.862	6.69982	5.29028	2.91685	0.908313	1.76453
ENSG00000249998	RP11-141E13.1	lincRNA	0.00557342	-2.19407	0.218534	7.84346	9.18713	18.1852	14.9891	0	3.63325	2.64679
ENSG00000268849	SIGLEC22P	transcribed_unprocessed_pseudogene	0.00164576	-2.58532	0.166625	7.77202	9.18713	10.5283	17.6343	0	1.81663	2.64679
ENSG00000114248	LRRC31	protein_coding	0.0432733	-1.06505	0.477956	7.72201	17.4556	12.4425	7.0537	2.91685	6.35819	1.76453
ENSG00000184500	PROS1	protein_coding	0.0123851	-1.67741	0.312644	7.51149	8.26842	15.3139	14.9891	4.86141	2.72494	0.882264
ENSG00000164120	HPGD	protein_coding	0.00989469	-1.67147	0.313934	7.42127	11.0246	10.5283	14.9891	1.94457	4.54156	1.76453
ENSG00000230006	ANKRD36BP2	transcribed_unprocessed_pseudogene	0.0435614	-1.17343	0.443366	7.38727	7.34971	9.57117	10.5806	2.91685	3.63325	0.882264
ENSG00000186367	KIAA1024L	protein_coding	0.00159797	-2.74245	0.149431	7.18185	9.18713	11.4854	22.0428	0.972283	0	3.52906
ENSG00000260058	RP11-279O17.3	lincRNA	0.000133423	-5.88433	0.0169293	6.9995	4.59357	14.3567	9.69884	0	0	0
ENSG00000225963	AC009950.2	antisense	0.00978985	-3.10778	0.116002	6.96782	5.51228	4.78558	16.7525	0	0.908313	0.882264
ENSG00000250433	CLSTN2-AS1	antisense	0.0144125	-1.54475	0.342754	6.95002	11.9433	10.5283	15.8708	3.88913	1.81663	3.52906
ENSG00000137507	LRRC32	protein_coding	0.00609287	-2.04072	0.243043	6.8082	12.862	15.3139	9.69884	2.91685	3.63325	0
ENSG00000234056	LINC00463	lincRNA	0.0120769	-1.7085	0.305978	6.8041	12.862	8.61405	13.2257	3.88913	1.81663	1.76453
ENSG00000230782	RP11-508N12.2	antisense	0.0388727	-1.15203	0.44999	6.62815	9.18713	9.57117	13.2257	2.91685	2.72494	3.52906
ENSG00000277656	GSTT1	protein_coding	0.00274963	-2.68297	0.15572	6.62275	10.1058	12.4425	11.4623	1.94457	1.81663	0
ENSG00000268100	ZNF725P	unprocessed_pseudogene	0.0327034	-1.28817	0.40947	6.57578	11.0246	16.271	8.81713	4.86141	1.81663	2.64679
ENSG00000255621	RP11-377D9.3	lincRNA	0.000411716	-4.69124	0.0387075	6.43559	10.1058	20.0994	11.4623	0	0.908313	0
ENSG00000169994	MYO7B	protein_coding	0.0141119	-1.89116	0.269591	6.30922	9.18713	12.4425	9.69884	0.972283	2.72494	1.76453
ENSG00000143061	IGSF3	protein_coding	0.0116688	-1.70358	0.307023	6.18372	10.1058	18.1852	10.5806	1.94457	4.54156	1.76453
ENSG00000012504	NR1H4	protein_coding	0.0260108	-1.71123	0.305399	6.06451	6.43099	7.65693	10.5806	0.972283	0.908313	2.64679
ENSG00000255325	RP11-96B2.1	lincRNA	0.011141	-2.10552	0.232367	5.90058	9.18713	8.61405	12.344	0.972283	0.908313	2.64679
ENSG00000115009	CCL20	protein_coding	0.0309685	-1.34088	0.39478	5.82539	12.862	12.4425	7.93542	1.94457	4.54156	1.76453
ENSG00000188373	C10orf99	protein_coding	0.0137286	-2.05561	0.240546	5.7586	15.6181	8.61405	6.17199	1.94457	1.81663	0.882264
ENSG00000282870	FRG1DP	unprocessed_pseudogene	0.0369362	-1.41085	0.37609	5.64458	8.26842	9.57117	12.344	1.94457	1.81663	2.64679
ENSG00000152214	RIT2	protein_coding	0.0226922	-1.5935	0.331366	5.63071	8.26842	16.271	10.5806	0.972283	1.81663	4.41132
ENSG00000204020	LIPN	protein_coding	0.00971437	-3.02808	0.12259	5.61817	8.26842	9.57117	7.0537	0	0	1.76453
ENSG00000254968	RP11-65M17.3	lincRNA	0.0482827	-1.50686	0.351875	5.5712	2.75614	10.5283	7.93542	0	1.81663	1.76453
ENSG00000256597	FLJ37505	lincRNA	0.0432095	-1.36103	0.389303	5.54963	6.43099	13.3996	7.0537	2.91685	1.81663	0.882264
ENSG00000079156	OSBPL6	protein_coding	0.0160099	-2.13859	0.227101	5.45158	9.18713	10.5283	7.0537	1.94457	1.81663	0
ENSG00000223351	ZNF385D-AS2	lincRNA	0.0168165	-1.73955	0.299462	5.42508	13.7807	15.3139	8.81713	0.972283	1.81663	4.41132
ENSG00000254163	CTC-340I23.2	antisense	0.018981	-2.04042	0.243093	5.2041	8.26842	6.69982	9.69884	0	0.908313	2.64679
ENSG00000089177	KIF16B	protein_coding	0.0118571	-2.21241	0.215773	5.20084	7.34971	9.57117	9.69884	0.972283	1.81663	0.882264
ENSG00000144366	GULP1	protein_coding	0.00914352	-2.39148	0.190587	5.12876	10.1058	7.65693	12.344	0.972283	0.908313	1.76453
ENSG00000263110	RP11-189E14.3	lincRNA	0.000137987	-5.91894	0.016528	5.12187	7.34971	8.61405	13.2257	0	0	0
ENSG00000283162	RP11-403F21.4	transcribed_unprocessed_pseudogene	0.0140583	-2.44081	0.184181	4.99897	9.18713	9.57117	6.17199	0	1.81663	0.882264
ENSG00000131951	LRRC9	protein_coding	0.0337646	-1.5654	0.337885	4.90799	8.26842	8.61405	12.344	1.94457	2.72494	0.882264
ENSG00000262655	SPON1	protein_coding	0.041456	-1.62165	0.324963	4.89464	5.51228	4.78558	11.4623	0.972283	2.72494	0
ENSG00000122420	PTGFR	protein_coding	0.0389707	-1.54636	0.342372	4.79774	8.26842	8.61405	7.93542	0	1.81663	2.64679
ENSG00000068781	STON1-GTF2A1L	protein_coding	0.0151932	-2.05015	0.241459	4.59737	10.1058	10.5283	10.5806	2.91685	1.81663	0
ENSG00000166669	ATF7IP2	protein_coding	0.0451628	-1.44653	0.366904	4.13865	6.43099	9.57117	8.81713	0	1.81663	2.64679
ENSG00000189420	ZFP92	protein_coding	0.0378701	-2.28701	0.204899	4.05805	5.51228	9.57117	4.40856	1.94457	0	0
ENSG00000262950	RP11-189E14.5	lincRNA	0.00294239	-4.01685	0.0617744	4.00272	10.1058	10.5283	8.81713	0	0	0.882264
ENSG00000156298	TSPAN7	protein_coding	0.00697175	-3.54815	0.085487	3.93986	7.34971	8.61405	7.0537	0.972283	0	0
ENSG00000185304	RGPD2	protein_coding	0.0176315	-2.48872	0.178164	3.90989	15.6181	4.78558	7.93542	0.972283	0.908313	0.882264
ENSG00000268744	CTD-3105H18.14	protein_coding	0.0331393	-2.37852	0.192306	3.88918	4.59357	6.69982	7.93542	0.972283	0.908313	0
ENSG00000228014	ZNF680P1	processed_pseudogene	0.0242775	-2.24271	0.211289	3.79403	8.26842	4.78558	11.4623	1.94457	0	0.882264
ENSG00000260846	FRG2HP	unprocessed_pseudogene	0.00168094	-4.90221	0.0334416	3.50594	6.43099	5.7427	6.17199	0	0	0

## Sheet: UP FC1.5 Cys vs control
ensID	gene_name	gene_type	padj	log2FC	FC	mean count	Cys.1	Cys.2	Cys.3	LCL.1	LCL.2	LCL.3
ENSG00000009694	TENM1	protein_coding	7.68163e-23	1.38945	2.61979	6518.56	7049.06	8983.12	8624.4	2776.35	3417.86	3053.37
ENSG00000115415	STAT1	protein_coding	8.8393e-96	1.0859	2.12269	5881.98	8087.47	7655.88	7857.25	3672.1	3677.24	3736.7
ENSG00000183580	FBXL7	protein_coding	2.17772e-13	1.27012	2.41182	5106.05	6026.94	8381.14	7811.48	2625.68	3526.97	2806.49
ENSG00000075420	FNDC3B	protein_coding	1.07266e-05	0.691973	1.61549	3902.14	4136.45	5549.53	5180.5	2690.91	3347.04	2859.39
ENSG00000198964	SGMS1	protein_coding	4.62268e-10	0.657545	1.5774	3283.43	3918.46	4405.39	4188.15	2384.06	2891.45	2524.34
ENSG00000157601	MX1	protein_coding	6.65279e-42	1.07577	2.10785	2516.52	3844.29	3548.49	3555.58	1735.45	1679.74	1745.79
ENSG00000111335	OAS2	protein_coding	4.94103e-77	1.13168	2.19113	2341	3472.52	3765.11	3675.51	1638.98	1637.63	1681.43
ENSG00000123066	MED13L	protein_coding	2.50135e-14	0.926969	1.90128	2250.14	2840.25	3657.4	3575.72	1646.33	1872.12	1686.72
ENSG00000277633	IGHG1	IG_C_gene	2.4364e-13	0.587272	1.5024	2124.71	2368.08	2652.09	2474.44	1792.41	1572.54	1569.45
ENSG00000129682	FGF13	protein_coding	1.46205e-24	1.34017	2.53181	1946.6	2691.9	3336.66	3404.54	1130.94	1361.98	1177.09
ENSG00000173068	BNC2	protein_coding	1.18384e-06	0.825106	1.77166	1834.25	1910.38	2685.6	2403.96	1141.96	1420.36	1248.51
ENSG00000137959	IFI44L	protein_coding	1.46205e-24	0.777032	1.7136	1599.21	2032.5	2002.23	1945.32	1069.38	1123.65	1264.38
ENSG00000260658	RP11-368L12.1	lincRNA	1.45527e-06	0.808955	1.75194	1545.91	1725.86	2288.27	2116.51	961.893	1243.29	1167.39
ENSG00000165995	CACNB2	protein_coding	1.11466e-11	0.886089	1.84816	1531.92	1844.35	2424.7	2306	1067.55	1272.01	1142.7
ENSG00000160294	MCM3AP	protein_coding	4.20591e-19	0.594472	1.50992	1466.56	1768.37	1878.96	1687.16	1162.17	1157.15	1185.02
ENSG00000259867	RP11-525K10.3	antisense	1.86565e-13	1.23869	2.35984	1456.56	1734	2489.33	2346.28	816.736	1065.27	828.81
ENSG00000259560	RP11-648K4.2	lincRNA	4.36906e-06	1.16572	2.24345	1426.46	1796.41	2696.37	2570.57	878.29	1211.71	865.842
ENSG00000258932	CTD-3006G17.2	transcribed_processed_pseudogene	1.50383e-06	0.795143	1.73525	1419.01	1745.76	2096.78	1845.53	898.502	1138.97	1128.59
ENSG00000187608	ISG15	protein_coding	6.13787e-11	0.881292	1.84202	1326.02	1929.38	1706.63	1680.75	1084.08	840.348	900.229
ENSG00000021645	NRXN3	protein_coding	3.92767e-44	2.37018	5.17005	1298.36	1748.47	2261.94	2253.82	342.68	457.502	391.481
ENSG00000057657	PRDM1	protein_coding	8.22054e-24	0.759675	1.69311	1278.11	1546.76	1579.77	1606.6	921.47	934.146	924.917
ENSG00000145362	ANK2	protein_coding	1.99994e-09	0.896333	1.86133	1275.9	1525.96	2005.82	1900.46	837.867	1010.72	990.164
ENSG00000133703	KRAS	protein_coding	1.13817e-15	0.817326	1.76214	1227.85	1440.93	1722.18	1519.64	801.118	946.588	871.132
ENSG00000196664	TLR7	protein_coding	6.30491e-46	1.19561	2.29042	1212.69	1451.78	1627.64	1615.76	644.018	700.609	689.499
ENSG00000147050	KDM6A	protein_coding	6.20853e-07	0.672324	1.59364	1209.76	1317.01	1584.55	1610.27	792.85	1039.43	924.917
ENSG00000123106	CCDC91	protein_coding	6.69156e-07	0.652073	1.57142	1193.91	1338.72	1604.9	1476.61	819.492	988.701	932.852
ENSG00000279877	RP11-420N3.3	processed_transcript	2.02539e-08	1.49588	2.82036	1145.76	1227.46	2065.66	2004.82	512.642	705.395	551.952
ENSG00000138640	FAM13A	protein_coding	1.09342e-07	0.672669	1.59402	1074.31	1166.85	1367.93	1281.62	710.165	801.107	826.165
ENSG00000169855	ROBO1	protein_coding	1.55972e-15	0.925561	1.89942	1065.83	1460.83	1754.5	1671.6	770.801	919.789	839.391
ENSG00000048052	HDAC9	protein_coding	6.23145e-06	0.602225	1.51806	1053.47	1183.14	1473.25	1355.77	724.865	926.489	917.863
ENSG00000175215	CTDSP2	protein_coding	2.33606e-13	0.597292	1.51287	994.741	1082.73	1164.48	1216.62	802.956	775.264	688.618
ENSG00000137965	IFI44	protein_coding	7.2232e-27	0.831117	1.77906	979.903	1304.34	1248.25	1292.61	679.848	691.038	772.381
ENSG00000185565	LSAMP	protein_coding	1.78596e-27	1.65526	3.14979	923.944	1444.55	1771.25	1664.28	447.413	582.884	491.996
ENSG00000150275	PCDH15	protein_coding	1.15316e-06	0.702922	1.6278	914.934	1055.6	1250.65	1225.78	626.563	741.765	737.994
ENSG00000148143	ZNF462	protein_coding	1.39115e-20	1.24638	2.37245	912.404	1104.44	1399.05	1362.18	537.447	603.941	460.254
ENSG00000122965	RBM19	protein_coding	1.10967e-12	0.622812	1.53987	909.752	1032.98	1189.61	1146.14	740.483	753.251	665.693
ENSG00000004468	CD38	protein_coding	6.36357e-27	1.14197	2.20682	900.574	1290.78	1517.53	1476.61	594.408	669.982	653.349
ENSG00000084207	GSTP1	protein_coding	3.05358e-16	0.843918	1.79492	896.191	1362.23	1188.41	1267.89	735.889	655.625	707.134
ENSG00000153707	PTPRD	protein_coding	2.68077e-38	1.55892	2.94634	874.863	1076.4	1367.93	1288.03	360.136	445.059	446.147
ENSG00000248837	RP11-412P11.1	lincRNA	3.34867e-12	1.28587	2.43829	859.728	1134.29	1476.84	1396.97	430.877	663.282	499.931
ENSG00000105967	TFEC	protein_coding	1.21398e-27	1.37156	2.5875	814.779	1262.73	1304.5	1253.24	459.357	499.615	496.404
ENSG00000111962	UST	protein_coding	1.62514e-13	0.824637	1.77109	750.283	955.192	1077.11	1095.79	520.911	628.826	587.221
ENSG00000241743	XACT	lincRNA	4.60053e-05	0.752654	1.68489	744.927	946.147	1306.9	1157.12	556.74	766.65	608.382
ENSG00000169136	ATF5	protein_coding	7.72389e-15	0.799613	1.74063	728.951	977.805	983.763	979.525	615.538	502.486	546.662
ENSG00000128512	DOCK4	protein_coding	9.30697e-10	0.776464	1.71293	721.826	831.27	1054.37	1033.54	522.748	592.455	551.071
ENSG00000261645	DISC1FP1	processed_transcript	4.73105e-08	0.923389	1.89657	721.24	828.557	1130.97	998.749	436.389	590.541	478.77
ENSG00000179873	NLRP11	protein_coding	2.18803e-85	1.63505	3.10599	701.518	1263.64	1146.53	1218.46	383.104	370.404	409.115
ENSG00000276476	LINC00540	lincRNA	0.00020851	0.741646	1.67208	677.35	716.394	1031.63	956.639	466.706	606.812	460.254
ENSG00000213047	DENND1B	protein_coding	5.84693e-118	2.24424	4.73788	675.412	1350.48	1406.23	1326.48	263.671	280.435	312.126
ENSG00000205035	RP11-707M1.1	transcribed_unprocessed_pseudogene	1.47936e-14	1.36953	2.58386	667.34	884.638	1132.17	1098.53	345.436	448.888	377.373
ENSG00000136010	ALDH1L2	protein_coding	4.61e-66	1.61077	3.05416	662.089	1056.5	1190.81	1067.41	342.68	372.318	361.502
ENSG00000183255	PTTG1IP	protein_coding	4.8945e-15	0.66223	1.58253	644.858	761.621	713.288	750.664	479.568	467.073	446.147
ENSG00000139197	PEX5	protein_coding	4.45221e-13	0.685444	1.6082	641.043	930.77	774.325	827.561	541.122	506.315	509.63
ENSG00000152061	RABGAP1L	protein_coding	8.13571e-06	0.60993	1.52618	638.8	618.704	767.144	759.818	433.633	463.244	468.19
ENSG00000278630	RP11-78L16.1	lincRNA	0.000252561	0.610985	1.5273	637.745	628.654	933.498	817.491	455.682	563.742	472.598
ENSG00000124788	ATXN1	protein_coding	0.000341175	0.620009	1.53688	634.535	758.003	1048.39	1020.72	504.374	707.309	546.662
ENSG00000126709	IFI6	protein_coding	1.20094e-15	0.942436	1.92177	622.195	959.715	916.743	912.697	556.74	424.96	445.265
ENSG00000138434	SSFA2	protein_coding	1.42793e-15	0.653245	1.5727	611.007	760.716	714.485	708.553	468.544	464.202	442.62
ENSG00000198040	ZNF84	protein_coding	1.00403e-18	0.751183	1.68317	605.889	716.394	774.325	721.37	423.527	454.63	421.459
ENSG00000155307	SAMSN1	protein_coding	1.01971e-32	1.12617	2.18279	600.85	945.242	1040.01	1018.89	455.682	420.174	485.824
ENSG00000172183	ISG20	protein_coding	4.12349e-11	0.726612	1.65475	590.081	912.679	786.292	806.506	530.098	479.515	480.534
ENSG00000244342	LINC00698	lincRNA	8.28724e-33	1.8918	3.71099	584.424	1116.2	1475.64	1367.67	327.981	384.761	335.933
ENSG00000214944	ARHGEF28	protein_coding	5.68287e-08	0.608523	1.5247	579.241	581.618	702.517	682.006	395.047	444.102	424.104
ENSG00000185483	ROR1	protein_coding	5.55059e-15	1.4427	2.71829	562.379	673.881	949.056	857.771	264.589	353.176	268.922
ENSG00000116667	C1orf21	protein_coding	1.9544e-12	1.05392	2.07616	559.458	676.594	879.642	925.514	339.924	441.231	385.309
ENSG00000176406	RIMS2	protein_coding	3.85642e-83	2.71216	6.55304	532.713	1197.61	1504.37	1400.63	164.45	211.523	243.353
ENSG00000234663	LINC01934	lincRNA	7.59381e-09	0.864198	1.82033	516.909	594.281	740.814	621.586	316.956	386.675	339.459
ENSG00000068079	IFI35	protein_coding	2.17474e-07	0.635111	1.55306	512.778	739.007	659.432	586.799	450.17	376.147	423.222
ENSG00000166750	SLFN5	protein_coding	5.14315e-13	0.750103	1.68191	491.255	578	557.705	542.858	314.2	313.934	354.449
ENSG00000186153	WWOX	protein_coding	7.19357e-08	1.0953	2.13657	475.369	499.305	762.357	796.436	270.102	334.034	318.298
ENSG00000089127	OAS1	protein_coding	1.37416e-26	1.19261	2.28565	472.725	700.112	752.782	743.34	321.55	295.749	330.642
ENSG00000147650	LRP12	protein_coding	8.04288e-11	0.922943	1.89598	464.673	555.386	674.991	616.094	305.932	309.149	335.051
ENSG00000115896	PLCL1	protein_coding	0.00146883	0.590263	1.50552	451.377	377.192	536.163	480.608	240.703	340.734	294.492
ENSG00000184743	ATL3	protein_coding	3.3134e-12	0.668463	1.58938	447.759	569.859	560.099	574.899	325.225	370.404	365.029
ENSG00000078328	RBFOX1	protein_coding	1.18189e-07	0.974004	1.96428	445.687	417.897	646.268	663.697	257.24	310.106	278.621
ENSG00000234281	LANCL1-AS1	antisense	1.80557e-06	0.750234	1.68207	443.883	518.3	642.677	617.924	290.313	404.86	326.234
ENSG00000163840	DTX3L	protein_coding	1.69815e-14	0.693696	1.61742	427.425	520.109	556.508	514.479	311.444	328.291	330.642
ENSG00000141576	RNF157	protein_coding	1.71927e-26	1.13154	2.19092	423.411	552.673	609.167	615.178	250.809	259.379	290.965
ENSG00000226022	AC026167.1	lincRNA	2.06829e-07	0.851373	1.80422	416.605	494.782	633.103	649.965	264.589	342.648	343.868
ENSG00000135916	ITM2C	protein_coding	4.83123e-12	0.973672	1.96383	414.517	590.663	531.376	539.196	316.956	217.265	291.847
ENSG00000064763	FAR2	protein_coding	6.35074e-26	1.33403	2.52106	404.274	529.155	678.581	680.175	236.109	259.379	241.589
ENSG00000084676	NCOA1	protein_coding	4.67168e-09	0.731257	1.66009	400.642	456.792	527.785	539.196	283.882	322.548	290.965
ENSG00000179915	NRXN1	protein_coding	1.31423e-13	0.944168	1.92408	383.799	521.918	575.657	589.546	255.402	319.677	284.793
ENSG00000198393	ZNF26	protein_coding	1.13925e-14	0.799343	1.74031	379.626	464.028	500.259	498.001	282.045	286.178	260.987
ENSG00000138496	PARP9	protein_coding	1.99164e-13	0.791555	1.73094	376.341	522.823	471.536	510.818	296.744	274.692	285.675
ENSG00000164199	ADGRV1	protein_coding	4.34425e-07	0.599117	1.51479	374.219	398.901	471.536	469.623	268.264	306.277	290.084
ENSG00000205045	SLFN12L	protein_coding	5.60131e-26	1.33355	2.52022	373.648	552.673	631.906	625.248	248.053	250.765	208.966
ENSG00000060709	RIMBP2	protein_coding	1.72346e-09	1.17755	2.26193	363.506	437.796	655.842	597.785	227.841	290.963	201.031
ENSG00000111110	PPM1H	protein_coding	5.71802e-15	0.93513	1.91206	354.954	389.856	497.866	477.862	235.191	235.451	230.127
ENSG00000177675	CD163L1	protein_coding	8.58496e-10	0.77277	1.70855	345.296	478.501	417.68	389.979	248.971	241.193	246.88
ENSG00000203386	LINC01317	lincRNA	2.8672e-06	0.830345	1.77811	326.408	420.61	566.083	528.211	241.622	322.548	253.933
ENSG00000106069	CHN2	protein_coding	5.54016e-05	0.86334	1.81924	321.859	279.502	396.138	439.413	179.149	234.494	165.762
ENSG00000226965	AC003088.1	lincRNA	2.46422e-05	0.775605	1.71191	319.394	340.106	404.516	388.148	190.174	243.108	199.267
ENSG00000073910	FRY	protein_coding	1.37592e-22	1.18338	2.27107	310.518	387.142	446.403	435.751	166.287	186.638	197.504
ENSG00000238129	RP3-410C9.2	lincRNA	3.09977e-13	0.819574	1.76488	307.449	426.037	393.745	396.387	224.166	215.351	238.944
ENSG00000007237	GAS7	protein_coding	1.99117e-18	1.07086	2.10068	302.055	397.997	411.696	416.527	199.361	200.037	175.461
ENSG00000162779	AXDND1	protein_coding	3.7815e-06	0.738735	1.66871	299.901	364.529	421.271	458.637	210.385	256.507	253.052
ENSG00000123496	IL13RA2	protein_coding	1.89099e-13	0.860193	1.81528	299.876	388.951	426.058	420.189	229.678	204.823	233.654
ENSG00000089169	RPH3A	protein_coding	4.06678e-12	1.52588	2.87963	298.958	415.183	604.38	650.88	164.45	220.137	173.697
ENSG00000183508	FAM46C	protein_coding	2.1366e-51	1.7425	3.34614	295.05	529.155	598.396	545.604	173.637	146.439	173.697
ENSG00000258590	NBEAP1	transcribed_unprocessed_pseudogene	7.94257e-10	0.880573	1.84111	294.398	379.001	457.175	432.089	205.792	223.965	240.708
ENSG00000229715	EEF1DP3	transcribed_unprocessed_pseudogene	3.73851e-08	1.34271	2.53628	287.538	292.166	475.126	438.498	122.189	203.866	125.203
ENSG00000083844	ZNF264	protein_coding	8.52636e-17	0.990791	1.98727	282.255	366.338	411.696	355.192	190.174	200.037	170.171
ENSG00000235385	LINC02154	lincRNA	6.27435e-49	1.94847	3.85965	272.564	408.851	371.006	400.964	90.0339	98.583	113.741
ENSG00000136261	BZW2	protein_coding	1.0695e-20	1.07568	2.10771	270.034	502.019	416.484	454.976	218.654	218.223	207.203
ENSG00000172572	PDE3A	protein_coding	7.16446e-11	0.895785	1.86062	269.77	282.216	323.134	282.872	148.832	146.439	169.289
ENSG00000249645	RP11-552M14.1	lincRNA	3.78524e-22	1.18902	2.27998	261.05	360.911	390.154	368.924	150.669	176.109	156.945
ENSG00000198795	ZNF521	protein_coding	2.04843e-37	1.83475	3.56709	244.815	312.066	376.99	353.361	98.3023	97.6259	91.6981
ENSG00000170381	SEMA3E	protein_coding	3.85089e-11	0.981201	1.97411	240.072	338.297	428.452	353.361	179.149	185.681	186.923
ENSG00000162434	JAK1	protein_coding	4.41668e-21	1.25658	2.38928	237.114	308.447	385.367	346.953	137.807	149.31	140.192
ENSG00000249196	RP11-669N7.2	antisense	1.64082e-17	1.36175	2.56997	233.9	319.302	284.837	344.207	148.832	99.5401	112.859
ENSG00000148429	USP6NL	protein_coding	8.33445e-08	0.779548	1.71659	230.488	262.316	290.82	309.42	160.775	178.024	149.891
ENSG00000072657	TRHDE	protein_coding	1.69815e-14	1.26889	2.40977	228.249	283.12	344.676	328.644	112.083	149.31	125.203
ENSG00000215808	LINC01139	lincRNA	1.39124e-08	0.808428	1.7513	227.867	250.557	275.262	258.155	145.157	148.353	141.956
ENSG00000117228	GBP1	protein_coding	5.8148e-26	1.1701	2.25028	226.059	399.806	393.745	374.416	168.125	173.238	171.052
ENSG00000196387	ZNF140	protein_coding	1.64468e-11	0.883009	1.84422	221.505	276.789	299.198	297.519	158.019	148.353	156.945
ENSG00000102547	CAB39L	protein_coding	3.83095e-09	0.755001	1.68763	220.757	274.075	296.804	265.479	155.263	176.109	152.536
ENSG00000169372	CRADD	protein_coding	1.99874e-05	0.777131	1.71372	215.967	212.566	314.756	311.251	143.319	159.838	163.999
ENSG00000001036	FUCA2	protein_coding	1.65674e-09	0.804181	1.74615	215.898	278.598	275.262	272.802	173.637	145.482	142.837
ENSG00000156113	KCNMA1	protein_coding	3.1596e-49	2.96863	7.8279	214.659	370.861	506.243	484.27	48.6918	63.1697	57.3113
ENSG00000248300	RP11-74M11.2	lincRNA	6.43952e-08	1.06251	2.08856	212.109	236.989	331.511	287.449	111.164	145.482	135.784
ENSG00000253649	PRSS51	protein_coding	5.52768e-05	0.619227	1.53605	206.938	227.944	287.23	281.957	147.913	178.024	174.579
ENSG00000133106	EPSTI1	protein_coding	1.5875e-13	0.996926	1.99574	206.358	265.03	305.182	324.983	131.376	154.096	153.418
ENSG00000106066	CPVL	protein_coding	4.19839e-14	0.980331	1.97292	203.688	238.798	256.114	239.846	120.351	118.682	125.203
ENSG00000147206	NXF3	protein_coding	6.33867e-14	1.03422	2.04801	200.43	293.07	244.146	282.872	133.213	138.782	121.676
ENSG00000227863	AC002383.2	lincRNA	3.45064e-13	0.971698	1.96115	200.375	284.929	299.198	303.927	131.376	170.367	141.956
ENSG00000233067	PTCHD1-AS	lincRNA	2.66871e-05	0.664958	1.58552	198.934	284.929	356.644	340.545	171.799	218.223	206.321
ENSG00000118689	FOXO3	protein_coding	2.78629e-16	1.35401	2.55622	197.857	261.411	315.953	323.152	96.4649	125.382	121.676
ENSG00000188906	LRRK2	protein_coding	1.42249e-18	1.20257	2.3015	191.961	248.748	232.178	237.1	103.815	99.5401	103.16
ENSG00000138760	SCARB2	protein_coding	1.19718e-21	1.39761	2.63464	189.324	261.411	289.624	279.21	101.977	89.0118	117.268
ENSG00000169715	MT1E	protein_coding	6.03356e-08	1.03068	2.04298	188.907	307.543	238.162	250.832	144.238	133.039	98.7518
ENSG00000250137	RP11-380P13.1	antisense	7.57048e-07	1.02326	2.03251	185.79	189.953	323.134	288.365	113.002	124.425	137.547
ENSG00000121858	TNFSF10	protein_coding	1.23628e-20	1.23606	2.35554	181.574	307.543	302.788	282.872	135.97	112.94	123.44
ENSG00000153930	ANKFN1	protein_coding	1.20868e-18	1.48125	2.7919	180.552	263.221	354.25	348.784	113.92	126.339	97.8701
ENSG00000247809	NR2F2-AS1	antisense	1.0757e-10	1.02086	2.02913	179.916	228.848	274.065	250.832	107.489	137.825	115.504
ENSG00000135549	PKIB	protein_coding	3.50619e-07	0.706505	1.63185	178.897	261.411	263.294	266.394	131.376	165.581	174.579
ENSG00000275443	RP11-759A24.3	lincRNA	6.98983e-05	0.854407	1.80802	177.48	217.089	245.342	246.254	113.92	156.01	100.515
ENSG00000198752	CDC42BPB	protein_coding	1.1944e-13	1.13893	2.20218	177.06	206.235	278.853	243.508	112.083	110.068	99.6336
ENSG00000156011	PSD3	protein_coding	6.41725e-12	1.04026	2.05659	176.443	268.648	260.901	328.644	120.351	148.353	139.311
ENSG00000181804	SLC9A9	protein_coding	3.97987e-18	1.60746	3.04715	175.244	224.325	315.953	292.027	76.2532	91.8832	96.9884
ENSG00000064225	ST3GAL6	protein_coding	1.48833e-20	1.35459	2.55724	174.281	278.598	287.23	303.012	99.2211	119.64	114.623
ENSG00000183647	ZNF530	protein_coding	2.32744e-05	0.625705	1.54297	172.147	219.803	195.077	198.651	134.132	129.211	122.558
ENSG00000172164	SNTB1	protein_coding	5.60307e-23	1.97889	3.94189	171.688	256.889	307.576	296.604	68.9035	67.9553	75.8273
ENSG00000136147	PHF11	protein_coding	4.55408e-07	0.788941	1.72781	167.383	200.807	236.965	208.721	112.083	126.339	122.558
ENSG00000154645	CHODL	protein_coding	1.81231e-07	0.951295	1.93361	163.549	238.798	253.72	231.607	101.058	133.996	125.203
ENSG00000236333	TRHDE-AS1	processed_transcript	4.43584e-11	1.03855	2.05416	162.661	211.662	193.88	227.03	96.4649	104.326	99.6336
ENSG00000115414	FN1	protein_coding	1.68861e-05	0.625653	1.54291	162.141	176.385	175.928	201.398	124.945	112.94	110.214
ENSG00000152413	HOMER1	protein_coding	5.77956e-07	0.705218	1.63039	161.377	226.134	252.523	224.284	128.62	136.868	152.536
ENSG00000160505	NLRP4	protein_coding	4.74881e-23	1.66022	3.16064	160.452	171.862	187.896	188.581	61.5538	47.8558	59.9565
ENSG00000060558	GNA15	protein_coding	3.42287e-10	0.86722	1.82414	159.703	241.512	245.342	229.776	142.401	118.682	121.676
ENSG00000170624	SGCD	protein_coding	3.39421e-38	3.15543	8.91	158.862	267.743	385.367	365.262	27.5614	48.8129	35.2685
ENSG00000132530	XAF1	protein_coding	8.97362e-18	1.41125	2.65968	158.201	215.28	263.294	229.776	86.3591	98.583	74.9456
ENSG00000257221	RP11-689B22.2	antisense	1.71593e-05	0.731005	1.6598	157.587	169.149	151.993	173.019	98.3023	102.411	86.4079
ENSG00000204442	FAM155A	protein_coding	8.02434e-17	1.39298	2.6262	155.632	243.321	270.475	305.758	98.3023	99.5401	106.687
ENSG00000163285	GABRG1	protein_coding	3.29038e-21	1.66026	3.16074	150.524	351.865	287.23	272.802	105.652	77.5264	98.7518
ENSG00000114757	PEX5L	protein_coding	3.5298e-07	0.846416	1.79803	149.944	188.144	240.555	230.692	108.408	118.682	126.085
ENSG00000204271	SPIN3	protein_coding	7.22412e-11	0.973116	1.96308	149.617	212.566	203.455	178.512	94.6275	107.197	93.4616
ENSG00000168491	CCDC110	protein_coding	2.25804e-05	0.739234	1.66929	148.231	177.289	160.37	173.934	97.3836	94.7545	102.279
ENSG00000007174	DNAH9	protein_coding	2.71742e-23	1.49536	2.81934	147.347	256.889	239.358	254.493	77.1719	93.7974	90.8164
ENSG00000154265	ABCA5	protein_coding	1.2319e-11	1.07703	2.10968	146.392	215.28	210.635	216.045	95.5462	95.7117	104.924
ENSG00000129422	MTUS1	protein_coding	7.21772e-17	1.36436	2.57462	144.351	211.662	201.061	227.945	82.6842	84.2263	76.709
ENSG00000059378	PARP12	protein_coding	5.87475e-07	0.823154	1.76927	143.204	174.576	214.226	212.383	101.058	105.283	120.795
ENSG00000152578	GRIA4	protein_coding	9.46838e-11	1.08368	2.11944	142.943	268.648	259.704	247.17	89.1152	130.168	135.784
ENSG00000256771	ZNF253	protein_coding	2.83506e-08	0.878341	1.83826	141.039	203.521	180.716	162.034	98.3023	92.8403	96.9884
ENSG00000019991	HGF	protein_coding	2.84257e-49	3.00392	8.02178	140.439	282.216	242.949	247.17	30.3175	37.3275	27.3331
ENSG00000242808	SOX2-OT	sense_overlapping	6.0921e-13	1.12999	2.18858	137.038	217.089	220.21	213.298	90.0339	112.94	87.2896
ENSG00000146530	VWDE	protein_coding	1.15793e-11	1.21858	2.32717	129.882	199.903	244.146	182.173	89.1152	83.2691	87.2896
ENSG00000111666	CHPT1	protein_coding	2.46926e-09	1.06223	2.08816	125.114	160.103	179.519	205.975	82.6842	71.7837	97.8701
ENSG00000180229	HERC2P3	transcribed_unprocessed_pseudogene	4.75051e-09	1.17832	2.26313	120.838	161.912	207.045	206.89	67.0661	85.1834	91.6981
ENSG00000277693	AP003900.6	lincRNA	9.28093e-08	1.27743	2.42406	120.476	161.008	199.864	159.287	47.7731	86.1405	69.6553
ENSG00000204634	TBC1D8	protein_coding	0.00021983	0.766372	1.70099	118.586	92.2629	118.482	129.078	61.5538	64.1268	62.6016
ENSG00000267041	ZNF850	protein_coding	1.03512e-06	0.809128	1.75215	117.589	142.012	167.551	160.203	80.8468	88.0547	89.053
ENSG00000159216	RUNX1	protein_coding	1.32518e-06	1.17577	2.25913	116.491	122.113	184.306	167.526	58.7977	74.6551	64.365
ENSG00000131981	LGALS3	protein_coding	0.000121592	0.699778	1.62425	115.438	154.676	157.977	142.809	98.3023	86.1405	82.881
ENSG00000155761	SPAG17	protein_coding	0.00237748	0.609839	1.52609	114.641	115.781	140.025	149.217	75.3345	98.583	75.8273
ENSG00000163818	LZTFL1	protein_coding	1.16252e-08	1.21336	2.31876	112.432	97.6901	132.844	98.8679	38.586	50.7272	45.8491
ENSG00000121406	ZNF549	protein_coding	0.000423006	0.65509	1.57471	110.471	121.208	159.173	123.585	89.1152	75.6122	77.5907
ENSG00000185630	PBX1	protein_coding	3.74e-05	0.813149	1.75704	109.558	122.113	157.977	157.456	68.9035	89.969	77.5907
ENSG00000233922	LINC01694	lincRNA	0.000115967	0.669961	1.59103	107.317	136.585	129.254	138.232	87.2778	83.2691	73.1822
ENSG00000211632	IGKV3D-11	IG_V_gene	0.0215163	0.729123	1.65763	106.723	113.067	142.418	134.57	83.6029	42.1131	74.9456
ENSG00000261122	LINC02167	lincRNA	4.11845e-05	0.753698	1.68611	106.321	119.399	142.418	155.625	80.8468	85.1834	70.537
ENSG00000165914	TTC7B	protein_coding	0.000112783	0.871477	1.82954	105.847	107.64	172.338	171.188	66.1474	89.0118	75.8273
ENSG00000069974	RAB27A	protein_coding	6.48743e-05	0.72168	1.6491	104.814	125.731	156.78	145.556	70.7409	93.7974	82.881
ENSG00000180772	AGTR2	protein_coding	1.88131e-06	0.890454	1.85376	103.258	189.048	157.977	163.864	73.4971	82.312	108.451
ENSG00000139352	ASCL1	protein_coding	3.7345e-19	1.82574	3.5449	102.943	190.857	154.386	155.625	50.5292	42.1131	44.9674
ENSG00000258231	RP11-362K2.2	lincRNA	2.16964e-39	3.7437	13.3957	101.8	181.812	293.214	245.339	20.2117	17.2281	14.9891
ENSG00000126778	SIX1	protein_coding	3.23741e-05	0.791587	1.73098	101.792	115.781	104.121	136.401	69.8222	56.4699	70.537
ENSG00000081377	CDC14B	protein_coding	0.00034219	0.63954	1.55783	101.197	142.012	165.157	152.879	86.3591	98.583	96.1067
ENSG00000150054	MPP7	protein_coding	9.8945e-13	1.46581	2.76219	97.3284	168.244	180.716	211.467	67.9848	48.8129	78.4724
ENSG00000231877	RP11-177F15.1	lincRNA	0.00103091	0.736908	1.6666	96.9984	94.0719	105.318	120.839	44.0982	55.5128	79.3542
ENSG00000010810	FYN	protein_coding	1.2668e-11	1.31254	2.48379	96.6424	129.349	189.093	170.273	63.3912	66.9982	59.0748
ENSG00000125675	GRIA3	protein_coding	2.91143e-06	1.07575	2.10781	95.6154	109.449	129.254	103.445	60.6351	38.2847	53.7845
ENSG00000175265	GOLGA8A	protein_coding	3.7162e-06	0.87481	1.83377	94.2227	108.545	122.073	135.486	59.7164	67.9553	63.4833
ENSG00000185745	IFIT1	protein_coding	8.02282e-06	0.915444	1.88615	93.0207	152.867	116.089	140.063	74.4158	65.0839	67.8919
ENSG00000234323	LINC01505	lincRNA	0.0061952	0.696573	1.62065	92.6795	100.404	159.173	135.486	58.7977	89.969	72.3005
ENSG00000274090	RP11-415G4.1	lincRNA	3.98777e-11	1.5736	2.97647	92.5536	133.872	132.844	146.471	36.7485	44.9845	51.1393
ENSG00000116977	LGALS8	protein_coding	2.82795e-09	1.17808	2.26275	91.7788	130.253	113.695	119.923	52.3667	52.6414	50.2576
ENSG00000255442	RP11-347H15.1	unprocessed_pseudogene	2.79147e-09	1.38393	2.60979	91.489	100.404	110.105	118.092	34.9111	40.1989	44.9674
ENSG00000184979	USP18	protein_coding	9.07828e-09	1.07313	2.10399	89.0686	150.153	125.663	151.048	71.6596	58.3841	66.1285
ENSG00000166676	TVP23A	protein_coding	4.58559e-07	0.933115	1.90939	88.7278	144.726	134.041	151.048	88.1965	63.1697	65.2468
ENSG00000100154	TTC28	protein_coding	3.95431e-17	2.12481	4.36147	88.0438	157.39	258.507	198.651	32.155	57.427	45.8491
ENSG00000153237	CCDC148	protein_coding	1.3674e-08	1.15919	2.23332	86.1311	99.4992	116.089	120.839	43.1795	55.5128	45.8491
ENSG00000081052	COL4A4	protein_coding	1.88209e-35	3.22866	9.37399	85.2938	132.063	142.418	150.133	13.7807	14.3567	15.8708
ENSG00000257191	RP11-390N6.1	antisense	0.00285606	0.624537	1.54172	85.2819	101.308	129.254	113.515	61.5538	84.2263	62.6016
ENSG00000130707	ASS1	protein_coding	2.76081e-08	1.02266	2.03166	84.5218	139.299	134.041	132.739	68.9035	57.427	66.1285
ENSG00000168778	TCTN2	protein_coding	0.000242747	0.758533	1.69177	84.2926	111.258	90.9562	115.346	70.7409	54.5556	52.9028
ENSG00000271147	ARMCX5-GPRASP2	processed_transcript	0.00279327	0.634271	1.55215	83.9836	96.7856	135.238	120.839	59.7164	83.2691	68.7736
ENSG00000186020	ZNF529	protein_coding	3.46303e-05	0.825806	1.77252	83.8542	112.163	126.86	114.43	56.9602	63.1697	68.7736
ENSG00000066294	CD84	protein_coding	0.00319369	0.624938	1.54214	82.5997	119.399	123.27	144.64	79.0094	77.5264	78.4724
ENSG00000135457	TFCP2	protein_coding	3.86196e-06	1.02154	2.03009	82.3102	92.2629	123.27	113.515	39.5047	49.7701	63.4833
ENSG00000185432	METTL7A	protein_coding	0.00535136	0.625928	1.5432	80.1385	114.876	89.7594	87.8826	61.5538	51.6843	62.6016
ENSG00000250038	RP11-180C1.1	lincRNA	5.44386e-07	1.0523	2.07384	78.9217	80.5039	92.153	91.5444	46.8544	36.3704	37.9137
ENSG00000148541	FAM13C	protein_coding	0.00024882	0.779056	1.71601	77.9474	89.5493	111.302	97.9525	56.0415	49.7701	57.3113
ENSG00000146409	SLC18B1	protein_coding	4.98189e-09	1.28845	2.44265	76.5239	119.399	96.9402	117.177	42.2608	42.1131	46.7308
ENSG00000137628	DDX60	protein_coding	0.00167204	0.613199	1.52965	76.2772	114.876	111.302	97.037	59.7164	72.7409	67.0102
ENSG00000103174	NAGPA	protein_coding	0.0059953	0.597569	1.51317	75.2	99.4992	94.5466	81.4745	60.6351	57.427	51.1393
ENSG00000128791	TWSG1	protein_coding	3.93131e-05	0.912511	1.88232	75.0097	109.449	134.041	122.669	53.2854	51.6843	77.5907
ENSG00000106605	BLVRA	protein_coding	9.24279e-05	0.836974	1.7863	74.9271	123.922	93.3498	113.515	54.2041	67.9553	53.7845
ENSG00000184588	PDE4B	protein_coding	0.000153583	0.792056	1.73154	72.4541	104.022	81.3819	105.276	53.2854	46.8987	59.0748
ENSG00000256725	RP11-662M24.2	lincRNA	0.000511562	1.32901	2.5123	71.1262	75.9812	137.631	143.725	42.2608	54.5556	28.2148
ENSG00000259702	RP11-236L14.1	lincRNA	1.18917e-06	0.997663	1.99676	70.8841	105.831	95.7434	103.445	56.0415	45.9416	44.0856
ENSG00000169245	CXCL10	protein_coding	7.4973e-06	1.00739	2.01027	70.291	148.344	120.876	149.217	75.3345	47.8558	74.0639
ENSG00000224957	LINC01266	lincRNA	0.000398816	0.82401	1.77032	70.2028	79.5993	102.924	100.699	44.0982	54.5556	50.2576
ENSG00000262660	RP13-1032I1.10	protein_coding	0.000653363	0.849847	1.80231	68.8598	75.9812	114.892	88.798	47.7731	52.6414	42.3222
ENSG00000229358	DPY19L1P1	unprocessed_pseudogene	0.00450228	0.667666	1.5885	68.5156	76.8857	105.318	100.699	52.3667	58.3841	52.9028
ENSG00000196437	ZNF569	protein_coding	8.26501e-05	0.857716	1.81217	68.4707	104.022	96.9402	85.1363	45.017	52.6414	51.1393
ENSG00000214510	SPINK13	protein_coding	0.000954456	0.852548	1.80569	67.6927	66.0313	110.105	92.4598	35.8298	53.5985	46.7308
ENSG00000166603	MC4R	protein_coding	4.04407e-20	3.02844	8.15927	66.9205	82.3129	69.4139	105.276	11.9433	9.57117	8.81713
ENSG00000266560	RP11-1007I13.4	processed_transcript	3.74e-05	0.976917	1.96825	66.7629	102.213	89.7594	73.2355	43.1795	34.4562	48.4942
ENSG00000141540	TTYH2	protein_coding	0.000888248	0.755471	1.68818	65.6065	100.404	99.3337	86.9672	49.6105	60.2983	48.4942
ENSG00000111404	RERGL	protein_coding	0.000414021	0.784963	1.72305	64.841	92.2629	106.514	113.515	54.2041	53.5985	61.7199
ENSG00000260517	RP11-426C22.5	lincRNA	0.0031902	1.12585	2.1823	64.0129	61.5086	134.041	123.585	35.8298	60.2983	29.0965
ENSG00000177138	FAM9B	protein_coding	0.00452107	0.673493	1.59493	62.7798	108.545	78.9883	92.4598	57.8789	50.7272	53.7845
ENSG00000204434	POTEKP	unprocessed_pseudogene	0.00371327	0.71265	1.63881	62.3071	68.7449	69.4139	72.3201	41.3421	48.8129	28.2148
ENSG00000154429	CCSAP	protein_coding	2.72676e-05	0.961219	1.94695	59.08	92.2629	89.7594	86.0517	43.1795	48.8129	37.9137
ENSG00000100867	DHRS2	protein_coding	5.40742e-06	1.18503	2.27368	58.4857	68.7449	64.6268	60.4193	24.8053	23.9279	30.86
ENSG00000119772	DNMT3A	protein_coding	0.00647267	0.673151	1.59455	57.7858	77.7903	82.5787	76.8973	35.8298	47.8558	52.0211
ENSG00000257894	RP1-78O14.1	lincRNA	0.00419591	0.801001	1.74231	57.1341	63.3177	90.9562	75.0664	38.586	46.8987	32.6234
ENSG00000231937	RP11-329E24.6	antisense	0.0128273	0.769424	1.70459	57.1279	65.1267	89.7594	83.3054	22.9678	52.6414	45.8491
ENSG00000160999	SH2B2	protein_coding	0.00789979	0.62987	1.54743	56.8787	85.9311	64.6268	72.3201	40.4234	42.1131	50.2576
ENSG00000074706	IPCEF1	protein_coding	4.89912e-05	0.976802	1.9681	56.7511	73.2676	69.4139	84.2208	31.2363	38.2847	38.7954
ENSG00000075240	GRAMD4	protein_coding	0.00367941	0.658918	1.5789	56.5116	85.9311	71.8075	77.8127	52.3667	48.8129	37.9137
ENSG00000232591	RP5-1031D4.2	lincRNA	0.000224355	0.896555	1.86161	56.2269	66.9358	86.169	78.7282	43.1795	30.6277	41.4405
ENSG00000111752	PHC1	protein_coding	0.0141549	0.58902	1.50422	54.4635	72.363	69.4139	65.9119	37.6673	47.8558	40.5588
ENSG00000243440	AF165138.7	protein_coding	0.00018874	0.894008	1.85833	54.1676	101.308	110.105	90.6289	38.586	53.5985	59.0748
ENSG00000105708	ZNF14	protein_coding	0.000501508	0.876014	1.8353	53.4543	72.363	63.43	76.8973	33.9924	43.0702	30.86
ENSG00000145526	CDH18	protein_coding	1.16271e-05	1.15643	2.22905	52.8788	75.9812	80.1851	86.9672	40.4234	28.7135	32.6234
ENSG00000136267	DGKB	protein_coding	3.05339e-06	1.45914	2.74944	52.8761	66.0313	87.3658	86.9672	28.4801	21.0566	30.86
ENSG00000101916	TLR8	protein_coding	2.56231e-20	4.97218	31.3889	52.5133	78.6948	96.9402	103.445	0.918713	3.82847	3.52685
ENSG00000092929	UNC13D	protein_coding	0.000173792	0.8962	1.86116	52.3242	66.0313	73.0043	68.6583	33.9924	37.3275	32.6234
ENSG00000112541	PDE10A	protein_coding	0.0191457	0.611317	1.52765	52.1375	55.1768	88.5626	81.4745	37.6673	50.7272	43.2039
ENSG00000139144	PIK3C2G	protein_coding	0.000550157	0.842022	1.79256	50.8159	75.9812	81.3819	75.9818	38.586	48.8129	33.5051
ENSG00000197863	ZNF790	protein_coding	0.0066673	0.668418	1.58933	49.8788	62.4131	69.4139	62.2502	33.9924	43.0702	34.3868
ENSG00000164418	GRIK2	protein_coding	4.41437e-14	2.16559	4.48651	48.9832	94.0719	131.647	99.7834	19.293	24.885	24.688
ENSG00000184613	NELL2	protein_coding	0.00120416	0.911179	1.88058	47.7941	50.6541	80.1851	77.8127	33.0737	40.1989	27.3331
ENSG00000224559	LINC01087	lincRNA	0.0446121	0.621396	1.53836	47.3697	34.3724	41.8877	54.9266	22.0491	23.9279	25.5697
ENSG00000197381	ADARB1	protein_coding	0.00988803	0.777888	1.71462	47.3045	40.7042	34.707	59.5038	22.9678	25.8421	21.1611
ENSG00000101236	RNF24	protein_coding	0.0171007	0.619577	1.53642	46.623	47.9405	70.6107	55.8421	33.0737	35.4133	32.6234
ENSG00000204147	ASAH2B	protein_coding	0.00173317	0.875063	1.83409	46.4673	71.4585	61.0364	60.4193	31.2363	36.3704	28.2148
ENSG00000101187	SLCO4A1	protein_coding	9.73001e-05	1.04643	2.06542	45.8066	68.7449	80.1851	67.7428	32.155	41.156	23.8062
ENSG00000145416	MARCH1	protein_coding	0.00097434	0.892065	1.85583	45.6184	71.4585	55.0524	64.0811	30.3175	27.7564	36.1502
ENSG00000142875	PRKACB	protein_coding	0.00428832	0.734366	1.66367	45.0388	60.604	73.0043	60.4193	32.155	43.0702	30.86
ENSG00000067182	TNFRSF1A	protein_coding	0.00957194	0.752738	1.68499	44.7807	65.1267	68.2172	50.3494	35.8298	29.6706	30.86
ENSG00000235448	LURAP1L-AS1	antisense	0.00456827	0.684656	1.60732	43.4597	64.2222	78.9883	66.8274	41.3421	41.156	37.0319
ENSG00000152503	TRIM36	protein_coding	0.00142392	0.90806	1.87652	42.9765	55.1768	68.2172	46.6876	21.1304	27.7564	32.6234
ENSG00000197872	FAM49A	protein_coding	0.0125058	0.679269	1.60133	42.9094	64.2222	51.4621	59.5038	33.0737	32.542	32.6234
ENSG00000144481	TRPM8	protein_coding	1.10967e-12	2.10764	4.30986	42.682	99.4992	76.5947	64.9965	17.4556	17.2281	18.516
ENSG00000166352	C11orf74	protein_coding	1.75201e-05	1.21953	2.32871	42.3934	66.9358	50.2653	54.9266	24.8053	22.0137	22.0428
ENSG00000248869	RP11-138I17.1	lincRNA	1.1127e-08	1.74697	3.35652	42.3327	62.4131	92.153	61.3347	22.9678	21.0566	15.8708
ENSG00000133065	SLC41A1	protein_coding	0.00213072	0.823303	1.76945	42.1186	57.8904	74.2011	73.2355	32.155	32.542	40.5588
ENSG00000169306	IL1RAPL1	protein_coding	0.000248909	1.0883	2.12623	41.6277	58.795	64.6268	84.2208	23.8865	36.3704	29.0965
ENSG00000150907	FOXO1	protein_coding	0.0062122	0.78139	1.71879	41.5398	56.0813	62.2332	69.5737	29.3988	44.0274	24.688
ENSG00000172123	SLFN12	protein_coding	0.000373718	0.972287	1.96195	41.4501	60.604	51.4621	61.3347	21.1304	24.885	35.2685
ENSG00000135114	OASL	protein_coding	0.0277975	0.615346	1.53193	40.4893	67.8403	59.8396	55.8421	32.155	28.7135	44.0856
ENSG00000163297	ANTXR2	protein_coding	3.19253e-08	1.58282	2.99554	40.3816	56.9859	73.0043	75.0664	17.4556	21.0566	25.5697
ENSG00000226785	AC073218.1	lincRNA	2.4064e-06	1.44007	2.71334	39.7815	48.845	76.5947	71.4046	19.293	20.0994	27.3331
ENSG00000135919	SERPINE2	protein_coding	0.0107038	0.653039	1.57248	39.4467	65.1267	81.3819	74.1509	43.1795	38.2847	44.9674
ENSG00000164951	PDP1	protein_coding	0.00877678	0.75267	1.68491	39.3074	56.0813	44.2813	46.6876	22.0491	25.8421	29.9782
ENSG00000244676	AL109761.5	antisense	0.000575014	1.16653	2.24471	38.7867	36.1815	74.2011	62.2502	22.9678	24.885	20.2794
ENSG00000169554	ZEB2	protein_coding	0.000894492	0.919327	1.89123	38.3529	51.5587	63.43	54.9266	24.8053	27.7564	29.0965
ENSG00000259348	RP11-4G2.1	lincRNA	0.000152778	1.06713	2.09526	38.2685	56.0813	61.0364	46.6876	22.9678	22.0137	26.4514
ENSG00000223883	LINC01707	lincRNA	0.0119045	0.7325	1.66152	38.0696	54.2723	44.2813	64.9965	26.6427	37.3275	23.8062
ENSG00000171487	NLRP5	protein_coding	2.05247e-13	4.02663	16.2981	38.0529	54.2723	38.2973	70.4892	4.59357	2.87135	1.76343
ENSG00000182463	TSHZ2	protein_coding	8.32223e-11	2.41508	5.3335	37.7942	64.2222	94.5466	78.7282	9.18713	17.2281	14.9891
ENSG00000140986	RPL3L	protein_coding	0.0045397	0.780344	1.71754	37.7704	52.4632	52.6589	54.0112	33.9924	26.7993	22.9245
ENSG00000183117	CSMD1	protein_coding	1.42817e-14	2.53632	5.80107	37.7073	65.1267	80.1851	74.1509	10.1058	10.5283	14.9891
ENSG00000169126	ARMC4	protein_coding	7.32718e-15	2.35903	5.13024	37.4332	68.7449	82.5787	81.4745	13.7807	14.3567	14.9891
ENSG00000274497	IGHG2	IG_C_gene	0.0266783	0.61261	1.52902	37.0819	46.1314	46.6749	45.7722	29.3988	23.9279	26.4514
ENSG00000143367	TUFT1	protein_coding	0.0013211	0.927375	1.90181	37.0155	49.7496	58.6428	66.8274	32.155	22.0137	29.0965
ENSG00000061676	NCKAP1	protein_coding	6.60679e-09	1.91778	3.77842	36.1711	79.5993	50.2653	62.2502	22.9678	12.4425	12.344
ENSG00000148948	LRRC4C	protein_coding	4.58028e-08	1.80726	3.49976	35.3046	59.6995	65.8236	58.5884	15.6181	21.0566	12.344
ENSG00000091490	SEL1L3	protein_coding	4.22659e-06	1.29473	2.45332	35.1809	70.554	81.3819	64.0811	22.9678	28.7135	29.9782
ENSG00000112303	VNN2	protein_coding	1.01747e-09	2.06192	4.17541	34.7846	59.6995	57.446	66.8274	15.6181	10.5283	14.9891
ENSG00000107518	ATRNL1	protein_coding	0.0235288	0.647365	1.56631	34.5856	44.3224	57.446	59.5038	32.155	28.7135	29.0965
ENSG00000238193	RP11-555H23.1	processed_pseudogene	0.00180339	0.932914	1.90913	34.3673	49.7496	55.0524	51.2648	33.9924	17.2281	22.0428
ENSG00000168118	RAB4A	protein_coding	1.16495e-05	1.38591	2.61336	33.9305	54.2723	50.2653	49.434	20.2117	16.271	17.6343
ENSG00000160791	CCR5	protein_coding	0.00380343	0.911212	1.88062	33.8697	67.8403	67.0204	37.5332	25.724	26.7993	28.2148
ENSG00000169031	COL4A3	protein_coding	1.27695e-14	2.92425	7.59079	33.2266	54.2723	69.4139	62.2502	8.26842	6.69982	7.93542
ENSG00000257681	RP11-341G23.4	antisense	0.0279305	0.668291	1.58919	32.6228	40.7042	44.2813	44.8567	21.1304	33.4991	15.8708
ENSG00000136514	RTP4	protein_coding	0.00815349	0.846349	1.79794	32.2042	37.0861	47.8717	51.2648	27.5614	16.271	22.0428
ENSG00000115641	FHL2	protein_coding	0.00144582	1.01628	2.0227	32.0425	40.7042	43.0845	51.2648	24.8053	19.1423	15.8708
ENSG00000276787	FAN1	protein_coding	0.00772396	0.80356	1.7454	31.681	45.2269	39.4941	38.4486	20.2117	22.9708	19.3977
ENSG00000233359	RP11-202K23.1	lincRNA	0.016948	0.753166	1.68549	31.664	49.7496	73.0043	47.6031	27.5614	33.4991	25.5697
ENSG00000117226	GBP3	protein_coding	0.0404831	0.621774	1.53877	31.6182	47.9405	33.5102	46.6876	27.5614	17.2281	26.4514
ENSG00000171617	ENC1	protein_coding	0.0430715	0.60489	1.52086	31.5454	42.5133	34.707	42.1104	21.1304	25.8421	20.2794
ENSG00000240108	NCOR1P1	transcribed_unprocessed_pseudogene	0.00768115	0.912386	1.88216	31.4696	32.5634	56.2492	54.0112	15.6181	22.0137	27.3331
ENSG00000250590	RP11-565A3.2	lincRNA	0.000281236	1.19559	2.29039	31.4242	43.4178	68.2172	66.8274	21.1304	26.7993	22.0428
ENSG00000256994	RP11-871F6.3	lincRNA	0.0112746	0.848002	1.80001	31.3884	45.2269	69.4139	43.9413	22.9678	21.0566	30.86
ENSG00000114948	ADAM23	protein_coding	0.0366206	0.645492	1.56427	31.1997	37.9906	29.9198	43.0259	25.724	14.3567	20.2794
ENSG00000227745	AC098826.5	unprocessed_pseudogene	5.50062e-07	1.95343	3.87295	30.9526	42.5133	65.8236	57.673	14.6994	19.1423	5.29028
ENSG00000255693	RP11-766N7.3	lincRNA	2.32126e-05	1.59861	3.0285	30.7436	29.8498	47.8717	32.0405	9.18713	14.3567	8.81713
ENSG00000008311	AASS	protein_coding	3.06088e-06	1.42967	2.69384	30.0819	51.5587	53.8556	52.1803	16.5368	17.2281	20.2794
ENSG00000122870	BICC1	protein_coding	0.0419589	0.675392	1.59703	29.0962	20.8044	35.9038	24.717	11.0246	15.3139	14.9891
ENSG00000110002	VWA5A	protein_coding	0.00237748	1.04822	2.06797	28.8316	52.4632	32.3134	47.6031	15.6181	14.3567	26.4514
ENSG00000136244	IL6	protein_coding	0.0112777	0.775027	1.71122	28.702	40.7042	38.2973	35.7023	20.2117	19.1423	19.3977
ENSG00000221968	FADS3	protein_coding	0.0013843	1.05851	2.08278	28.4996	39.7997	49.0685	44.8567	25.724	14.3567	16.7525
ENSG00000187098	MITF	protein_coding	8.7488e-06	1.52087	2.86963	28.3875	51.5587	57.446	47.6031	18.3743	19.1423	12.344
ENSG00000256389	RP11-606D9.1	lincRNA	4.93852e-07	1.65966	3.15942	26.9691	53.3677	52.6589	56.7575	13.7807	15.3139	18.516
ENSG00000162105	SHANK2	protein_coding	2.80774e-06	2.171	4.50337	25.9589	29.8498	47.8717	67.7428	7.34971	15.3139	6.17199
ENSG00000139132	FGD4	protein_coding	0.000535764	1.35633	2.56034	25.8445	34.3724	44.2813	68.6583	11.9433	17.2281	21.1611
ENSG00000282826	FRG1CP	unprocessed_pseudogene	0.0320302	0.683675	1.60623	25.7148	40.7042	25.1326	41.195	16.5368	21.0566	19.3977
ENSG00000116991	SIPA1L2	protein_coding	7.87713e-07	1.95046	3.86498	25.4091	35.277	32.3134	41.195	9.18713	6.69982	9.69884
ENSG00000121797	CCRL2	protein_coding	0.0464239	0.643847	1.56249	24.3496	34.3724	43.0845	51.2648	23.8865	21.0566	22.9245
ENSG00000091831	ESR1	protein_coding	0.00159791	1.03061	2.04289	24.0617	37.9906	44.2813	40.2795	16.5368	16.271	20.2794
ENSG00000280542	AP000432.4	lincRNA	6.70281e-05	1.46018	2.75143	23.9412	39.7997	39.4941	36.6177	10.1058	18.1852	9.69884
ENSG00000257523	CTD-2384A14.2	lincRNA	0.0270222	0.747219	1.67855	23.8948	40.7042	40.6909	31.1251	13.7807	17.2281	24.688
ENSG00000139174	PRICKLE1	protein_coding	0.00397364	1.11541	2.16657	23.4443	37.0861	39.4941	26.5479	11.9433	14.3567	14.1074
ENSG00000169429	CXCL8	protein_coding	0.002448	1.42035	2.6765	21.8259	22.6134	17.9519	18.3089	5.51228	5.7427	7.0537
ENSG00000150457	LATS2	protein_coding	0.0478473	0.710943	1.63687	21.8212	26.2316	35.9038	35.7023	19.293	12.4425	14.9891
ENSG00000226674	TEX41	lincRNA	7.87713e-07	1.81871	3.52765	21.6197	52.4632	45.4781	40.2795	10.1058	14.3567	11.4623
ENSG00000163520	FBLN2	protein_coding	1.57836e-05	1.69463	3.23695	21.5244	38.8951	37.1006	58.5884	12.862	7.65693	16.7525
ENSG00000163554	SPTA1	protein_coding	0.00531347	0.962178	1.94825	21.3054	37.9906	35.9038	37.5332	20.2117	17.2281	12.344
ENSG00000233355	CHRM3-AS2	antisense	0.00281943	1.22803	2.34247	21.016	28.0407	37.1006	41.195	18.3743	6.69982	13.2257
ENSG00000272822	RP11-302B13.5	protein_coding	0.0186389	0.842173	1.79275	20.9868	32.5634	28.723	29.2942	11.0246	17.2281	14.1074
ENSG00000152056	AP1S3	protein_coding	0.0129653	0.906939	1.87506	20.9638	39.7997	27.5262	36.6177	13.7807	18.1852	14.9891
ENSG00000154263	ABCA10	protein_coding	0.0135561	0.890814	1.85422	20.8809	30.7543	28.723	25.6324	9.18713	16.271	13.2257
ENSG00000168661	ZNF30	protein_coding	0.0133795	1.0097	2.01349	20.8785	33.4679	20.3455	38.4486	12.862	14.3567	10.5806
ENSG00000116005	PCYOX1	protein_coding	0.045651	0.678456	1.60043	20.6705	33.4679	21.5423	31.1251	14.6994	16.271	13.2257
ENSG00000221818	EBF2	protein_coding	1.70305e-05	1.73229	3.32255	20.1454	37.9906	32.3134	38.4486	10.1058	9.57117	9.69884
ENSG00000268486	ABC7-42418200C9.1	transcribed_unprocessed_pseudogene	0.00364134	1.08687	2.12413	19.6103	28.9452	33.5102	39.3641	14.6994	11.4854	14.9891
ENSG00000010278	CD9	protein_coding	1.55086e-11	3.18528	9.09629	19.5439	53.3677	43.0845	48.5185	5.51228	3.82847	5.29028
ENSG00000169398	PTK2	protein_coding	0.0138326	0.931955	1.90786	19.2573	23.518	32.3134	34.7869	11.0246	9.57117	18.516
ENSG00000265994	RP11-510D21.1	lincRNA	0.0220169	0.94288	1.92236	19.0854	25.3271	29.9198	29.2942	9.18713	10.5283	14.9891
ENSG00000198542	ITGBL1	protein_coding	0.00890913	1.32463	2.50469	17.582	22.6134	29.9198	30.2096	5.51228	9.57117	10.5806
ENSG00000174527	MYO1H	protein_coding	5.74132e-07	2.51191	5.70376	17.1028	28.0407	34.707	26.5479	2.75614	5.7427	5.29028
ENSG00000109501	WFS1	protein_coding	0.0194603	1.0146	2.02034	16.6431	24.4225	31.1166	22.8861	4.59357	13.3996	12.344
ENSG00000224326	RP5-933B4.1	lincRNA	0.0315493	0.862901	1.81869	16.0149	24.4225	31.1166	23.8015	5.51228	10.5283	17.6343
ENSG00000179709	NLRP8	protein_coding	0.0023668	1.66916	3.1803	15.9775	14.4726	21.5423	25.6324	4.59357	1.91423	8.81713
ENSG00000111490	TBC1D30	protein_coding	0.000353162	1.90408	3.7427	15.8698	17.1862	23.9358	24.717	7.34971	1.91423	5.29028
ENSG00000172967	XKR3	protein_coding	3.36769e-06	2.13746	4.39986	15.6076	29.8498	40.6909	30.2096	7.34971	5.7427	7.0537
ENSG00000198178	CLEC4C	protein_coding	0.00487416	1.23795	2.35863	15.2918	19.8998	23.9358	24.717	5.51228	11.4854	7.0537
ENSG00000104213	PDGFRL	protein_coding	7.35164e-07	2.64953	6.27461	15.2742	40.7042	38.2973	32.0405	5.51228	1.91423	7.93542
ENSG00000162946	DISC1	protein_coding	0.00162834	1.3965	2.63263	15.2142	19.8998	25.1326	34.7869	9.18713	8.61405	7.93542
ENSG00000165030	NFIL3	protein_coding	0.0247123	0.888555	1.85132	15.1715	30.7543	27.5262	22.8861	12.862	13.3996	8.81713
ENSG00000218336	TENM3	protein_coding	2.53924e-05	2.03406	4.09555	14.9995	29.8498	26.3294	25.6324	7.34971	4.78558	5.29028
ENSG00000174600	CMKLR1	protein_coding	0.0042764	1.26057	2.39591	14.9299	21.7089	29.9198	33.8714	8.26842	14.3567	7.0537
ENSG00000112299	VNN1	protein_coding	4.30623e-07	3.09233	8.52874	14.4519	34.3724	25.1326	30.2096	1.83743	0.957117	6.17199
ENSG00000188158	NHS	protein_coding	0.0247914	0.945232	1.9255	14.4034	18.0908	19.1487	23.8015	7.34971	11.4854	6.17199
ENSG00000242242	PVRL3-AS1	antisense	0.00204754	1.39705	2.63362	13.7302	23.518	23.9358	27.4633	6.43099	8.61405	8.81713
ENSG00000115616	SLC9A2	protein_coding	5.62691e-05	2.12249	4.35445	13.6394	27.1361	22.7391	24.717	8.26842	2.87135	3.52685
ENSG00000046653	GPM6B	protein_coding	0.000379194	2.16817	4.49453	13.6374	27.1361	28.723	20.1398	3.67485	1.91423	7.93542
ENSG00000226364	LINC02089	lincRNA	0.0249841	1.04983	2.07028	13.5106	19.8998	23.9358	17.3934	7.34971	7.65693	7.0537
ENSG00000011566	MAP4K3	protein_coding	0.00144582	1.68436	3.21398	12.4892	23.518	23.9358	21.0552	4.59357	4.78558	7.93542
ENSG00000185792	NLRP9	protein_coding	0.00478814	2.0998	4.28649	12.4291	13.5681	8.37754	10.0699	0	1.91423	3.52685
ENSG00000253524	RP11-89M20.2	lincRNA	0.000894623	2.03663	4.10285	11.6672	14.4726	28.723	23.8015	3.67485	6.69982	2.64514
ENSG00000115183	TANC1	protein_coding	2.39089e-05	2.37755	5.19655	11.6321	19.8998	33.5102	31.1251	2.75614	5.7427	5.29028
ENSG00000206532	RP11-553A10.1	lincRNA	0.00948386	1.26758	2.40757	11.4785	24.4225	21.5423	21.0552	11.0246	3.82847	7.0537
ENSG00000196549	MME	protein_coding	0.035748	1.03115	2.04366	11.4353	17.1862	17.9519	12.8162	2.75614	5.7427	7.93542
ENSG00000171885	AQP4	protein_coding	0.0464523	0.926935	1.90123	11.3784	17.1862	13.1647	17.3934	4.59357	5.7427	7.0537
ENSG00000147655	RSPO2	protein_coding	5.54203e-08	4.07496	16.8533	10.8491	33.4679	38.2973	37.5332	0.918713	0.957117	3.52685
ENSG00000180875	GREM2	protein_coding	0.00699238	1.66599	3.17331	10.4513	11.759	15.5583	15.5625	4.59357	1.91423	3.52685
ENSG00000168530	MYL1	protein_coding	0.00893743	1.55008	2.92833	9.81614	18.9953	16.7551	10.9853	5.51228	1.91423	4.40856
ENSG00000183305	MAGEA2B	protein_coding	0.0481402	1.13658	2.1986	9.60132	24.4225	9.57434	13.7317	0.918713	5.7427	5.29028
ENSG00000223633	RP11-143A22.1	lincRNA	0.0142919	1.34307	2.5369	9.40862	17.1862	14.3615	18.3089	2.75614	5.7427	6.17199
ENSG00000162687	KCNT2	protein_coding	0.0275825	1.19309	2.28641	9.20582	19.8998	21.5423	12.8162	7.34971	2.87135	6.17199
ENSG00000275214	IFI27	protein_coding	0.0272103	1.10754	2.15478	8.8292	17.1862	13.1647	23.8015	5.51228	7.65693	5.29028
ENSG00000264345	LINC01894	lincRNA	0.000175246	3.84953	14.4153	8.27644	22.6134	17.9519	13.7317	0.918713	0	1.76343
ENSG00000138378	STAT4	protein_coding	0.00133127	2.30442	4.93969	8.14154	21.7089	10.7711	20.1398	2.75614	0	5.29028
ENSG00000115604	IL18R1	protein_coding	0.0349092	1.15389	2.22513	7.81149	12.6635	15.5583	14.6471	4.59357	4.78558	3.52685
ENSG00000142405	NLRP12	protein_coding	0.00211928	1.99153	3.97659	7.42178	22.6134	15.5583	13.7317	3.67485	3.82847	2.64514
ENSG00000136237	RAPGEF5	protein_coding	0.0343739	1.09697	2.13906	7.24215	14.4726	13.1647	17.3934	3.67485	5.7427	5.29028
ENSG00000143355	LHX9	protein_coding	0.00142959	3.87643	14.6866	7.06466	13.5681	13.1647	14.6471	0	0.957117	0.881713
ENSG00000158301	GPRASP2	protein_coding	0.0470803	1.11435	2.16497	6.96281	12.6635	5.98396	12.8162	2.75614	2.87135	3.52685
ENSG00000237064	EIF3IP1	processed_pseudogene	0.0103194	2.56056	5.89937	6.73873	5.42723	23.9358	7.32355	2.75614	0	0.881713
ENSG00000233491	AC010091.1	transcribed_unitary_pseudogene	0.00074174	2.89283	7.42725	6.13042	14.4726	13.1647	18.3089	0.918713	1.91423	1.76343
ENSG00000106541	AGR2	protein_coding	0.00112895	4.37841	20.7985	6.04725	14.4726	15.5583	5.49266	0	0	0.881713
ENSG00000242290	ZBTB20-AS5	lincRNA	0.0403554	1.3048	2.47049	5.80325	8.14084	13.1647	9.15444	4.59357	0.957117	1.76343
ENSG00000103460	TOX3	protein_coding	0.0293435	1.51308	2.85418	5.54441	11.759	14.3615	8.23899	2.75614	2.87135	1.76343
ENSG00000259669	RP11-643A5.2	lincRNA	0.0302395	1.48781	2.80462	5.23237	8.14084	17.9519	11.9008	0.918713	1.91423	5.29028
ENSG00000136160	EDNRB	protein_coding	0.0232073	1.88923	3.70436	5.00187	9.04538	10.7711	9.15444	0.918713	3.82847	0
ENSG00000104413	ESRP1	protein_coding	0.0402368	1.37264	2.58943	4.80723	6.33177	14.3615	12.8162	3.67485	1.91423	1.76343
ENSG00000111331	OAS3	protein_coding	0.0147093	2.10474	4.30121	4.36405	9.04538	10.7711	11.9008	0.918713	2.87135	0.881713
ENSG00000163646	CLRN1	protein_coding	0.0376373	2.12377	4.35832	3.94784	11.759	1.19679	12.8162	0.918713	1.91423	0
ENSG00000106537	TSPAN13	protein_coding	0.0392675	1.67933	3.20279	3.79171	12.6635	4.78717	10.0699	0.918713	0.957117	2.64514

## Sheet: DOWN FC 1.5 Cys vs control
ensID	gene_name	gene_type	padj	log2FC	FC	mean count	Cys.1	Cys.2	Cys.3	LCL.1	LCL.2	LCL.3
ENSG00000185352	HS6ST3	protein_coding	1.49596e-30	-1.60576	0.328563	2142.48	774.284	984.96	931.006	2421.73	3044.59	2844.41
ENSG00000169116	PARM1	protein_coding	2.14507e-13	-0.850073	0.554757	1761.74	942.528	1159.69	1048.18	1852.13	2130.54	1791.64
ENSG00000253377	RP11-566H8.3	lincRNA	5.89874e-06	-0.785961	0.579966	1751.51	1004.94	1302.11	1394.22	2004.63	2628.24	2010.31
ENSG00000178860	MSC	protein_coding	4.8945e-15	-0.593767	0.66261	1615.31	1106.25	1065.14	1055.51	1706.05	1653.9	1557.11
ENSG00000137573	SULF1	protein_coding	4.74362e-23	-0.935356	0.522913	1561.33	855.693	962.221	984.102	1682.16	1927.63	1807.51
ENSG00000206120	EGFEM1P	transcribed_unitary_pseudogene	5.55891e-14	-1.33355	0.396791	1519.52	668.454	896.397	824.815	1830.08	2404.28	1957.4
ENSG00000148935	GAS2	protein_coding	4.4692e-22	-0.974106	0.509055	1405.18	882.829	1018.47	1006.07	1811.7	2089.39	1877.17
ENSG00000102879	CORO1A	protein_coding	2.63373e-18	-0.713312	0.609918	1363.01	1061.93	1018.47	1093.04	1874.18	1632.84	1751.08
ENSG00000156395	SORCS3	protein_coding	6.04327e-19	-1.54325	0.343112	1358.18	503.828	622.332	614.263	1424.01	2061.63	1710.52
ENSG00000171714	ANO5	protein_coding	1.21398e-27	-0.728692	0.603451	1334.13	1057.4	1056.77	1022.55	1717.99	1754.39	1767.83
ENSG00000182459	TEX19	protein_coding	6.47913e-17	-0.769248	0.586723	1329.62	1171.38	1035.23	1044.52	2003.71	1721.85	1885.98
ENSG00000188404	SELL	protein_coding	1.11562e-15	-0.593327	0.662813	1328.7	1234.69	1110.62	1111.35	1811.7	1651.03	1803.98
ENSG00000196586	MYO6	protein_coding	8.83654e-08	-0.736844	0.60005	1287.71	790.566	989.747	966.709	1398.28	1674.95	1626.76
ENSG00000105011	ASF1B	protein_coding	1.19718e-21	-0.623085	0.649281	1287.05	924.438	949.056	932.837	1503.02	1401.22	1446.01
ENSG00000112297	AIM1	protein_coding	1.46082e-32	-0.740058	0.598715	1280.23	930.77	961.024	912.697	1520.47	1570.63	1613.53
ENSG00000047648	ARHGAP6	protein_coding	1.3892e-14	-1.35055	0.392144	1229.15	460.41	661.826	603.277	1336.73	1760.14	1423.08
ENSG00000145864	GABRB2	protein_coding	1.1106e-15	-1.02944	0.489902	1208.74	587.045	765.947	737.848	1314.68	1544.79	1483.92
ENSG00000143507	DUSP10	protein_coding	9.59952e-13	-0.671448	0.627876	1199.59	795.993	895.201	871.502	1317.44	1450.03	1370.18
ENSG00000173482	PTPRM	protein_coding	4.08694e-09	-1.03588	0.487718	1172.99	524.632	810.228	749.748	1294.47	1706.54	1419.56
ENSG00000161888	SPC24	protein_coding	1.24489e-09	-0.752488	0.593579	1112.02	916.297	746.798	764.395	1401.96	1291.15	1488.33
ENSG00000134121	CHL1	protein_coding	1.27095e-13	-0.644023	0.639926	1078.52	790.566	776.718	753.41	1138.29	1278.71	1251.15
ENSG00000125255	SLC10A2	protein_coding	9.34026e-26	-0.829383	0.56277	987.214	743.53	696.533	717.708	1326.62	1221.28	1322.57
ENSG00000115290	GRB14	protein_coding	3.77223e-42	-0.946317	0.518956	980.723	672.976	673.794	672.851	1240.26	1305.51	1368.42
ENSG00000113448	PDE4D	protein_coding	3.30556e-24	-1.72066	0.303411	962.458	363.624	484.701	442.159	1279.77	1655.81	1401.92
ENSG00000129151	BBOX1	protein_coding	6.95472e-63	-1.40454	0.377738	955.005	514.682	483.504	522.718	1279.77	1321.78	1456.59
ENSG00000253666	KB-1615E4.2	antisense	1.87609e-35	-0.86761	0.548054	913.479	641.317	588.822	639.895	1114.4	1146.63	1180.61
ENSG00000127824	TUBA4A	protein_coding	1.92649e-13	-0.611637	0.654454	874.733	665.74	661.826	695.737	1136.45	1036.56	954.895
ENSG00000121989	ACVR2A	protein_coding	6.35058e-07	-0.592962	0.66298	822.405	512.873	641.481	589.546	820.411	944.674	920.508
ENSG00000271955	RP11-444A22.1	lincRNA	2.55846e-54	-2.44981	0.183035	803.225	217.089	263.294	264.563	1228.32	1527.56	1364.89
ENSG00000105339	DENND3	protein_coding	5.33571e-36	-1.04597	0.484318	799.051	500.209	531.376	571.237	1077.65	1129.4	1130.36
ENSG00000130592	LSP1	protein_coding	1.91566e-14	-0.724977	0.605007	796.894	531.868	519.408	501.663	943.519	814.506	842.036
ENSG00000048740	CELF2	protein_coding	2.74287e-24	-1.27563	0.413045	784.369	338.297	420.074	378.078	932.494	1028.9	826.165
ENSG00000064655	EYA2	protein_coding	2.45912e-06	-0.766332	0.58791	784.184	449.555	658.236	635.318	894.827	1205.01	972.529
ENSG00000104332	SFRP1	protein_coding	2.50447e-28	-0.809389	0.570624	740.426	546.341	534.966	535.535	962.812	932.232	949.605
ENSG00000231772	RP1-154K9.2	lincRNA	1.1281e-95	-7.79923	0.00448951	726.168	7.2363	5.98396	3.66177	1151.15	1442.37	1233.52
ENSG00000005302	MSL3	protein_coding	6.78067e-46	-1.20335	0.434266	676.628	397.997	363.825	351.53	885.64	843.22	856.143
ENSG00000048540	LMO3	protein_coding	1.65787e-06	-0.651972	0.63641	663.334	508.35	579.247	530.042	789.175	875.762	945.196
ENSG00000007944	MYLIP	protein_coding	1.1235e-14	-0.739341	0.599013	639.522	470.36	508.637	517.226	847.054	853.748	828.81
ENSG00000150893	FREM2	protein_coding	2.62523e-147	-6.39756	0.0118615	628.797	15.3771	10.7711	13.7317	1108.89	1169.6	1180.61
ENSG00000225760	LINC00431	transcribed_unprocessed_pseudogene	9.94566e-161	-6.27372	0.0129248	622.022	16.2817	13.1647	18.3089	1162.17	1353.36	1273.19
ENSG00000038427	VCAN	protein_coding	4.94646e-38	-1.38287	0.383454	550.044	250.557	299.198	285.618	685.36	783.878	726.531
ENSG00000025039	RRAGD	protein_coding	9.9062e-85	-1.79583	0.288006	543.617	231.562	244.146	245.339	835.111	834.606	843.799
ENSG00000058453	CROCC	protein_coding	3.6954e-10	-0.742315	0.597779	533.377	437.796	345.873	401.88	715.678	615.426	697.435
ENSG00000215146	RP11-313J2.1	transcribed_unprocessed_pseudogene	7.68163e-23	-0.982323	0.506164	529.126	385.333	349.463	393.641	716.596	765.693	779.434
ENSG00000082805	ERC1	protein_coding	5.79299e-05	-0.657742	0.633869	522.883	300.307	396.138	411.034	570.521	700.609	544.899
ENSG00000156515	HK1	protein_coding	1.602e-09	-0.607015	0.656554	516.919	429.656	416.484	391.81	652.287	580.013	682.446
ENSG00000100557	C14orf105	protein_coding	1.23313e-80	-2.19591	0.218255	514.333	152.867	175.928	192.243	754.264	903.518	747.693
ENSG00000186522	SEPT10	protein_coding	3.58092e-15	-0.813932	0.568829	501.175	305.734	354.25	347.869	604.513	612.555	577.522
ENSG00000169860	P2RY1	protein_coding	2.73756e-26	-1.02353	0.491912	499.095	338.297	336.299	333.222	650.449	662.325	757.391
ENSG00000150625	GPM6A	protein_coding	1.20919e-13	-0.817228	0.567531	496.412	306.638	307.576	324.067	525.504	594.369	561.651
ENSG00000135540	NHSL1	protein_coding	9.36432e-08	-0.667613	0.629548	479.448	352.77	422.468	419.273	628.4	695.824	615.436
ENSG00000143198	MGST3	protein_coding	8.97362e-18	-0.964292	0.51253	479.046	306.638	262.097	312.166	596.245	549.385	604.855
ENSG00000179456	ZBTB18	protein_coding	5.90413e-11	-0.683389	0.622701	474.934	343.724	318.347	284.703	478.65	537.9	529.028
ENSG00000143603	KCNN3	protein_coding	2.09535e-07	-0.964874	0.512323	466.851	197.189	317.15	295.688	501.618	628.826	511.393
ENSG00000113946	CLDN16	protein_coding	9.77656e-10	-0.790446	0.578166	462.481	354.579	366.218	326.813	553.984	678.596	618.962
ENSG00000181577	C6orf223	protein_coding	4.58013e-14	-0.841533	0.55805	456.823	392.569	331.511	411.034	712.922	647.011	714.187
ENSG00000150394	CDH8	protein_coding	9.0782e-80	-2.77704	0.145891	452.697	93.1674	138.828	115.346	721.19	860.448	805.004
ENSG00000214189	ZNF788	protein_coding	2.37089e-12	-0.671722	0.627757	450.294	353.674	356.644	321.321	576.033	517.8	569.587
ENSG00000276231	PIK3R6	protein_coding	2.59476e-13	-0.960075	0.51403	441.59	239.703	314.756	304.843	592.57	610.64	499.05
ENSG00000179088	C12orf42	protein_coding	2.05156e-05	-0.732659	0.601794	437.491	267.743	320.74	317.659	461.194	600.112	506.985
ENSG00000170927	PKHD1	protein_coding	4.95162e-08	-0.797577	0.575315	427.615	265.03	332.708	348.784	505.292	589.584	597.801
ENSG00000143067	ZNF697	protein_coding	7.14428e-12	-0.663845	0.631194	418.747	285.834	301.592	313.082	479.568	450.802	514.92
ENSG00000004864	SLC25A13	protein_coding	5.88637e-06	-0.591058	0.663856	412.726	341.011	343.479	366.177	497.943	574.27	553.716
ENSG00000166387	PPFIBP2	protein_coding	7.4695e-07	-0.605686	0.657159	398.45	281.311	318.347	316.744	456.601	537.9	432.039
ENSG00000188580	NKAIN2	protein_coding	2.96843e-19	-1.46749	0.361611	392.709	194.476	209.439	206.89	480.487	655.625	590.748
ENSG00000049192	ADAMTS6	protein_coding	5.52532e-05	-0.598691	0.660353	382.367	260.507	327.921	285.618	400.559	484.301	480.534
ENSG00000141968	VAV1	protein_coding	6.44966e-09	-0.682526	0.623074	378.843	312.066	294.411	319.49	483.243	491.001	544.017
ENSG00000151611	MMAA	protein_coding	2.75973e-16	-0.851369	0.554258	377.925	254.175	248.933	238.015	449.251	457.502	448.792
ENSG00000112773	FAM46A	protein_coding	2.05513e-30	-1.31801	0.401087	372.559	224.325	210.635	235.269	518.154	576.184	601.328
ENSG00000196562	SULF2	protein_coding	7.52245e-110	-2.7992	0.143667	370.617	108.545	87.3658	91.5444	697.303	686.253	650.704
ENSG00000170153	RNF150	protein_coding	6.57034e-06	-0.63873	0.642278	370.384	237.893	308.772	284.703	393.209	491.001	446.147
ENSG00000258616	RP11-369C8.1	lincRNA	2.54422e-16	-0.864057	0.549405	369.695	249.652	252.523	241.677	451.088	442.188	478.77
ENSG00000125910	S1PR4	protein_coding	2.0435e-12	-0.803114	0.573111	368.569	289.452	245.342	277.379	525.504	477.601	444.383
ENSG00000216863	LY86-AS1	antisense	4.28486e-23	-1.4176	0.374335	366.613	163.721	208.242	228.861	472.219	586.712	572.232
ENSG00000131979	GCH1	protein_coding	1.77511e-10	-0.698057	0.616402	366.356	306.638	238.162	286.534	474.056	436.445	469.071
ENSG00000102962	CCL22	protein_coding	1.585e-23	-1.60542	0.328639	364.353	165.53	205.848	221.537	651.368	696.781	489.351
ENSG00000173198	CYSLTR1	protein_coding	2.05758e-24	-1.23623	0.42448	364.07	190.857	177.125	204.144	413.421	462.287	495.523
ENSG00000186998	EMID1	protein_coding	1.45478e-09	-0.638642	0.642317	363.789	261.411	299.198	307.589	459.357	429.745	483.179
ENSG00000151575	TEX9	protein_coding	1.09394e-15	-0.862744	0.549906	355.457	211.662	223.8	235.269	382.185	417.303	437.33
ENSG00000204237	OXLD1	protein_coding	9.13557e-10	-0.611573	0.654483	351.743	299.402	295.608	264.563	440.982	448.888	442.62
ENSG00000154330	PGM5	protein_coding	1.34732e-10	-0.712524	0.610252	349.614	226.134	270.475	258.155	408.827	398.161	447.028
ENSG00000138835	RGS3	protein_coding	1.8971e-08	-0.621864	0.649831	338.918	271.361	258.507	281.041	457.519	414.431	402.061
ENSG00000156521	TYSND1	protein_coding	7.56561e-09	-0.674996	0.626334	336.369	236.989	239.358	261.817	440.982	380.932	381.782
ENSG00000147894	C9orf72	protein_coding	3.00076e-07	-0.685389	0.621838	335.193	276.789	265.688	232.523	378.51	424.003	475.243
ENSG00000185904	LINC00839	lincRNA	2.6076e-50	-1.66328	0.315721	332.952	170.053	140.025	146.471	507.13	472.816	486.706
ENSG00000242741	LINC02005	lincRNA	5.40648e-05	-0.627369	0.647356	324.004	254.175	247.736	287.449	364.729	491.958	409.997
ENSG00000113140	SPARC	protein_coding	1.30658e-42	-1.62018	0.325296	322.874	135.681	136.434	136.401	458.438	406.775	403.825
ENSG00000125848	FLRT3	protein_coding	5.15881e-64	-2.2256	0.213809	317.381	106.735	88.5626	117.177	456.601	499.615	532.555
ENSG00000118515	SGK1	protein_coding	1.06884e-34	-1.66975	0.314307	309.537	200.807	138.828	162.034	570.521	541.728	518.447
ENSG00000184226	PCDH9	protein_coding	9.60673e-12	-0.812415	0.569428	297.062	175.48	195.077	203.229	336.249	336.905	352.685
ENSG00000172456	FGGY	protein_coding	9.95501e-12	-1.35906	0.389836	292.256	133.872	199.864	169.357	392.291	510.143	429.394
ENSG00000138623	SEMA7A	protein_coding	9.24539e-08	-0.636558	0.643246	291.622	249.652	207.045	236.184	380.347	357.962	366.793
ENSG00000005844	ITGAL	protein_coding	1.94138e-10	-0.73923	0.599059	286.96	198.094	221.407	216.045	340.843	358.919	379.137
ENSG00000180828	BHLHE22	protein_coding	8.94861e-15	-0.883256	0.542142	284.138	214.375	217.816	218.791	419.852	382.847	418.814
ENSG00000196172	ZNF681	protein_coding	2.66142e-11	-0.805572	0.572135	283.274	202.616	215.423	224.284	364.729	369.447	409.997
ENSG00000101439	CST3	protein_coding	6.51877e-17	-0.981651	0.5064	281.488	180.003	173.535	187.666	405.153	340.734	342.105
ENSG00000169760	NLGN1	protein_coding	5.17209e-41	-2.23309	0.212702	279.46	94.9765	95.7434	95.2061	390.453	480.473	495.523
ENSG00000112799	LY86	protein_coding	3.02356e-06	-0.656985	0.634202	272.6	222.516	209.439	186.751	352.786	325.42	326.234
ENSG00000105122	RASAL3	protein_coding	2.17613e-16	-0.901503	0.535329	268.759	185.43	183.109	198.651	358.298	372.318	348.277
ENSG00000104774	MAN2B1	protein_coding	2.4384e-07	-0.61143	0.654548	265.076	211.662	195.077	188.581	320.631	304.363	305.073
ENSG00000228918	LINC01344	lincRNA	2.52876e-69	-5.28974	0.0255641	262.947	9.94992	10.7711	16.478	428.12	642.225	433.803
ENSG00000182054	IDH2	protein_coding	1.01772e-26	-1.59044	0.332069	256.092	131.158	102.924	104.361	348.192	320.634	372.083
ENSG00000090104	RGS1	protein_coding	1.29709e-20	-1.28177	0.411291	254.931	163.721	163.961	126.331	374.835	332.119	412.642
ENSG00000156269	NAA11	protein_coding	9.89507e-16	-1.28066	0.411608	247.391	119.399	149.599	148.302	324.306	395.289	316.535
ENSG00000179455	MKRN3	protein_coding	1.65674e-09	-0.711147	0.610834	246.288	201.712	181.912	194.99	316.037	321.591	330.642
ENSG00000157303	SUSD3	protein_coding	2.94591e-08	-0.673238	0.627097	243.975	185.43	219.013	178.512	316.037	306.277	321.825
ENSG00000099250	NRP1	protein_coding	8.97382e-24	-1.36846	0.387304	242.227	101.308	117.286	109.853	294.907	291.921	272.449
ENSG00000133985	TTC9	protein_coding	3.02791e-08	-0.687264	0.621031	241.199	180.003	190.29	205.975	304.094	346.476	298.901
ENSG00000100300	TSPO	protein_coding	6.96122e-05	-0.591615	0.6636	240.734	181.812	161.567	184.004	312.363	227.794	283.912
ENSG00000253839	RP11-431D12.1	lincRNA	3.90554e-08	-0.682896	0.622914	238.903	167.34	171.141	166.611	278.37	267.036	283.03
ENSG00000160888	IER2	protein_coding	5.9565e-12	-0.794363	0.576598	235.428	186.335	191.487	176.681	334.412	311.063	331.524
ENSG00000014257	ACPP	protein_coding	5.23142e-06	-0.645383	0.639323	234.957	180.908	185.503	204.144	277.451	278.521	364.147
ENSG00000005471	ABCB4	protein_coding	7.95523e-27	-1.82475	0.282289	232.466	100.404	110.105	75.0664	301.338	325.42	398.534
ENSG00000183032	SLC25A21	protein_coding	8.36598e-05	-0.59325	0.662848	232.034	151.058	162.764	162.949	247.134	240.236	256.578
ENSG00000156265	MAP3K7CL	protein_coding	1.13508e-17	-1.19108	0.437973	230.376	124.826	150.796	122.669	282.964	297.663	340.341
ENSG00000162643	WDR63	protein_coding	2.61875e-05	-0.727928	0.60377	226.507	139.299	180.716	177.596	253.565	323.505	280.385
ENSG00000101160	CTSZ	protein_coding	9.55495e-06	-0.618109	0.651524	226.463	170.958	156.78	167.526	294.907	233.536	255.697
ENSG00000154678	PDE1C	protein_coding	2.90345e-26	-1.85418	0.27659	225.325	49.7496	64.6268	52.1803	180.987	216.308	211.611
ENSG00000144749	LRIG1	protein_coding	2.4667e-24	-1.75988	0.295272	223.643	92.2629	106.514	107.107	302.257	397.203	356.212
ENSG00000140835	CHST4	protein_coding	7.76122e-09	-0.773517	0.58499	221.854	136.585	159.173	153.795	257.24	267.036	260.987
ENSG00000171914	TLN2	protein_coding	1.48833e-20	-1.45044	0.36591	221.681	92.2629	122.073	123.585	286.639	342.648	310.363
ENSG00000235823	OLMALINC	lincRNA	3.67199e-07	-0.671922	0.62767	220.157	165.53	179.519	219.706	297.663	299.577	327.115
ENSG00000176659	C20orf197	lincRNA	3.95807e-18	-1.10132	0.46609	217.05	130.253	148.402	136.401	289.395	306.277	308.6
ENSG00000167700	MFSD3	protein_coding	7.83665e-05	-0.622641	0.649481	209.599	174.576	184.306	139.147	291.232	223.008	278.621
ENSG00000132185	FCRLA	protein_coding	3.21539e-07	-0.672082	0.6276	207.935	153.771	149.599	149.217	244.378	224.922	269.804
ENSG00000011590	ZBTB32	protein_coding	5.95358e-08	-0.668657	0.629092	207.54	180.003	174.732	162.034	280.208	278.521	282.148
ENSG00000102935	ZNF423	protein_coding	2.77218e-64	-5.31969	0.0250389	205.541	8.14084	4.78717	13.7317	346.355	439.317	342.986
ENSG00000186469	GNG2	protein_coding	7.58611e-13	-1.0933	0.468687	205.434	119.399	132.844	134.57	248.971	305.32	290.965
ENSG00000168528	SERINC2	protein_coding	5.74261e-06	-0.609112	0.6556	204.184	137.49	137.631	129.993	205.792	221.094	208.084
ENSG00000232271	RP4-764O22.1	lincRNA	0.00448707	-0.604781	0.657571	204.078	121.208	168.748	139.147	220.491	266.078	210.729
ENSG00000150967	ABCB9	protein_coding	1.35683e-10	-0.878552	0.543913	200.315	132.967	136.434	136.401	265.508	241.193	256.578
ENSG00000196139	AKR1C3	protein_coding	2.24609e-59	-5.94541	0.0162276	198.128	2.71361	5.98396	9.15444	369.323	389.546	371.201
ENSG00000117791	MARC2	protein_coding	6.3745e-08	-0.725768	0.604675	192.242	130.253	144.812	133.655	225.085	220.137	246.88
ENSG00000089472	HEPH	protein_coding	1.6279e-07	-0.705224	0.613347	191.449	133.872	134.041	145.556	247.134	210.566	234.536
ENSG00000152104	PTPN14	protein_coding	4.4544e-60	-3.41253	0.0939129	190.726	23.518	33.5102	36.6177	303.175	399.118	306.836
ENSG00000107249	GLIS3	protein_coding	1.19871e-16	-1.5185	0.349049	190.253	65.1267	78.9883	86.9672	196.605	273.735	209.848
ENSG00000177182	CLVS1	protein_coding	6.8877e-09	-1.01771	0.493901	185.621	85.9311	125.663	123.585	201.198	263.207	234.536
ENSG00000253690	RP11-380I10.4	antisense	6.20853e-07	-0.688289	0.620589	185.487	148.344	126.86	132.739	209.467	219.18	249.525
ENSG00000213096	ZNF254	protein_coding	1.68889e-49	-2.33646	0.197995	184.432	62.4131	63.43	51.2648	283.882	334.034	285.675
ENSG00000229981	LINC01435	lincRNA	2.9205e-06	-1.02493	0.491433	177.657	95.881	119.679	102.53	170.881	280.435	229.245
ENSG00000231304	SGO1-AS1	processed_transcript	4.53854e-20	-1.61898	0.325566	177.223	68.7449	90.9562	95.2061	216.816	302.449	280.385
ENSG00000110693	SOX6	protein_coding	8.1661e-06	-1.00224	0.499224	175.011	65.1267	112.498	111.684	172.718	231.622	205.439
ENSG00000198954	KIF1BP	protein_coding	7.3265e-09	-0.950187	0.517565	174.536	108.545	101.727	114.43	237.947	191.423	219.547
ENSG00000283408	RP1-242N11.1	lincRNA	0.000170621	-0.662183	0.631921	174.532	78.6948	73.0043	83.3054	118.514	142.61	129.612
ENSG00000121898	CPXM2	protein_coding	1.24537e-52	-2.9099	0.133056	173.8	35.277	44.2813	37.5332	269.183	324.463	293.61
ENSG00000127863	TNFRSF19	protein_coding	1.87379e-66	-4.12231	0.0574195	173.479	15.3771	21.5423	16.478	289.395	314.891	327.997
ENSG00000235142	RP1-60O19.1	lincRNA	6.74562e-32	-7.31631	0.00627439	169.725	0.904538	2.39358	2.74633	319.712	322.548	367.674
ENSG00000136286	MYO1G	protein_coding	1.82077e-13	-1.08232	0.472267	166.443	110.354	123.27	97.9525	234.272	229.708	250.406
ENSG00000181274	FRAT2	protein_coding	5.39685e-05	-0.63583	0.643571	165.135	132.063	120.876	120.839	174.556	205.78	223.073
ENSG00000198286	CARD11	protein_coding	5.724e-16	-1.42982	0.371177	164.916	86.8356	84.9722	100.699	240.703	291.921	223.955
ENSG00000122641	INHBA	protein_coding	3.71433e-14	-1.08811	0.470376	163.368	94.0719	104.121	98.8679	215.898	223.008	205.439
ENSG00000248774	RP11-798M19.3	antisense	3.71513e-05	-0.594431	0.662306	162.92	131.158	137.631	120.839	192.011	204.823	208.966
ENSG00000243694	LINC02027	lincRNA	1.86835e-16	-1.49084	0.355805	161.987	71.4585	89.7594	97.037	228.76	267.036	249.525
ENSG00000129595	EPB41L4A	protein_coding	1.12677e-22	-1.89005	0.269797	157.462	51.5587	67.0204	64.9965	214.06	244.065	236.299
ENSG00000059377	TBXAS1	protein_coding	3.485e-13	-1.13403	0.455642	157.143	104.022	120.876	86.9672	213.142	247.893	236.299
ENSG00000133135	RNF128	protein_coding	1.49773e-15	-1.15561	0.448876	155.981	92.2629	92.153	92.4598	203.036	204.823	222.192
ENSG00000184371	CSF1	protein_coding	2.80804e-07	-0.831963	0.561764	154.975	92.2629	111.302	122.669	186.499	230.665	183.396
ENSG00000170379	TCAF2	protein_coding	4.86439e-19	-1.3753	0.385472	154.04	73.2676	81.3819	69.5737	202.117	189.509	199.267
ENSG00000170011	MYRIP	protein_coding	2.66908e-12	-1.67132	0.313967	150.747	59.6995	75.3979	82.3899	208.548	304.363	208.966
ENSG00000233005	AC067959.1	lincRNA	1.15385e-09	-1.21033	0.43217	150.712	83.2175	108.908	99.7834	207.629	282.349	209.848
ENSG00000133138	TBC1D8B	protein_coding	6.19145e-16	-1.32007	0.400516	150.385	76.8857	80.1851	101.614	229.678	188.552	245.116
ENSG00000169442	CD52	protein_coding	0.000299777	-0.673341	0.627053	148.404	116.685	99.3337	110.769	210.385	149.31	189.568
ENSG00000106688	SLC1A1	protein_coding	1.80941e-20	-1.74738	0.297843	147.575	49.7496	93.3498	63.1656	216.816	256.507	225.719
ENSG00000141198	TOM1L1	protein_coding	8.07337e-05	-0.626818	0.647603	147.243	108.545	117.286	110.769	167.206	198.123	173.697
ENSG00000167476	JSRP1	protein_coding	5.36862e-05	-0.656976	0.634206	145.461	111.258	99.3337	120.839	159.856	180.895	204.557
ENSG00000233154	LINC01762	lincRNA	0.00995617	-0.58982	0.664426	145.264	94.9765	129.254	130.908	192.93	250.765	136.666
ENSG00000149809	TM7SF2	protein_coding	6.7431e-06	-0.70043	0.615389	143.581	102.213	107.711	106.191	184.661	162.71	183.396
ENSG00000254006	RP11-1D12.2	lincRNA	4.48628e-36	-2.21192	0.215846	141.957	51.5587	45.4781	61.3347	237.028	235.451	280.385
ENSG00000221887	HMSD	protein_coding	6.41548e-09	-0.918102	0.529205	141.638	100.404	114.892	95.2061	187.418	212.48	201.912
ENSG00000162896	PIGR	protein_coding	1.01028e-16	-1.73722	0.299946	140.833	82.3129	55.0524	59.5038	242.54	182.809	256.578
ENSG00000099251	HSD17B7P2	transcribed_unprocessed_pseudogene	0.00171867	-0.595113	0.661993	140.305	94.0719	134.041	108.938	139.644	201.952	193.095
ENSG00000225179	LINC00457	lincRNA	3.27658e-34	-6.24187	0.0132133	139.043	4.52269	1.19679	2.74633	222.329	240.236	245.998
ENSG00000180096	SEPT1	protein_coding	1.78255e-08	-0.899863	0.535937	134.681	86.8356	101.727	90.6289	190.174	164.624	179.869
ENSG00000184564	SLITRK6	protein_coding	1.43946e-28	-1.99	0.251739	133.409	50.6541	59.8396	44.8567	212.223	192.38	219.547
ENSG00000263563	UBBP4	transcribed_unprocessed_pseudogene	7.87757e-06	-1.21973	0.429363	133.402	55.1768	55.0524	47.6031	147.913	113.897	132.257
ENSG00000126752	SSX1	protein_coding	2.08185e-16	-11.5211	0.000340265	131.842	0	0	0	240.703	241.193	246.88
ENSG00000148053	NTRK2	protein_coding	1.28534e-14	-1.27472	0.413305	130.324	72.363	80.1851	72.3201	175.474	203.866	177.224
ENSG00000064687	ABCA7	protein_coding	9.02793e-10	-1.0873	0.47064	129.024	67.8403	71.8075	98.8679	173.637	194.295	158.708
ENSG00000110848	CD69	protein_coding	2.34763e-05	-0.696386	0.617116	127.85	99.4992	93.3498	95.2061	170.881	147.396	167.525
ENSG00000168404	MLKL	protein_coding	1.37249e-05	-0.725388	0.604834	126.418	110.354	95.7434	94.2907	166.287	164.624	186.041
ENSG00000125810	CD93	protein_coding	4.4119e-58	-4.12967	0.0571277	125.524	10.8545	20.3455	13.7317	257.24	246.936	277.74
ENSG00000277734	TRAC	TR_C_gene	4.96593e-05	-0.874886	0.545297	125.468	124.826	74.2011	91.5444	203.954	167.495	196.622
ENSG00000232053	AC009784.3	lincRNA	2.6143e-06	-1.05514	0.481251	125.066	64.2222	93.3498	81.4745	142.401	176.109	202.794
ENSG00000143195	ILDR2	protein_coding	0.00189662	-0.6229	0.649364	122.824	75.9812	93.3498	90.6289	146.075	132.082	147.246
ENSG00000184867	ARMCX2	protein_coding	9.05948e-53	-4.29495	0.0509437	121.515	16.2817	8.37754	10.0699	226.004	222.051	265.396
ENSG00000182632	CCNYL2	transcribed_unprocessed_pseudogene	1.49881e-44	-5.36852	0.0242055	121.309	3.61815	3.59038	9.15444	243.459	240.236	235.417
ENSG00000108370	RGS9	protein_coding	3.45399e-15	-1.38343	0.383307	121.064	61.5086	61.0364	64.9965	146.994	176.109	180.751
ENSG00000267257	RP11-1151B14.4	antisense	1.21796e-07	-0.884599	0.541638	120.096	106.735	83.7754	81.4745	187.418	159.838	174.579
ENSG00000243176	RP11-550I24.2	processed_transcript	0.00219262	-0.609795	0.65529	119.702	75.9812	89.7594	100.699	128.62	167.495	135.784
ENSG00000072954	TMEM38A	protein_coding	5.41247e-05	-0.730097	0.602863	119.213	73.2676	75.3979	93.3753	136.888	139.739	144.601
ENSG00000185361	TNFAIP8L1	protein_coding	0.00071229	-0.600923	0.659332	118.888	90.4538	96.9402	86.0517	158.019	131.125	144.601
ENSG00000138722	MMRN1	protein_coding	0.000266622	-0.63553	0.643704	118.01	76.8857	80.1851	81.4745	127.701	129.211	130.494
ENSG00000095066	HOOK2	protein_coding	0.000105075	-0.621947	0.649793	117.368	90.4538	89.7594	88.798	146.075	135.911	148.128
ENSG00000007933	FMO3	protein_coding	1.23711e-23	-1.73976	0.299418	116.086	52.4632	51.4621	63.1656	175.474	190.466	205.439
ENSG00000144962	SPATA16	protein_coding	3.6464e-13	-1.12751	0.457704	116.039	83.2175	90.9562	81.4745	187.418	186.638	196.622
ENSG00000177606	JUN	protein_coding	4.43705e-06	-1.02736	0.490607	114.462	88.6447	63.43	60.4193	192.011	140.696	126.967
ENSG00000046889	PREX2	protein_coding	3.191e-08	-1.21503	0.430764	112.65	51.5587	46.6749	63.1656	120.351	151.224	123.44
ENSG00000118507	AKAP7	protein_coding	2.73053e-05	-0.79921	0.574664	112.462	64.2222	84.9722	94.2907	148.832	151.224	143.719
ENSG00000164841	TMEM74	protein_coding	2.30704e-12	-1.26607	0.415792	111.332	72.363	55.0524	56.7575	144.238	159.838	155.181
ENSG00000176697	BDNF	protein_coding	1.14151e-12	-1.26168	0.417059	110.734	66.0313	68.2172	66.8274	165.368	171.324	159.59
ENSG00000154079	SDHAF4	protein_coding	0.000231316	-0.672718	0.627324	110.266	84.122	71.8075	83.3054	126.782	118.682	156.063
ENSG00000158813	EDA	protein_coding	1.6035e-21	-1.96338	0.256426	110.239	36.1815	45.4781	43.9413	145.157	186.638	169.289
ENSG00000225329	LHFPL3-AS2	processed_transcript	2.8135e-15	-1.46259	0.36284	106.62	59.6995	55.0524	58.5884	168.125	160.796	163.999
ENSG00000236453	AC003092.1	lincRNA	4.19735e-26	-2.09649	0.233827	106.231	43.4178	39.4941	48.5185	175.474	223.008	180.751
ENSG00000233836	RP11-255H23.2	transcribed_unprocessed_pseudogene	6.72149e-35	-3.25121	0.105024	105.04	18.0908	20.3455	18.3089	165.368	164.624	222.192
ENSG00000213347	MXD3	protein_coding	0.00112899	-0.598982	0.66022	104.763	66.0313	84.9722	69.5737	123.108	114.854	111.096
ENSG00000009790	TRAF3IP3	protein_coding	0.00023893	-0.667755	0.629485	102.856	75.0766	71.8075	74.1509	114.839	121.554	132.257
ENSG00000118407	FILIP1	protein_coding	2.08273e-16	-1.90374	0.26725	101.011	35.277	45.4781	30.2096	117.595	155.053	152.536
ENSG00000053254	FOXN3	protein_coding	1.92466e-05	-0.915783	0.530056	100.925	50.6541	73.0043	72.3201	110.246	150.267	127.848
ENSG00000138771	SHROOM3	protein_coding	0.0038444	-0.626361	0.647809	100.512	49.7496	77.7915	60.4193	95.5462	119.64	93.4616
ENSG00000269220	LINC00528	lincRNA	0.000785968	-0.675269	0.626216	99.804	70.554	73.0043	64.0811	117.595	98.583	134.02
ENSG00000135074	ADAM19	protein_coding	5.72769e-17	-1.58517	0.333285	99.5484	40.7042	55.0524	52.1803	158.019	156.01	139.311
ENSG00000169220	RGS14	protein_coding	4.30814e-06	-0.950122	0.517589	98.7473	67.8403	69.4139	75.9818	166.287	133.039	134.02
ENSG00000114268	PFKFB4	protein_coding	0.000573901	-0.678364	0.624873	98.5818	76.8857	96.9402	98.8679	148.832	131.125	179.869
ENSG00000258760	CTD-2509G16.5	lincRNA	3.74919e-13	-1.59243	0.331612	97.9045	41.6087	41.8877	60.4193	119.433	172.281	161.353
ENSG00000246090	RP11-696N14.1	antisense	0.00103277	-0.698389	0.61626	96.3286	72.363	71.8075	48.5185	109.327	119.64	103.16
ENSG00000155792	DEPTOR	protein_coding	5.87554e-10	-1.16313	0.446542	95.3673	61.5086	55.0524	57.673	132.295	131.125	141.956
ENSG00000172264	MACROD2	protein_coding	2.90345e-26	-2.40205	0.189195	95.168	27.1361	25.1326	29.2942	141.482	159.838	144.601
ENSG00000263637	RP11-106E15.1	antisense	7.34863e-06	-0.817169	0.567554	94.3894	65.1267	61.0364	67.7428	113.92	113.897	129.612
ENSG00000223749	MIR503HG	lincRNA	0.000117096	-0.77049	0.586218	91.4937	69.6494	55.0524	50.3494	100.14	112.94	103.16
ENSG00000162627	SNX7	protein_coding	0.0018106	-0.639117	0.642106	91.3474	78.6948	56.2492	60.4193	112.083	89.0118	124.322
ENSG00000188177	ZC3H6	protein_coding	1.79157e-07	-1.14942	0.450807	91.322	50.6541	49.0685	68.6583	117.595	128.254	148.128
ENSG00000152926	ZNF117	protein_coding	0.00201296	-0.58783	0.665343	90.3183	74.1721	70.6107	68.6583	104.733	130.168	104.924
ENSG00000072201	LNX1	protein_coding	1.09412e-16	-1.80018	0.287139	87.4826	39.7997	47.8717	46.6876	143.319	178.981	159.59
ENSG00000113302	IL12B	protein_coding	0.000739544	-0.662169	0.631928	87.3219	56.9859	53.8556	60.4193	96.4649	99.5401	91.6981
ENSG00000106780	MEGF9	protein_coding	0.00165211	-0.650464	0.637075	87.0908	59.6995	58.6428	69.5737	91.8713	114.854	108.451
ENSG00000103187	COTL1	protein_coding	9.67236e-33	-3.26244	0.10421	87.0122	22.6134	14.3615	14.6471	153.425	186.638	176.343
ENSG00000226174	TEX22	protein_coding	0.00163389	-0.635751	0.643606	86.8317	75.0766	62.2332	54.0112	101.977	117.725	96.9884
ENSG00000128872	TMOD2	protein_coding	1.03683e-06	-0.954906	0.515875	85.1614	65.1267	52.6589	54.0112	102.896	121.554	125.203
ENSG00000245812	LINC02202	lincRNA	0.000263847	-0.692895	0.618611	84.873	64.2222	71.8075	67.7428	108.408	113.897	123.44
ENSG00000144824	PHLDB2	protein_coding	1.04942e-25	-2.4257	0.18612	84.5355	25.3271	23.9358	26.5479	124.945	156.967	140.192
ENSG00000125845	BMP2	protein_coding	0.000222734	-0.700489	0.615364	84.3517	71.4585	67.0204	56.7575	112.083	113.897	107.569
ENSG00000259674	RP11-356M20.1	processed_pseudogene	3.51343e-10	-1.35471	0.391013	82.9879	53.3677	39.4941	43.9413	119.433	104.326	142.837
ENSG00000054277	OPN3	protein_coding	5.50062e-07	-1.13049	0.456761	82.3121	46.1314	61.0364	54.0112	133.213	124.425	111.978
ENSG00000154721	JAM2	protein_coding	7.46358e-08	-1.17968	0.44145	82.2914	34.3724	50.2653	38.4486	84.5216	108.154	96.1067
ENSG00000177301	KCNA2	protein_coding	0.000674713	-0.857672	0.551842	81.9314	45.2269	38.2973	72.3201	90.9526	129.211	89.053
ENSG00000236591	RP11-162J8.3	antisense	0.000751565	-0.700231	0.615474	81.8592	61.5086	57.446	74.1509	95.5462	107.197	132.257
ENSG00000143494	VASH2	protein_coding	0.000125277	-0.791302	0.577822	81.4604	57.8904	62.2332	59.5038	108.408	118.682	101.397
ENSG00000225205	AC093818.1	antisense	2.24769e-05	-0.913298	0.53097	81.0313	60.604	55.0524	54.0112	118.514	116.768	103.16
ENSG00000225519	RP11-236B18.2	lincRNA	2.67848e-21	-2.1227	0.229617	78.5077	28.9452	22.7391	34.7869	142.401	118.682	131.375
ENSG00000167216	KATNAL2	protein_coding	6.45146e-11	-1.31425	0.402134	78.3349	47.9405	43.0845	43.9413	107.489	125.382	116.386
ENSG00000137491	SLCO2B1	protein_coding	1.52302e-14	-1.70746	0.306199	77.7308	35.277	46.6749	38.4486	140.563	147.396	116.386
ENSG00000275074	NUDT18	protein_coding	0.00506259	-0.609044	0.655631	77.2894	60.604	55.0524	55.8421	113.002	82.312	86.4079
ENSG00000085514	PILRA	protein_coding	0.00500503	-0.598036	0.660653	77.1546	51.5587	59.8396	62.2502	83.6029	94.7545	103.16
ENSG00000139597	N4BP2L1	protein_coding	0.00662301	-0.634498	0.644165	76.4967	46.1314	56.2492	66.8274	88.1965	96.6688	100.515
ENSG00000283052	RP11-210L7.3	lincRNA	0.0121215	-0.619915	0.650709	76.1993	55.1768	61.0364	54.9266	74.4158	117.725	96.9884
ENSG00000132704	FCRL2	protein_coding	1.71593e-05	-0.874415	0.545475	76.1429	56.0813	58.6428	56.7575	97.3836	112.94	119.913
ENSG00000247746	USP51	protein_coding	0.00488956	-0.599001	0.660211	75.7795	63.3177	49.0685	46.6876	87.2778	78.4836	93.4616
ENSG00000273079	GRIN2B	protein_coding	1.65684e-08	-1.21926	0.429502	75.6191	43.4178	41.8877	51.2648	97.3836	129.211	107.569
ENSG00000172349	IL16	protein_coding	8.1661e-06	-0.988216	0.504101	75.4965	50.6541	44.2813	53.0957	84.5216	126.339	101.397
ENSG00000179930	ZNF648	protein_coding	6.60019e-30	-4.88633	0.0338117	75.1628	2.71361	3.59038	7.32355	135.051	145.482	148.128
ENSG00000188649	CC2D2B	protein_coding	0.0224328	-0.594517	0.662266	74.2579	51.5587	68.2172	48.5185	71.6596	100.497	110.214
ENSG00000171234	UGT2B7	protein_coding	6.61218e-05	-0.890076	0.539586	73.9478	47.9405	52.6589	52.1803	78.0906	111.026	111.096
ENSG00000134955	SLC37A2	protein_coding	6.41999e-08	-1.26294	0.416694	73.6268	43.4178	33.5102	52.1803	102.896	92.8403	133.139
ENSG00000235335	AC016723.4	antisense	9.92321e-27	-3.0065	0.124438	72.9165	16.2817	16.7551	13.7317	135.97	142.61	109.332
ENSG00000108381	ASPA	protein_coding	1.12272e-06	-1.04548	0.484483	72.5716	47.036	35.9038	54.9266	96.4649	95.7117	110.214
ENSG00000257703	RP11-328J6.1	lincRNA	3.81185e-24	-3.18831	0.109704	72.466	9.04538	9.57434	16.478	90.0339	120.597	126.967
ENSG00000176771	NCKAP5	protein_coding	4.39764e-22	-2.73904	0.149785	70.9453	14.4726	20.3455	19.2243	113.002	135.911	122.558
ENSG00000147180	ZNF711	protein_coding	1.1191e-13	-1.75681	0.295902	69.927	36.1815	29.9198	27.4633	124.026	102.411	103.16
ENSG00000271860	RP11-436D23.1	lincRNA	5.45854e-12	-1.59937	0.330021	69.5112	34.3724	39.4941	37.5332	97.3836	118.682	134.02
ENSG00000263327	TAPT1-AS1	antisense	0.000559836	-0.74918	0.594942	69.3556	42.5133	47.8717	54.9266	79.9281	86.1405	94.3433
ENSG00000165915	SLC39A13	protein_coding	0.00449138	-0.609135	0.65559	68.9425	47.9405	47.8717	50.3494	77.1719	75.6122	86.4079
ENSG00000020577	SAMD4A	protein_coding	3.73113e-05	-1.12713	0.457825	68.7202	27.1361	62.2332	50.3494	92.7901	135.911	96.9884
ENSG00000102043	MTMR8	protein_coding	3.19841e-09	-1.41185	0.375829	68.0181	43.4178	33.5102	32.0405	102.896	96.6688	105.806
ENSG00000214174	AMZ2P1	transcribed_unprocessed_pseudogene	0.00263784	-0.760932	0.590115	68.0024	39.7997	33.5102	54.0112	76.2532	94.7545	67.0102
ENSG00000135740	SLC9A5	protein_coding	4.07695e-05	-0.874728	0.545357	67.6924	45.2269	39.4941	48.5185	84.5216	90.9261	84.6444
ENSG00000118292	C1orf54	protein_coding	0.0121215	-0.621544	0.649975	66.2218	62.4131	37.1006	43.9413	87.2778	81.3549	76.709
ENSG00000135828	RNASEL	protein_coding	0.000324861	-0.848239	0.555462	64.5556	53.3677	34.707	35.7023	76.2532	73.698	90.8164
ENSG00000154162	CDH12	protein_coding	1.89201e-15	-2.71113	0.15271	63.8743	4.52269	13.1647	10.9853	58.7977	70.8266	62.6016
ENSG00000226476	LINC01748	lincRNA	4.35814e-19	-5.80306	0.0179104	63.6557	1.80908	2.39358	1.83089	98.3023	146.439	117.268
ENSG00000123700	KCNJ2	protein_coding	5.8013e-11	-1.54204	0.3434	63.5166	41.6087	26.3294	32.0405	102.896	103.369	101.397
ENSG00000140015	KCNH5	protein_coding	7.09303e-23	-4.2485	0.0526105	62.8662	7.2363	3.59038	4.57722	96.4649	115.811	104.924
ENSG00000163689	C3orf67	protein_coding	3.17203e-08	-1.49386	0.35506	62.1988	28.0407	23.9358	45.7722	90.9526	111.983	92.5799
ENSG00000141622	RNF165	protein_coding	0.00261504	-0.835102	0.560543	61.8659	28.0407	50.2653	52.1803	85.4403	91.8832	78.4724
ENSG00000198142	SOWAHC	protein_coding	6.09772e-09	-1.72211	0.303104	61.4368	27.1361	27.5262	23.8015	115.758	66.9982	91.6981
ENSG00000176912	TYMSOS	processed_transcript	0.0169149	-0.642295	0.640693	60.9004	38.8951	43.0845	42.1104	75.3345	71.7837	69.6553
ENSG00000099785	MARCH2	protein_coding	0.010986	-0.631609	0.645456	60.5444	46.1314	35.9038	43.9413	64.3099	66.9982	84.6444
ENSG00000257989	RP1-288H2.2	lincRNA	3.95953e-05	-1.03082	0.48943	58.8676	24.4225	34.707	43.0259	72.5784	76.5693	74.0639
ENSG00000235652	RP11-545I5.3	antisense	0.00429468	-0.69374	0.618249	58.5929	45.2269	39.4941	42.1104	67.9848	81.3549	74.9456
ENSG00000233006	AC034220.3	processed_transcript	0.0072676	-0.644871	0.63955	58.522	40.7042	50.2653	45.7722	64.3099	85.1834	82.881
ENSG00000144476	ACKR3	protein_coding	7.02273e-09	-1.66633	0.315054	57.9344	36.1815	23.9358	20.1398	99.2211	77.5264	95.225
ENSG00000078401	EDN1	protein_coding	4.50483e-11	-1.749	0.297508	57.8129	29.8498	22.7391	21.0552	92.7901	77.5264	90.8164
ENSG00000148942	SLC5A12	protein_coding	3.16647e-24	-4.93573	0.0326737	57.8056	3.61815	5.98396	1.83089	100.14	124.425	130.494
ENSG00000156535	CD109	protein_coding	1.74866e-06	-1.13041	0.456786	57.3104	34.3724	39.4941	31.1251	82.6842	81.3549	77.5907
ENSG00000158715	SLC45A3	protein_coding	9.64522e-06	-1.04477	0.484723	57.3028	35.277	39.4941	38.4486	72.5784	96.6688	78.4724
ENSG00000251364	CTD-2516F10.2	antisense	0.00326341	-0.76882	0.586897	57.1067	22.6134	47.8717	41.195	66.1474	78.4836	61.7199
ENSG00000050438	SLC4A8	protein_coding	0.00015004	-0.974956	0.508755	56.7117	23.518	44.2813	33.8714	60.6351	71.7837	79.3542
ENSG00000276116	FUT8-AS1	antisense	0.000378436	-0.869715	0.547255	56.0399	37.9906	27.5262	34.7869	66.1474	64.1268	68.7736
ENSG00000122188	LAX1	protein_coding	6.32753e-08	-1.53449	0.345201	55.8096	25.3271	20.3455	26.5479	69.8222	62.2126	91.6981
ENSG00000171587	DSCAM	protein_coding	2.44593e-21	-3.76052	0.0737852	55.6174	8.14084	10.7711	4.57722	81.7655	142.61	102.279
ENSG00000264278	RP11-162A12.2	lincRNA	0.0052624	-0.663313	0.631427	55.6143	34.3724	47.8717	37.5332	71.6596	70.8266	61.7199
ENSG00000229618	AC011288.2	lincRNA	4.91443e-08	-1.41601	0.374747	55.568	42.5133	39.4941	27.4633	94.6275	101.454	111.978
ENSG00000267509	CTD-2043I16.1	lincRNA	5.57279e-18	-2.67065	0.157056	55.4532	10.8545	14.3615	15.5625	78.0906	91.8832	100.515
ENSG00000267327	CTD-2008L17.1	lincRNA	0.00229805	-0.832535	0.561542	54.0377	28.0407	34.707	34.7869	51.448	64.1268	74.9456
ENSG00000153233	PTPRR	protein_coding	5.73548e-05	-1.04157	0.485799	53.5459	33.4679	40.6909	44.8567	87.2778	81.3549	94.3433
ENSG00000224565	LINC01754	lincRNA	7.63123e-05	-0.98819	0.50411	52.998	42.5133	29.9198	46.6876	79.9281	76.5693	99.6336
ENSG00000197085	NPSR1-AS1	processed_transcript	0.000510961	-0.924296	0.526938	52.7288	33.4679	53.8556	39.3641	71.6596	105.283	81.9993
ENSG00000231671	LINC01307	lincRNA	0.00036241	-0.895376	0.537607	52.7265	37.0861	29.9198	40.2795	67.9848	67.9553	81.1176
ENSG00000165899	OTOGL	protein_coding	0.00145247	-0.982034	0.506266	52.6853	17.1862	17.9519	14.6471	33.9924	40.1989	35.2685
ENSG00000077616	NAALAD2	protein_coding	0.0181634	-0.58541	0.66646	50.9849	27.1361	37.1006	40.2795	54.2041	59.3412	59.0748
ENSG00000230107	CTA-126B4.7	lincRNA	0.0110672	-0.617785	0.651671	50.5969	35.277	47.8717	43.0259	62.4725	68.9124	79.3542
ENSG00000168959	GRM5	protein_coding	0.000149227	-0.997626	0.500823	50.1794	32.5634	35.9038	32.0405	65.2287	77.5264	73.1822
ENSG00000074370	ATP2A3	protein_coding	1.33373e-07	-1.35808	0.390102	50.163	28.9452	28.723	24.717	67.9848	77.5264	77.5907
ENSG00000223850	MYCNUT	lincRNA	1.11833e-21	-4.13503	0.0569155	50.0788	6.33177	3.59038	4.57722	96.4649	100.497	79.3542
ENSG00000280870	MIR325HG	lincRNA	2.17294e-20	-3.75748	0.073941	49.1653	7.2363	3.59038	7.32355	78.0906	101.454	88.1713
ENSG00000269386	RAB11B-AS1	antisense	0.0196495	-0.591236	0.663774	48.8591	44.3224	34.707	28.3788	54.2041	66.9982	59.0748
ENSG00000185697	MYBL1	protein_coding	0.00328526	-0.732198	0.601986	48.621	39.7997	29.9198	32.956	57.8789	66.041	63.4833
ENSG00000151322	NPAS3	protein_coding	2.51717e-16	-2.24868	0.210417	48.5015	18.0908	20.3455	20.1398	85.4403	91.8832	111.978
ENSG00000257522	RP11-562L8.1	processed_transcript	5.50062e-07	-1.36057	0.389428	47.1793	18.9953	22.7391	24.717	61.5538	54.5556	65.2468
ENSG00000196507	TCEAL3	protein_coding	0.000199335	-1.13601	0.455018	46.2094	28.9452	19.1487	26.5479	60.6351	53.5985	67.8919
ENSG00000155085	AK9	protein_coding	0.0134053	-0.712195	0.610391	46.1602	25.3271	20.3455	29.2942	39.5047	48.8129	52.0211
ENSG00000248605	CTD-2306M5.1	lincRNA	3.21715e-13	-2.72012	0.151761	46.0026	9.04538	8.37754	16.478	72.5784	81.3549	88.1713
ENSG00000139304	PTPRQ	protein_coding	0.00196513	-1.09017	0.469707	44.7912	10.8545	17.9519	10.0699	27.5614	36.3704	28.2148
ENSG00000111961	SASH1	protein_coding	1.21985e-07	-1.46486	0.36227	44.4696	18.0908	27.5262	25.6324	67.9848	66.041	73.1822
ENSG00000018408	WWTR1	protein_coding	0.00104105	-0.979098	0.507297	44.2307	24.4225	31.1166	28.3788	45.017	78.4836	59.0748
ENSG00000152785	BMP3	protein_coding	0.0360178	-0.616568	0.652221	44.0931	28.0407	17.9519	16.478	37.6673	42.1131	32.6234
ENSG00000135318	NT5E	protein_coding	1.75809e-19	-3.4188	0.093506	43.9848	5.42723	7.18075	10.0699	85.4403	76.5693	94.3433
ENSG00000272870	RP11-798M19.6	antisense	0.01122	-0.750697	0.594316	43.1901	32.5634	26.3294	32.0405	54.2041	47.8558	72.3005
ENSG00000176204	LRRTM4	protein_coding	5.25952e-08	-2.12215	0.229704	43.0065	11.759	8.37754	9.15444	37.6673	48.8129	53.7845
ENSG00000283930	RP11-508N22.2	protein_coding	1.07705e-07	-1.54553	0.342569	42.9061	22.6134	16.7551	23.8015	61.5538	67.9553	69.6553
ENSG00000237686	RP5-1120P11.1	antisense	5.54016e-05	-1.13933	0.453971	42.8309	29.8498	35.9038	27.4633	76.2532	84.2263	60.8382
ENSG00000266983	CTC-232P5.1	antisense	0.000869426	-1.00965	0.496667	42.2075	26.2316	22.7391	18.3089	56.9602	54.5556	38.7954
ENSG00000273117	AC144652.1	lincRNA	0.011699	-0.709673	0.611459	41.5633	29.8498	29.9198	31.1251	56.0415	43.0702	67.8919
ENSG00000161929	SCIMP	protein_coding	0.0110243	-0.776109	0.58394	41.2757	34.3724	22.7391	38.4486	80.8468	51.6843	56.4296
ENSG00000234753	FOXP4-AS1	antisense	0.0277223	-0.662976	0.631574	40.7373	18.9953	37.1006	29.2942	50.5292	53.5985	51.1393
ENSG00000265688	MAFG-AS1	antisense	0.011709	-0.688811	0.620365	40.1766	34.3724	32.3134	24.717	56.0415	57.427	51.1393
ENSG00000189184	PCDH18	protein_coding	0.000709539	-0.945394	0.519288	40.0852	22.6134	32.3134	21.0552	54.2041	49.7701	53.7845
ENSG00000168685	IL7R	protein_coding	1.92802e-11	-2.004	0.249309	39.9676	19.8998	15.5583	12.8162	70.7409	64.1268	70.537
ENSG00000157388	CACNA1D	protein_coding	0.0198117	-0.652855	0.63602	39.9002	39.7997	28.723	32.0405	45.9357	75.6122	59.0748
ENSG00000066056	TIE1	protein_coding	1.1131e-17	-4.15747	0.0560372	39.416	2.71361	5.98396	3.66177	84.5216	66.9982	76.709
ENSG00000260725	AC005307.1	lincRNA	3.45979e-05	-1.25265	0.419676	39.2214	17.1862	29.9198	27.4633	57.8789	74.6551	59.0748
ENSG00000154175	ABI3BP	protein_coding	2.75061e-11	-2.10529	0.232405	38.9912	16.2817	11.9679	15.5625	65.2287	66.041	71.4187
ENSG00000163661	PTX3	protein_coding	0.0219125	-0.670525	0.628278	38.9688	32.5634	20.3455	27.4633	43.1795	44.0274	60.8382
ENSG00000196878	LAMB3	protein_coding	0.00271339	-0.796306	0.575822	38.8559	35.277	34.707	26.5479	58.7977	59.3412	65.2468
ENSG00000231689	LINC01090	lincRNA	0.000168371	-1.18856	0.438741	38.4005	20.8044	13.1647	28.3788	53.2854	48.8129	57.3113
ENSG00000258602	LINC01629	lincRNA	6.885e-06	-1.46363	0.36258	38.0085	23.518	13.1647	19.2243	71.6596	47.8558	51.1393
ENSG00000253250	C8orf88	protein_coding	1.17768e-12	-2.52615	0.173602	37.5706	10.8545	13.1647	8.23899	53.2854	65.0839	76.709
ENSG00000133640	LRRIQ1	protein_coding	1.10104e-06	-1.7677	0.293677	37.3446	20.8044	8.37754	23.8015	52.3667	66.041	83.7627
ENSG00000228109	MELTF-AS1	antisense	0.0102803	-0.758105	0.591272	37.0396	28.0407	19.1487	21.9706	48.6918	35.4133	49.3759
ENSG00000124491	F13A1	protein_coding	3.14087e-15	-3.27887	0.103029	36.8854	4.52269	7.18075	6.40811	57.8789	66.041	61.7199
ENSG00000215267	AKR1C7P	transcribed_unprocessed_pseudogene	8.50045e-05	-1.12924	0.457157	36.8453	22.6134	26.3294	21.9706	54.2041	47.8558	65.2468
ENSG00000164088	PPM1M	protein_coding	0.0295644	-0.596105	0.661537	36.7944	34.3724	26.3294	24.717	49.6105	56.4699	41.4405
ENSG00000267317	CTB-25B13.12	antisense	0.010986	-0.843601	0.557251	35.7951	16.2817	13.1647	29.2942	40.4234	29.6706	53.7845
ENSG00000163637	PRICKLE2	protein_coding	1.4417e-05	-1.35348	0.391347	35.6971	15.3771	17.9519	17.3934	43.1795	47.8558	49.3759
ENSG00000187134	AKR1C1	protein_coding	8.00905e-07	-1.88668	0.270428	35.336	15.3771	4.78717	8.23899	38.586	38.2847	42.3222
ENSG00000127329	PTPRB	protein_coding	0.000441405	-1.11727	0.460967	34.3072	17.1862	19.1487	32.0405	55.1228	47.8558	62.6016
ENSG00000230131	RP11-282I1.1	lincRNA	0.000535764	-1.2382	0.4239	33.9538	11.759	9.57434	28.3788	43.1795	47.8558	44.0856
ENSG00000125735	TNFSF14	protein_coding	4.38539e-09	-2.09233	0.234502	33.7751	16.2817	5.98396	14.6471	56.9602	64.1268	53.7845
ENSG00000267731	RP11-147L13.8	lincRNA	1.26537e-05	-1.4514	0.365667	32.6143	13.5681	20.3455	15.5625	43.1795	51.6843	51.1393
ENSG00000226372	DCAF8L1	protein_coding	9.10146e-10	-2.49704	0.17714	32.2477	8.14084	7.18075	6.40811	48.6918	44.9845	39.6771
ENSG00000224810	RP11-538D16.2	lincRNA	2.00748e-11	-4.8944	0.0336232	32.2351	3.61815	0	0.915444	52.3667	70.8266	44.0856
ENSG00000257048	RP11-476M19.2	lincRNA	6.82863e-13	-3.07333	0.118806	32.0323	4.52269	4.78717	9.15444	53.2854	61.2555	55.5479
ENSG00000156966	B3GNT7	protein_coding	0.0424653	-0.611857	0.654354	31.9562	17.1862	27.5262	24.717	45.017	39.2418	39.6771
ENSG00000130830	MPP1	protein_coding	0.000972459	-1.02854	0.490206	31.9271	19.8998	20.3455	24.717	36.7485	57.427	53.7845
ENSG00000147724	FAM135B	protein_coding	3.95802e-06	-1.84787	0.277801	31.8915	7.2363	9.57434	10.9853	38.586	29.6706	42.3222
ENSG00000132554	RGS22	protein_coding	0.00304543	-0.979636	0.507108	31.4522	18.0908	21.5423	19.2243	41.3421	43.0702	46.7308
ENSG00000206557	TRIM71	protein_coding	1.80128e-05	-1.41526	0.374943	31.433	18.0908	17.9519	14.6471	50.5292	44.0274	52.9028
ENSG00000105928	DFNA5	protein_coding	1.89462e-11	-2.93933	0.130369	31.0304	7.2363	9.57434	4.57722	56.0415	43.0702	74.9456
ENSG00000253541	SEPT10P1	processed_pseudogene	0.0464823	-0.61722	0.651926	30.9487	18.0908	20.3455	22.8861	32.155	28.7135	51.1393
ENSG00000173801	JUP	protein_coding	8.47799e-05	-1.28759	0.409635	30.5998	15.3771	17.9519	21.0552	50.5292	56.4699	39.6771
ENSG00000166268	MYRFL	protein_coding	0.0197385	-0.728428	0.603561	30.3058	18.9953	19.1487	17.3934	33.9924	39.2418	33.5051
ENSG00000124215	CDH26	protein_coding	4.39587e-05	-1.34314	0.394162	30.034	17.1862	17.9519	18.3089	44.0982	56.4699	48.4942
ENSG00000187912	CLEC17A	protein_coding	3.36775e-05	-1.35695	0.390408	29.9992	19.8998	14.3615	17.3934	49.6105	40.1989	56.4296
ENSG00000169862	CTNND2	protein_coding	0.000324519	-1.14957	0.450759	29.7507	18.9953	19.1487	22.8861	39.5047	52.6414	58.1931
ENSG00000151789	ZNF385D	protein_coding	0.0204851	-0.807007	0.571566	29.621	9.04538	14.3615	19.2243	27.5614	29.6706	31.7417
ENSG00000259048	CTD-2058B24.2	antisense	8.90748e-10	-2.7464	0.149022	29.3467	4.52269	9.57434	7.32355	39.5047	66.9982	47.6125
ENSG00000224137	LINC01857	lincRNA	0.0189359	-0.822972	0.565276	29.175	18.0908	11.9679	28.3788	38.586	38.2847	48.4942
ENSG00000150556	LYPD6B	protein_coding	3.54355e-08	-2.16389	0.223154	29.0703	9.94992	10.7711	13.7317	57.8789	57.427	53.7845
ENSG00000218357	LINC01644	lincRNA	8.4835e-10	-5.58667	0.0208087	28.1691	1.80908	1.19679	0	49.6105	57.427	62.6016
ENSG00000154358	OBSCN	protein_coding	2.63263e-09	-2.29917	0.203179	28.0931	5.42723	14.3615	11.9008	59.7164	49.7701	55.5479
ENSG00000260448	LCMT1-AS1	lincRNA	0.0128519	-0.787686	0.579272	28.093	17.1862	29.9198	15.5625	37.6673	42.1131	42.3222
ENSG00000225489	RP11-390F4.3	lincRNA	0.0272682	-0.768346	0.58709	27.7923	19.8998	13.1647	25.6324	41.3421	32.542	48.4942
ENSG00000172987	HPSE2	protein_coding	2.76417e-10	-2.53649	0.172362	27.6985	8.14084	7.18075	11.9008	50.5292	69.8695	52.9028
ENSG00000246084	CTD-2506J14.1	lincRNA	0.00097434	-1.26223	0.4169	27.3821	12.6635	14.3615	10.9853	23.8865	41.156	38.7954
ENSG00000066923	STAG3	protein_coding	9.03018e-07	-2.13689	0.22737	27.125	6.33177	10.7711	11.9008	51.448	26.7993	62.6016
ENSG00000177627	C12orf54	protein_coding	0.00197209	-1.08792	0.470438	27.0151	18.0908	16.7551	16.478	40.4234	38.2847	45.8491
ENSG00000137673	MMP7	protein_coding	0.0481277	-0.594169	0.662426	26.6491	17.1862	23.9358	27.4633	41.3421	43.0702	37.9137
ENSG00000197134	ZNF257	protein_coding	6.0788e-07	-1.9328	0.26192	26.6489	9.04538	15.5583	6.40811	36.7485	49.7701	39.6771
ENSG00000172006	ZNF554	protein_coding	0.035255	-0.715735	0.608895	26.32	24.4225	9.57434	16.478	30.3175	35.4133	37.0319
ENSG00000171992	SYNPO	protein_coding	4.76247e-05	-1.54645	0.34235	26.0735	11.759	10.7711	13.7317	40.4234	35.4133	43.2039
ENSG00000282840	GS1-590J6.3	lincRNA	7.8262e-05	-1.61097	0.327379	25.2621	11.759	7.18075	15.5625	39.5047	32.542	49.3759
ENSG00000224122	POU6F2-AS1	antisense	0.0371073	-0.689303	0.620154	25.1657	20.8044	13.1647	14.6471	35.8298	31.5848	28.2148
ENSG00000242268	LINC02082	lincRNA	1.64891e-07	-3.22241	0.107142	23.6718	0.904538	7.18075	3.66177	31.2363	53.5985	35.2685
ENSG00000138735	PDE5A	protein_coding	5.93608e-06	-2.30004	0.203058	23.2341	5.42723	5.98396	6.40811	33.9924	25.8421	40.5588
ENSG00000155158	TTC39B	protein_coding	0.0194391	-0.90968	0.532303	23.1208	8.14084	15.5583	12.8162	30.3175	19.1423	33.5051
ENSG00000126970	ZC4H2	protein_coding	1.04866e-10	-3.2608	0.104328	22.6987	2.71361	8.37754	2.74633	41.3421	44.0274	52.0211
ENSG00000249948	GBA3	polymorphic_pseudogene	5.73219e-07	-2.05504	0.240642	22.4455	5.42723	11.9679	9.15444	36.7485	36.3704	45.8491
ENSG00000115594	IL1R1	protein_coding	0.0107756	-0.886513	0.54092	22.2012	14.4726	15.5583	13.7317	29.3988	29.6706	35.2685
ENSG00000247498	RP11-392P7.6	antisense	4.74428e-08	-5.12806	0.0285957	22.1014	0.904538	1.19679	0.915444	38.586	45.9416	42.3222
ENSG00000197934	CYYR1-AS1	antisense	2.54813e-09	-4.87362	0.0341109	21.943	0.904538	3.59038	0	36.7485	51.6843	49.3759
ENSG00000107738	VSIR	protein_coding	0.000199237	-1.52097	0.348451	21.9011	7.2363	10.7711	10.0699	33.0737	30.6277	27.3331
ENSG00000168280	KIF5C	protein_coding	0.00839683	-1.84387	0.278573	21.8802	3.61815	2.39358	20.1398	47.7731	67.9553	22.0428
ENSG00000226025	LGALS17A	transcribed_unprocessed_pseudogene	0.000242206	-1.60377	0.329017	21.6292	14.4726	4.78717	7.32355	33.0737	33.4991	29.0965
ENSG00000189229	AC069277.2	lincRNA	0.00544552	-0.992133	0.502734	21.5527	11.759	19.1487	14.6471	33.0737	37.3275	33.5051
ENSG00000183496	MEX3B	protein_coding	0.013181	-0.917941	0.529264	21.5399	10.8545	16.7551	10.0699	28.4801	26.7993	28.2148
ENSG00000106536	POU6F2	protein_coding	0.00240212	-1.23957	0.423499	21.2359	8.14084	10.7711	10.0699	20.2117	25.8421	33.5051
ENSG00000173988	LRRC63	protein_coding	0.0368208	-0.789485	0.578551	21.1705	10.8545	11.9679	19.2243	25.724	36.3704	30.86
ENSG00000250742	RP11-834C11.4	lincRNA	0.0290039	-0.799179	0.574676	21.06	10.8545	10.7711	17.3934	26.6427	25.8421	31.7417
ENSG00000112394	SLC16A10	protein_coding	1.52508e-05	-1.93304	0.261877	20.952	11.759	2.39358	10.9853	32.155	45.9416	35.2685
ENSG00000176244	ACBD7	protein_coding	0.0366426	-0.815097	0.56837	20.0295	9.04538	13.1647	12.8162	31.2363	19.1423	28.2148
ENSG00000152463	OLAH	protein_coding	1.03534e-06	-2.13985	0.226903	19.667	6.33177	7.18075	10.0699	33.9924	39.2418	43.2039
ENSG00000249624	AP000295.9	protein_coding	0.0442875	-0.78748	0.579355	19.4111	11.759	13.1647	8.23899	19.293	36.3704	19.3977
ENSG00000238169	LINC01053	antisense	4.78901e-08	-3.21388	0.107777	19.3746	3.61815	0	5.49266	37.6673	27.7564	37.9137
ENSG00000267179	CTD-2006C1.13	protein_coding	0.038041	-0.800863	0.574006	19.3545	8.14084	8.37754	12.8162	18.3743	18.1852	29.0965
ENSG00000138829	FBN2	protein_coding	4.29318e-07	-3.559	0.0848464	19.3146	3.61815	1.19679	0.915444	27.5614	20.0994	34.3868
ENSG00000127324	TSPAN8	protein_coding	0.00145247	-1.47735	0.359147	19.0712	7.2363	4.78717	12.8162	25.724	26.7993	31.7417
ENSG00000224376	AC017104.6	processed_transcript	0.00535136	-1.34221	0.394416	18.7721	9.94992	4.78717	12.8162	38.586	17.2281	32.6234
ENSG00000187398	LUZP2	protein_coding	0.000423006	-1.62916	0.323277	18.4164	7.2363	7.18075	8.23899	28.4801	20.0994	33.5051
ENSG00000185737	NRG3	protein_coding	0.00510404	-1.26834	0.415139	18.404	8.14084	8.37754	10.9853	20.2117	21.0566	39.6771
ENSG00000231460	RP11-321L2.1	lincRNA	0.0463086	-0.781407	0.581799	18.2059	9.94992	9.57434	9.15444	18.3743	20.0994	26.4514
ENSG00000173253	DMRT2	protein_coding	1.43821e-07	-3.98229	0.0632719	18.146	0.904538	2.39358	1.83089	29.3988	36.3704	27.3331
ENSG00000162897	FCAMR	protein_coding	0.0294614	-0.888577	0.540147	17.5878	13.5681	7.18075	6.40811	22.9678	20.0994	22.0428
ENSG00000267284	RP11-397A16.1	lincRNA	1.33045e-05	-2.33535	0.198149	17.51	5.42723	4.78717	4.57722	26.6427	40.1989	20.2794
ENSG00000165966	PDZRN4	protein_coding	0.0136748	-1.13636	0.454905	17.3794	9.94992	7.18075	7.32355	14.6994	26.7993	27.3331
ENSG00000129355	CDKN2D	protein_coding	0.00981783	-1.13582	0.455076	17.2804	9.04538	11.9679	6.40811	22.0491	22.9708	28.2148
ENSG00000204740	MALRD1	protein_coding	0.0267731	-0.841553	0.558042	17.1633	12.6635	13.1647	10.9853	22.9678	28.7135	29.9782
ENSG00000128284	APOL3	protein_coding	0.0321582	-0.828885	0.562964	16.9181	16.2817	8.37754	10.0699	23.8865	32.542	22.9245
ENSG00000254343	RP11-760H22.2	lincRNA	0.00397878	-1.21043	0.432141	16.8014	9.04538	8.37754	10.0699	29.3988	23.9279	22.9245
ENSG00000226733	RP11-397G17.1	protein_coding	4.16479e-05	-2.1954	0.218333	16.7937	6.33177	3.59038	5.49266	16.5368	30.6277	37.0319
ENSG00000137501	SYTL2	protein_coding	0.00334374	-1.38181	0.383736	16.7692	8.14084	9.57434	7.32355	28.4801	23.9279	26.4514
ENSG00000198816	ZNF358	protein_coding	0.000854339	-1.48248	0.357872	16.7607	8.14084	7.18075	7.32355	27.5614	23.9279	22.9245
ENSG00000122224	LY9	protein_coding	0.0280219	-0.864381	0.549282	16.3431	12.6635	9.57434	10.0699	28.4801	27.7564	18.516
ENSG00000259639	RP11-184D12.1	lincRNA	5.06825e-06	-2.43389	0.185066	16.1317	4.52269	4.78717	4.57722	24.8053	30.6277	30.86
ENSG00000178338	ZNF354B	protein_coding	2.00761e-05	-2.22951	0.213232	16.0615	4.52269	7.18075	3.66177	28.4801	20.0994	32.6234
ENSG00000179934	CCR8	protein_coding	3.27784e-06	-2.83672	0.139979	15.9849	2.71361	9.57434	0.915444	39.5047	40.1989	23.8062
ENSG00000073008	PVR	protein_coding	5.06509e-06	-5.18647	0.027461	15.9553	0	1.19679	0.915444	25.724	32.542	37.0319
ENSG00000188089	PLA2G4E	protein_coding	0.00437098	-1.35588	0.390697	15.9402	9.04538	8.37754	7.32355	15.6181	27.7564	34.3868
ENSG00000092051	JPH4	protein_coding	0.00193581	-1.3892	0.381777	15.778	7.2363	10.7711	7.32355	22.9678	23.9279	30.86
ENSG00000167748	KLK1	protein_coding	0.0133588	-1.08029	0.472934	15.5969	9.04538	5.98396	11.9008	30.3175	19.1423	22.9245
ENSG00000109686	SH3D19	protein_coding	0.00606596	-1.25098	0.420163	15.1142	9.94992	9.57434	7.32355	27.5614	30.6277	20.2794
ENSG00000154415	PPP1R3A	protein_coding	0.00176782	-1.61247	0.327039	14.7042	5.42723	9.57434	4.57722	20.2117	21.0566	29.9782
ENSG00000197632	SERPINB2	protein_coding	0.000380888	-2.02932	0.244971	14.4404	6.33177	2.39358	3.66177	22.9678	15.3139	24.688
ENSG00000176024	ZNF613	protein_coding	3.21502e-05	-4.84675	0.0347522	14.1422	0.904538	0	0.915444	29.3988	22.9708	24.688
ENSG00000077063	CTTNBP2	protein_coding	0.0338638	-1.00183	0.499367	13.6739	10.8545	4.78717	3.66177	17.4556	17.2281	19.3977
ENSG00000174175	SELP	protein_coding	4.28922e-05	-2.41117	0.188004	13.6095	6.33177	3.59038	3.66177	21.1304	35.4133	30.86
ENSG00000259291	RP11-617F23.1	antisense	0.048461	-0.881972	0.542625	13.2283	9.94992	3.59038	4.57722	19.293	15.3139	14.1074
ENSG00000183813	CCR4	protein_coding	2.74574e-06	-4.62789	0.0404452	13.1024	2.71361	0	0	34.9111	31.5848	26.4514
ENSG00000232451	AC016768.1	lincRNA	3.28104e-07	-3.15505	0.112263	13.0832	2.71361	3.59038	2.74633	29.3988	30.6277	31.7417
ENSG00000135298	ADGRB3	protein_coding	0.000845428	-1.87369	0.272875	12.917	5.42723	5.98396	2.74633	26.6427	22.0137	14.1074
ENSG00000231662	RP11-686D16.1	lincRNA	0.00261504	-1.8001	0.287155	12.7782	1.80908	2.39358	10.0699	16.5368	24.885	23.8062
ENSG00000153993	SEMA3D	protein_coding	4.69862e-05	-2.29887	0.203222	12.6873	4.52269	4.78717	4.57722	29.3988	22.0137	29.0965
ENSG00000228168	HNRNPA1P21	processed_pseudogene	2.72704e-05	-2.51594	0.174834	12.6299	4.52269	2.39358	4.57722	35.8298	25.8421	18.516
ENSG00000134323	MYCN	protein_coding	1.20675e-05	-5.65001	0.0199149	12.5827	0	1.19679	0	22.9678	23.9279	30.86
ENSG00000163207	IVL	protein_coding	6.05766e-05	-4.59989	0.0412376	12.2967	0.904538	0	0.915444	18.3743	24.885	22.0428
ENSG00000171658	NMRAL2P	transcribed_unprocessed_pseudogene	0.00184842	-1.87277	0.273049	12.2545	2.71361	4.78717	3.66177	21.1304	19.1423	10.5806
ENSG00000250673	RP11-6L6.2	protein_coding	0.0486641	-0.91464	0.530476	12.2482	7.2363	8.37754	3.66177	10.1058	28.7135	14.9891
ENSG00000137699	TRIM29	protein_coding	0.00995617	-1.57216	0.336303	12.2054	5.42723	2.39358	8.23899	32.155	17.2281	17.6343
ENSG00000126010	GRPR	protein_coding	0.0220385	-1.12951	0.45707	12.2029	9.04538	3.59038	6.40811	20.2117	24.885	12.344
ENSG00000263482	ANTXRLP1	unprocessed_pseudogene	0.0285937	-1.08507	0.471369	12.1013	1.80908	11.9679	5.49266	13.7807	22.0137	18.516
ENSG00000182601	HS3ST4	protein_coding	0.0181499	-1.21252	0.431515	11.7226	4.52269	3.59038	8.23899	16.5368	20.0994	14.9891
ENSG00000142224	IL19	protein_coding	9.62741e-06	-4.3205	0.0500494	11.6742	0	1.19679	1.83089	18.3743	34.4562	23.8062
ENSG00000135299	ANKRD6	protein_coding	0.0239146	-1.10126	0.466109	11.6199	3.61815	5.98396	10.0699	16.5368	22.9708	17.6343
ENSG00000233103	RP11-524P6.1	lincRNA	5.72433e-07	-7.42953	0.00580082	11.5502	0	0	0	23.8865	22.9708	21.1611
ENSG00000179676	LINC00305	lincRNA	0.000133115	-3.4709	0.090189	11.4608	0.904538	2.39358	0.915444	22.0491	15.3139	21.1611
ENSG00000184672	RALYL	protein_coding	0.00813699	-1.67805	0.312505	11.0867	3.61815	4.78717	1.83089	14.6994	19.1423	9.69884
ENSG00000261319	LINC02152	lincRNA	9.15815e-05	-3.82199	0.0707076	10.9546	0.904538	0	1.83089	21.1304	20.0994	14.1074
ENSG00000243926	TIPARP-AS1	antisense	0.0419863	-1.02512	0.491369	10.8559	4.52269	1.19679	7.32355	13.7807	17.2281	9.69884
ENSG00000196167	COLCA1	antisense	0.00872464	-1.63861	0.321167	10.6642	2.71361	3.59038	4.57722	9.18713	21.0566	15.8708
ENSG00000160460	SPTBN4	protein_coding	0.0417596	-0.969191	0.510792	10.3925	5.42723	4.78717	5.49266	17.4556	15.3139	11.4623
ENSG00000145569	FAM105A	protein_coding	0.0298324	-1.16972	0.444508	10.2951	2.71361	9.57434	2.74633	11.9433	14.3567	20.2794
ENSG00000256469	RP11-856F16.2	antisense	0.000139469	-2.45527	0.182343	10.2806	3.61815	4.78717	1.83089	16.5368	28.7135	22.0428
ENSG00000184374	COLEC10	protein_coding	0.00130924	-2.02906	0.245014	10.2315	0.904538	9.57434	2.74633	27.5614	20.0994	16.7525
ENSG00000135248	FAM71F1	protein_coding	0.000530891	-2.08685	0.235393	10.1688	3.61815	7.18075	1.83089	21.1304	23.9279	18.516
ENSG00000166006	KCNC2	protein_coding	0.000111996	-3.06476	0.119513	10.1516	2.71361	1.19679	0.915444	15.6181	20.0994	16.7525
ENSG00000260289	CTD-2535I10.1	lincRNA	0.000517587	-2.82643	0.140981	10.1316	1.80908	3.59038	0	12.862	20.0994	14.1074
ENSG00000253616	RP11-875O11.3	antisense	0.0124708	-1.37112	0.386592	10.1266	4.52269	4.78717	5.49266	16.5368	11.4854	22.9245
ENSG00000142149	HUNK	protein_coding	0.000566438	-2.26877	0.207506	10.1105	3.61815	2.39358	3.66177	11.0246	25.8421	22.9245
ENSG00000197261	C6orf141	protein_coding	0.0119885	-1.28645	0.40996	9.98388	6.33177	4.78717	5.49266	15.6181	16.271	21.1611
ENSG00000126264	HCST	protein_coding	0.0483724	-1.1488	0.451	9.97641	2.71361	2.39358	3.66177	15.6181	8.61405	8.81713
ENSG00000236938	AC003092.2	lincRNA	3.16301e-06	-7.1252	0.00716311	9.82294	0	0	0	21.1304	21.0566	15.8708
ENSG00000173404	INSM1	protein_coding	0.0134742	-1.86636	0.274264	9.55523	3.61815	2.39358	0	12.862	11.4854	7.93542
ENSG00000233308	OSTN-AS1	antisense	0.0107275	-1.41586	0.374786	9.4303	6.33177	7.18075	1.83089	21.1304	15.3139	16.7525
ENSG00000225542	ZNF385D-AS1	antisense	0.00681065	-3.45991	0.0908787	9.34367	0	1.19679	0	9.18713	7.65693	5.29028
ENSG00000265751	RP11-296E23.1	antisense	0.000159126	-3.39775	0.0948804	9.21559	2.71361	0	0.915444	14.6994	22.0137	17.6343
ENSG00000196872	KIAA1211L	protein_coding	0.020187	-1.54793	0.342001	8.9927	5.42723	2.39358	0.915444	9.18713	15.3139	14.1074
ENSG00000255364	SMILR	lincRNA	0.0426624	-1.02849	0.490224	8.98988	3.61815	2.39358	9.15444	14.6994	15.3139	17.6343
ENSG00000235491	LINC01889	lincRNA	0.0107794	-1.66514	0.315313	8.97661	0.904538	3.59038	4.57722	11.0246	15.3139	13.2257
ENSG00000253882	RP11-61L23.2	transcribed_unprocessed_pseudogene	0.0352924	-1.23494	0.42486	8.77135	2.71361	4.78717	1.83089	11.0246	9.57117	11.4623
ENSG00000169758	TMEM266	protein_coding	0.0137002	-1.65982	0.316479	8.37861	2.71361	2.39358	2.74633	11.9433	8.61405	14.9891
ENSG00000249881	CTB-57H20.1	sense_overlapping	0.00551231	-1.90225	0.267527	8.33262	0.904538	3.59038	3.66177	11.9433	17.2281	11.4623
ENSG00000151632	AKR1C2	protein_coding	0.00093536	-3.39723	0.0949141	8.32833	0.904538	2.39358	0	14.6994	11.4854	19.3977
ENSG00000227838	RP1-213J1P__B.1	lincRNA	0.000947909	-3.32367	0.0998794	8.19029	0.904538	0	1.83089	11.9433	19.1423	10.5806
ENSG00000229719	MIR194-2HG	lincRNA	0.0361053	-1.1793	0.441567	8.15941	2.71361	4.78717	4.57722	9.18713	13.3996	18.516
ENSG00000281181	CH507-513H4.3	lincRNA	0.0210678	-1.54226	0.343348	8.1447	2.71361	2.39358	4.57722	13.7807	18.1852	11.4623
ENSG00000184500	PROS1	protein_coding	0.00355753	-2.44601	0.183517	7.51149	0	2.39358	2.74633	8.26842	15.3139	14.9891
ENSG00000186367	KIAA1024L	protein_coding	0.0102259	-1.90814	0.266436	7.18185	1.80908	1.19679	4.57722	9.18713	11.4854	22.0428
ENSG00000144285	SCN1A	protein_coding	0.0200125	-1.4559	0.364528	7.13381	3.61815	3.59038	2.74633	7.34971	16.271	15.8708
ENSG00000260058	RP11-279O17.3	lincRNA	0.00331932	-3.90123	0.0669285	6.9995	0.904538	0	0	4.59357	14.3567	9.69884
ENSG00000225963	AC009950.2	antisense	0.0184104	-2.37338	0.192992	6.96782	0.904538	2.39358	0	5.51228	4.78558	16.7525
ENSG00000250433	CLSTN2-AS1	antisense	0.0169152	-1.5687	0.337112	6.95002	4.52269	3.59038	0.915444	11.9433	10.5283	15.8708
ENSG00000259345	RP11-624L4.1	lincRNA	0.0490997	-1.19884	0.435624	6.84575	2.71361	1.19679	3.66177	7.34971	8.61405	14.9891
ENSG00000137507	LRRC32	protein_coding	0.002761	-2.75317	0.148325	6.8082	0.904538	0	2.74633	12.862	15.3139	9.69884
ENSG00000234056	LINC00463	lincRNA	0.0052624	-2.30334	0.202594	6.8041	1.80908	1.19679	1.83089	12.862	8.61405	13.2257
ENSG00000265019	NCOR1P2	unprocessed_pseudogene	0.0204187	-2.09521	0.234033	6.73375	0	1.19679	2.74633	8.26842	9.57117	10.5806
ENSG00000277656	GSTT1	protein_coding	0.00354668	-3.45104	0.0914395	6.62275	0.904538	1.19679	0	10.1058	12.4425	11.4623
ENSG00000157150	TIMP4	protein_coding	0.00350772	-2.45666	0.182168	6.59543	1.80908	3.59038	0	18.3743	8.61405	12.344
ENSG00000255621	RP11-377D9.3	lincRNA	0.000638772	-4.57754	0.0418815	6.43559	0	0	0.915444	10.1058	20.0994	11.4623
ENSG00000169994	MYO7B	protein_coding	0.00927095	-2.38624	0.19128	6.30922	2.71361	0	0.915444	9.18713	12.4425	9.69884
ENSG00000143061	IGSF3	protein_coding	0.029173	-1.36382	0.388553	6.18372	4.52269	2.39358	2.74633	10.1058	18.1852	10.5806
ENSG00000188373	C10orf99	protein_coding	0.00809339	-3.18822	0.109711	5.7586	0.904538	1.19679	0	15.6181	8.61405	6.17199
ENSG00000230266	XXYLT1-AS2	antisense	0.0162789	-2.36516	0.194096	5.69183	0.904538	0	1.83089	8.26842	6.69982	9.69884
ENSG00000223351	ZNF385D-AS2	lincRNA	0.019896	-1.73954	0.299464	5.42508	0.904538	4.78717	1.83089	13.7807	15.3139	8.81713
ENSG00000263110	RP11-189E14.3	lincRNA	0.00334133	-3.89816	0.0670714	5.12187	0	1.19679	0	7.34971	8.61405	13.2257
ENSG00000131951	LRRC9	protein_coding	0.0137632	-2.57044	0.168353	4.90799	0.904538	0	1.83089	8.26842	8.61405	12.344
ENSG00000164742	ADCY1	protein_coding	0.0244113	-2.20282	0.217212	4.65442	0.904538	2.39358	0	8.26842	8.61405	7.93542
ENSG00000166669	ATF7IP2	protein_coding	0.0281867	-2.20555	0.216802	4.13865	0.904538	0	1.83089	6.43099	9.57117	8.81713
ENSG00000262950	RP11-189E14.5	lincRNA	0.000313685	-5.74747	0.0186139	4.00272	0	0	0	10.1058	10.5283	8.81713
ENSG00000156298	TSPAN7	protein_coding	0.00999849	-3.42384	0.09318	3.93986	0	0	0.915444	7.34971	8.61405	7.0537

## Sheet: UP FC 1.5 Cys vs Tat
ensID	gene_name	gene_type	padj	log2FC	FC	mean count	Cys.1	Cys.2	Cys.3	Tat.1	Tat.2	Tat.3
ENSG00000176406	RIMS2	protein_coding	7.05615e-35	1.68709	3.22007	532.679	1197.78	1504.09	1400.47	369.491	437.656	447.293
ENSG00000182459	TEX19	protein_coding	2.22931e-28	1.07518	2.10699	1329.63	1171.54	1035.03	1044.4	549.375	472.16	506.403
ENSG00000143153	ATP1B1	protein_coding	1.03114e-26	0.850145	1.80268	729.086	815.105	807.684	767.968	441.445	445.828	426.12
ENSG00000233067	PTCHD1-AS	lincRNA	7.97229e-26	1.74394	3.3495	198.928	284.97	356.577	340.505	80.7047	93.5241	112.044
ENSG00000169855	ROBO1	protein_coding	1.44783e-24	1.19732	2.29313	1065.81	1461.04	1754.17	1671.41	641.748	727.308	728.726
ENSG00000169245	CXCL10	protein_coding	4.20667e-22	2.5362	5.80059	70.29	148.365	120.853	149.2	26.2533	17.252	26.4671
ENSG00000132465	JCHAIN	protein_coding	7.41686e-21	1.17256	2.25412	2704.95	4244.7	3477.23	3569.81	1683.13	1505.46	1737.12
ENSG00000136960	ENPP2	protein_coding	6.43385e-20	0.817171	1.76195	527.251	651.361	604.267	662.704	366.574	353.212	355.541
ENSG00000065308	TRAM2	protein_coding	2.96579e-19	1.02697	2.03773	836.103	928.189	1080.5	1006.87	410.33	540.26	503.756
ENSG00000244342	LINC00698	lincRNA	4.80733e-18	1.39572	2.6312	584.387	1116.36	1475.37	1367.51	411.302	497.584	561.102
ENSG00000117228	GBP1	protein_coding	1.49896e-17	0.946854	1.92766	226.05	399.863	393.671	374.373	200.303	195.22	200.267
ENSG00000183032	SLC25A21	protein_coding	1.73032e-15	1.41169	2.66048	232.041	151.079	162.733	162.93	44.7279	58.112	70.5788
ENSG00000267761	CTD-2130O13.1	lincRNA	7.61028e-15	1.6125	3.05782	895.654	1062.98	1529.21	1569.8	350.045	499.4	466.702
ENSG00000080166	DCT	protein_coding	1.02795e-14	0.929472	1.90458	324.043	294.922	308.715	304.807	145.852	170.704	150.862
ENSG00000068366	ACSL4	protein_coding	6.41688e-14	0.720923	1.64824	975.106	980.659	871.102	920.829	474.505	607.452	574.335
ENSG00000188404	SELL	protein_coding	1.13926e-13	0.58674	1.50185	1328.69	1234.87	1110.42	1111.22	786.628	719.136	769.309
ENSG00000155307	SAMSN1	protein_coding	3.55092e-13	0.699431	1.62386	600.824	945.377	1039.82	1018.77	592.159	568.408	659.912
ENSG00000102096	PIM2	protein_coding	1.70305e-12	0.682298	1.60469	660.004	910.095	847.17	939.136	583.408	483.056	589.333
ENSG00000232079	LINC01697	processed_transcript	1.91368e-12	0.65393	1.57345	599.773	683.929	716.744	713.048	425.887	454	442
ENSG00000183508	FAM46C	protein_coding	2.98282e-12	0.781613	1.71905	295.036	529.23	598.284	545.541	311.151	305.996	336.132
ENSG00000082482	KCNK2	protein_coding	5.11382e-12	0.891003	1.85446	464.078	473.141	576.746	497.943	238.225	296.916	278.786
ENSG00000135919	SERPINE2	protein_coding	5.11382e-12	2.15122	4.44202	39.4455	65.1361	81.3666	74.1423	18.4746	13.62	14.998
ENSG00000163285	GABRG1	protein_coding	9.99268e-12	1.19663	2.29204	150.519	351.916	287.176	272.77	113.764	125.304	146.451
ENSG00000213047	DENND1B	protein_coding	1.07257e-11	0.637828	1.55598	675.372	1350.67	1405.97	1326.32	781.766	855.336	941.345
ENSG00000242759	LINC00882	lincRNA	1.35583e-11	1.48051	2.79048	103.404	112.179	130.426	136.385	39.8662	49.94	40.5828
ENSG00000106034	CPED1	protein_coding	5.80734e-11	0.744061	1.67488	837.94	1005.99	1079.3	1049.89	537.707	618.348	676.674
ENSG00000092820	EZR	protein_coding	8.65403e-11	0.725111	1.65303	612.99	756.302	655.719	628.837	444.362	361.384	405.828
ENSG00000196562	SULF2	protein_coding	1.10783e-10	1.20329	2.30264	370.624	108.56	87.3495	91.5337	37.9215	43.584	39.7006
ENSG00000004468	CD38	protein_coding	2.57471e-10	0.690995	1.6144	900.538	1290.96	1517.25	1476.44	827.466	941.597	831.066
ENSG00000143333	RGS16	protein_coding	3.47565e-10	0.810804	1.75419	319.274	413.433	324.27	351.489	218.778	177.06	212.619
ENSG00000167851	CD300A	protein_coding	5.06786e-10	0.678469	1.60044	401.706	474.046	447.517	433.87	287.814	266.044	277.022
ENSG00000180772	AGTR2	protein_coding	8.22579e-09	1.12126	2.17536	103.256	189.075	157.947	163.845	80.7047	69.916	75.8722
ENSG00000117322	CR2	protein_coding	9.29503e-09	0.702558	1.62739	324.916	359.153	343.415	333.183	213.916	197.036	210.854
ENSG00000242317	RP11-875H7.5	lincRNA	1.697e-08	2.35332	5.10999	38.0013	33.4727	50.2559	40.2748	6.80642	9.08	6.17565
ENSG00000100154	TTC28	protein_coding	2.59211e-08	1.40052	2.63997	88.0377	157.412	258.459	198.628	66.1195	74.456	79.4012
ENSG00000254119	RP11-705O24.1	lincRNA	4.64598e-08	1.00227	2.00315	1623.68	1252.06	1750.58	1619.23	593.131	728.216	895.469
ENSG00000198734	F5	protein_coding	5.76145e-08	1.18844	2.27907	317.061	221.644	295.552	297.485	71.9536	147.096	120.866
ENSG00000111728	ST8SIA1	protein_coding	5.83605e-08	0.688784	1.61192	296.385	275.924	258.459	289.247	157.52	178.876	162.331
ENSG00000152578	GRIA4	protein_coding	1.3044e-07	0.90829	1.87682	142.936	268.686	259.655	247.141	133.211	132.568	132.335
ENSG00000140511	HAPLN3	protein_coding	1.3165e-07	0.848942	1.80118	143.457	191.789	179.485	187.644	115.709	84.444	100.575
ENSG00000150054	MPP7	protein_coding	1.38728e-07	1.10293	2.1479	97.3246	168.268	180.682	211.443	91.4005	81.72	76.7545
ENSG00000152767	FARP1	protein_coding	1.85011e-07	1.25002	2.37844	81.2028	90.4667	101.708	98.8564	40.8385	36.32	38.8184
ENSG00000165164	CFAP47	protein_coding	2.34859e-07	0.796378	1.73673	1196.9	1255.68	1525.62	1411.45	625.218	848.072	858.415
ENSG00000064666	CNN2	protein_coding	2.95367e-07	0.895119	1.85976	112.193	149.27	166.323	148.285	87.5111	75.364	76.7545
ENSG00000181418	DDN	protein_coding	3.07112e-07	0.791211	1.73053	159.604	220.739	230.938	236.157	142.935	121.672	119.984
ENSG00000136261	BZW2	protein_coding	3.91093e-07	0.598028	1.51365	270.021	502.09	416.406	454.923	292.676	306.904	287.609
ENSG00000147655	RSPO2	protein_coding	6.21485e-07	3.22094	9.32397	10.8484	33.4727	38.2902	37.5288	1.94469	3.632	4.41118
ENSG00000204161	C10orf128	protein_coding	1.35082e-06	0.911084	1.88046	115.743	127.558	132.819	118.078	65.1472	68.1	59.1098
ENSG00000069667	RORA	protein_coding	1.35313e-06	0.603671	1.51958	754.65	839.531	991.955	936.39	503.675	637.416	627.269
ENSG00000166676	TVP23A	protein_coding	3.27075e-06	0.892669	1.85661	88.7249	144.747	134.016	151.031	71.9536	77.18	72.3433
ENSG00000120594	PLXDC2	protein_coding	3.39343e-06	1.20883	2.3115	55.3977	68.7547	90.9392	79.6343	36.9491	29.964	29.996
ENSG00000187676	B3GLCT	protein_coding	3.39343e-06	0.933932	1.91048	89.5423	124.844	119.657	118.078	53.479	63.56	63.5209
ENSG00000156011	PSD3	protein_coding	3.5456e-06	0.722506	1.65005	176.435	268.686	260.852	328.606	170.161	174.336	157.92
ENSG00000258590	NBEAP1	transcribed_unprocessed_pseudogene	4.02335e-06	0.683653	1.6062	294.389	379.056	457.089	432.039	201.276	271.492	286.726
ENSG00000243440	AF165138.7	protein_coding	5.57764e-06	1.15309	2.2239	54.165	101.323	110.084	90.6184	48.6173	43.584	35.2894
ENSG00000241743	XACT	lincRNA	6.19971e-06	0.862953	1.81876	744.897	946.282	1306.65	1156.99	456.03	617.44	712.846
ENSG00000150361	KLHL1	protein_coding	6.92094e-06	2.42969	5.38777	17.3959	20.8073	28.7176	30.2061	4.86173	5.448	2.64671
ENSG00000091490	SEL1L3	protein_coding	7.11506e-06	1.32321	2.50223	35.1791	70.5641	81.3666	64.0736	23.3363	23.608	32.6427
ENSG00000187323	DCC	protein_coding	7.85172e-06	0.823215	1.76935	2599.7	2477.88	3523.89	3102.99	1232.93	1821.45	1859.75
ENSG00000163520	FBLN2	protein_coding	7.9792e-06	1.87508	3.66822	21.524	38.9007	37.0936	58.5816	11.6682	10.896	10.5868
ENSG00000196141	SPATS2L	protein_coding	8.62788e-06	0.607431	1.52354	410.036	496.662	635.378	562.017	339.349	401.336	332.603
ENSG00000185565	LSAMP	protein_coding	9.4983e-06	0.711891	1.63795	923.901	1444.75	1770.92	1664.08	806.075	1005.16	1048.1
ENSG00000257747	RP11-362A1.1	lincRNA	1.41113e-05	1.56465	2.95806	29.3474	42.5194	58.6318	49.4282	18.4746	16.344	11.4691
ENSG00000242741	LINC02005	lincRNA	2.11801e-05	0.725692	1.65369	324.003	254.212	247.69	287.416	124.46	150.728	181.74
ENSG00000053254	FOXN3	protein_coding	2.37063e-05	1.13486	2.19598	100.926	50.6614	72.9907	72.3116	24.3086	34.504	23.8204
ENSG00000251301	RP11-81H14.2	lincRNA	2.37063e-05	0.883952	1.84542	81.0785	117.607	99.3152	120.825	67.0919	53.572	53.8164
ENSG00000050730	TNIP3	protein_coding	3.80388e-05	1.21653	2.32388	54.8816	64.2314	45.4696	62.2429	26.2533	16.344	26.4671
ENSG00000257642	KCCAT198	antisense	3.80388e-05	0.636114	1.55414	454.259	319.348	445.123	434.785	222.667	277.848	239.086
ENSG00000135549	PKIB	protein_coding	4.30531e-05	0.589181	1.50439	178.89	261.449	263.245	266.363	162.382	176.152	167.625
ENSG00000266602	RP11-476K15.1	lincRNA	4.67652e-05	0.743147	1.67382	212.139	308.492	293.159	271.855	134.184	177.968	184.387
ENSG00000256389	RP11-606D9.1	lincRNA	5.12636e-05	1.35855	2.56428	26.968	53.3754	52.649	56.7509	18.4746	24.516	14.998
ENSG00000134508	CABLES1	protein_coding	6.7414e-05	0.638208	1.55639	193.628	200.836	245.296	243.48	136.128	154.36	133.218
ENSG00000090013	BLVRB	protein_coding	7.90129e-05	1.30739	2.47494	34.9018	43.424	39.4868	43.9362	15.5575	15.436	15.8802
ENSG00000014257	ACPP	protein_coding	7.96641e-05	0.639462	1.55775	234.958	180.933	185.468	204.12	113.764	123.488	113.808
ENSG00000235448	LURAP1L-AS1	antisense	8.49126e-05	1.03607	2.05063	43.4581	64.2314	78.9735	66.8196	32.0874	29.964	32.6427
ENSG00000133065	SLC41A1	protein_coding	9.19092e-05	1.14021	2.20413	42.1172	57.8987	74.1872	73.227	28.198	30.872	26.4671
ENSG00000081377	CDC14B	protein_coding	0.000106448	0.725962	1.654	101.193	142.033	165.126	152.861	86.5388	80.812	96.1636
ENSG00000233005	AC067959.1	lincRNA	0.000119028	0.926042	1.90006	150.712	83.2294	108.888	99.7718	38.8938	45.4	58.2275
ENSG00000130158	DOCK6	protein_coding	0.000145943	1.48535	2.79985	34.3883	28.0447	43.0765	39.3595	12.6405	12.712	9.70459
ENSG00000216775	RP1-152L7.5	transcribed_unprocessed_pseudogene	0.000151512	0.739671	1.66979	138.865	140.223	136.409	118.994	75.843	60.836	87.3413
ENSG00000124788	ATXN1	protein_coding	0.000156659	0.680066	1.60221	634.502	758.111	1048.19	1020.6	486.173	671.92	517.872
ENSG00000251432	RP11-420A23.1	lincRNA	0.000178443	0.747306	1.67866	237.686	237.928	289.57	222.427	103.069	170.704	146.451
ENSG00000156113	KCNMA1	protein_coding	0.000181348	0.730424	1.65913	214.645	370.914	506.148	484.213	195.442	294.192	284.962
ENSG00000138642	HERC6	protein_coding	0.000190247	0.691225	1.61465	108.088	156.507	156.75	164.761	104.041	100.788	76.7545
ENSG00000118515	SGK1	protein_coding	0.000261456	0.615691	1.53229	309.537	200.836	138.802	162.015	124.46	88.984	101.457
ENSG00000162692	VCAM1	protein_coding	0.000350348	1.37865	2.60026	28.8273	41.6147	41.8799	30.2061	16.5299	12.712	9.70459
ENSG00000237978	KCNMB2-AS1	antisense	0.000421902	0.706351	1.63167	132.55	143.842	204.613	213.274	87.5111	121.672	113.808
ENSG00000114757	PEX5L	protein_coding	0.000470082	0.609432	1.52566	149.939	188.171	240.51	230.665	129.322	138.016	142.04
ENSG00000118922	KLF12	protein_coding	0.000475511	0.684967	1.60767	129.599	161.935	178.289	188.559	78.76	123.488	106.75
ENSG00000144460	NYAP2	protein_coding	0.000516809	1.17005	2.25019	34.2102	49.7567	46.6662	41.1902	17.5022	12.712	24.7026
ENSG00000097096	SYDE2	protein_coding	0.000584921	0.679944	1.60208	92.6963	111.274	125.64	113.502	75.843	74.456	55.5808
ENSG00000083290	ULK2	protein_coding	0.000668759	0.71261	1.63877	129.106	94.9901	130.426	133.639	56.3961	85.352	62.6387
ENSG00000250590	RP11-565A3.2	lincRNA	0.000756338	1.18062	2.26675	31.4227	43.424	68.2044	66.8196	26.2533	22.7	21.1736
ENSG00000224218	RP11-359D14.3	antisense	0.000933861	1.51218	2.8524	33.8903	27.14	43.0765	48.5129	6.80642	19.068	9.70459
ENSG00000185518	SV2B	protein_coding	0.0010427	0.68361	1.60615	84.5768	113.988	98.1186	95.1951	64.1748	59.928	55.5808
ENSG00000059377	TBXAS1	protein_coding	0.00111059	0.635987	1.554	157.143	104.037	120.853	86.957	54.4514	72.64	59.992
ENSG00000225546	LVCAT5	lincRNA	0.00138315	0.814998	1.7593	100.316	107.655	116.067	97.0257	38.8938	50.848	76.7545
ENSG00000253140	RP11-567J20.3	lincRNA	0.00138472	0.706733	1.6321	78.9048	96.7994	92.1358	120.825	57.3684	55.388	64.4032
ENSG00000128791	TWSG1	protein_coding	0.001406	0.743421	1.67414	75.0065	109.465	134.016	122.655	62.2301	70.824	68.8144
ENSG00000248475	RP11-479O16.1	antisense	0.00166266	2.03036	4.08506	13.2201	16.284	22.7348	17.3914	2.91704	2.724	5.29341
ENSG00000164418	GRIK2	protein_coding	0.0017158	0.863607	1.81958	48.9796	94.0854	131.623	99.7718	42.7832	58.112	60.8742
ENSG00000074370	ATP2A3	protein_coding	0.00176088	1.16872	2.24812	50.164	28.9494	28.7176	24.7141	10.6958	11.804	9.70459
ENSG00000160606	TLCD1	protein_coding	0.00214375	0.638428	1.55663	88.8744	112.179	92.1358	92.4491	57.3684	67.192	53.8164
ENSG00000121797	CCRL2	protein_coding	0.00252742	1.19446	2.28859	24.3486	34.3774	43.0765	51.2589	17.5022	14.528	16.7625
ENSG00000233359	RP11-202K23.1	lincRNA	0.00254713	1.07511	2.10688	31.6623	49.7567	72.9907	47.5975	19.4469	27.24	23.8204
ENSG00000107518	ATRNL1	protein_coding	0.00271972	0.96813	1.9563	34.5846	44.3287	57.4353	59.4969	19.4469	19.976	33.5249
ENSG00000258601	RP11-81F13.2	antisense	0.00276082	2.27751	4.8484	17.4575	7.23734	13.1623	20.1374	0.972346	3.632	1.76447
ENSG00000010278	CD9	protein_coding	0.00278776	1.08803	2.12583	19.543	53.3754	43.0765	48.5129	22.364	18.16	19.4092
ENSG00000066294	CD84	protein_coding	0.00329903	0.655864	1.57556	82.5952	119.416	123.247	144.623	59.3131	97.1561	70.5788
ENSG00000169126	ARMC4	protein_coding	0.00358166	0.775064	1.71127	37.4312	68.7547	82.5632	81.465	40.8385	42.676	39.7006
ENSG00000145936	KCNMB1	protein_coding	0.00371046	1.6863	3.21831	10.7117	19.9027	22.7348	16.4761	3.88938	7.264	3.52894
ENSG00000151812	SLC35F4	protein_coding	0.0043425	0.594303	1.50974	1178.7	909.191	1300.67	1420.6	548.403	836.268	848.71
ENSG00000214595	EML6	protein_coding	0.00437553	0.629738	1.54728	95.9812	88.6574	90.9392	120.825	51.5343	67.192	60.8742
ENSG00000226674	TEX41	lincRNA	0.00438187	1.01243	2.01731	21.6187	52.4707	45.4696	40.2748	22.364	18.16	19.4092
ENSG00000162654	GBP4	protein_coding	0.00448088	0.645943	1.56476	72.4008	84.1341	82.5632	85.1264	55.4237	40.86	52.0519
ENSG00000132464	ENAM	protein_coding	0.00480797	0.984567	1.97872	29.7993	44.3287	35.897	42.1055	17.5022	16.344	20.2914
ENSG00000145850	TIMD4	protein_coding	0.00480797	0.63863	1.55685	113.981	113.988	68.2044	95.1951	57.3684	52.664	55.5808
ENSG00000233723	LINC01122	lincRNA	0.00517177	1.19804	2.29428	19.0971	28.0447	35.897	23.7988	7.77877	11.804	12.3513
ENSG00000197085	NPSR1-AS1	processed_transcript	0.00532433	0.928331	1.90307	52.7275	33.4727	53.8456	39.3595	15.5575	23.608	18.5269
ENSG00000115183	TANC1	protein_coding	0.00593307	1.44538	2.72334	11.6314	19.9027	33.5039	31.1215	11.6682	5.448	7.94012
ENSG00000253789	NARSP2	transcribed_processed_pseudogene	0.00654195	1.82326	3.53879	14.9156	16.284	10.7691	14.6454	1.94469	3.632	3.52894
ENSG00000112232	KHDRBS2	protein_coding	0.00660414	1.15968	2.23408	21.069	23.5214	25.1279	38.4442	7.77877	14.528	10.5868
ENSG00000077782	FGFR1	protein_coding	0.00690646	0.63964	1.55794	65.0632	80.5154	98.1186	88.7877	50.562	49.032	56.4631
ENSG00000259803	SLC22A31	protein_coding	0.00710307	0.954136	1.93742	34.6517	37.996	46.6662	31.1215	14.5852	15.436	21.1736
ENSG00000258231	RP11-362K2.2	lincRNA	0.00735914	0.643244	1.56184	101.79	181.838	293.159	245.31	108.903	158.9	151.744
ENSG00000181856	SLC2A4	protein_coding	0.00739515	1.13514	2.19641	21.1526	20.8073	29.9142	35.6981	8.75111	12.712	11.4691
ENSG00000187098	MITF	protein_coding	0.00747037	0.908679	1.87733	28.3865	51.566	57.4353	47.5975	20.4193	20.884	30.8782
ENSG00000121552	CSTA	protein_coding	0.0086101	0.816926	1.76165	64.6417	93.1807	61.025	84.211	49.5896	24.516	45.8762
ENSG00000134532	SOX5	protein_coding	0.00922968	0.626771	1.5441	75.5758	84.1341	78.9735	72.3116	41.8109	44.492	52.0519
ENSG00000155792	DEPTOR	protein_coding	0.0106755	0.609127	1.52534	95.3681	61.5174	55.0421	57.6662	25.281	43.584	34.4072
ENSG00000258751	RP11-2G1.1	lincRNA	0.011173	1.3154	2.48871	14.3384	17.1887	31.1108	26.5448	4.86173	9.08	9.70459
ENSG00000255733	IFNG-AS1	antisense	0.0119201	0.633273	1.55108	78.075	71.4687	94.5289	69.5656	35.9768	55.388	44.1118
ENSG00000052126	PLEKHA5	protein_coding	0.012013	0.620381	1.53728	64.8608	57.8987	61.025	66.8196	30.1427	39.952	38.8184
ENSG00000139144	PIK3C2G	protein_coding	0.0134131	0.624044	1.54119	50.8139	75.9921	81.3666	75.973	40.8385	47.216	47.6407
ENSG00000248975	CTD-2251F13.1	lincRNA	0.0145244	0.791011	1.73029	40.1267	40.71	67.0078	65.9043	27.2257	29.056	29.996
ENSG00000184557	SOCS3	protein_coding	0.0154918	1.02371	2.03314	19.1881	20.8073	25.1279	31.1215	10.6958	9.08	11.4691
ENSG00000275830	RP11-403A3.3	lincRNA	0.018201	1.20776	2.30978	13.6084	20.8073	27.5211	14.6454	6.80642	5.448	8.82235
ENSG00000185046	ANKS1B	protein_coding	0.0209145	0.733899	1.66313	53.1194	46.138	70.5975	61.3276	20.4193	38.136	32.6427
ENSG00000212866	HSPA1B	protein_coding	0.0234466	0.659969	1.58005	42.8614	66.0407	53.8456	52.1742	35.0045	34.504	25.5848
ENSG00000224322	AC004009.3	lincRNA	0.0253533	0.920103	1.89225	32.2797	20.8073	32.3073	31.1215	9.72346	12.712	13.2335
ENSG00000227018	IL6STP1	processed_pseudogene	0.0253949	1.47319	2.77636	12.9174	15.3793	8.37598	10.984	1.94469	4.54	2.64671
ENSG00000256008	RP11-728G15.1	antisense	0.0257538	0.719985	1.64717	37.1749	45.2334	51.4524	40.2748	33.0598	21.792	15.8802
ENSG00000150907	FOXO1	protein_coding	0.0260022	0.658774	1.57874	41.5384	56.0894	62.2215	69.5656	32.0874	28.148	42.3473
ENSG00000174600	CMKLR1	protein_coding	0.0280205	0.984088	1.97806	14.9291	21.712	29.9142	33.8675	7.77877	12.712	13.2335
ENSG00000163554	SPTA1	protein_coding	0.028101	0.776607	1.7131	21.3045	37.996	35.897	37.5288	14.5852	20.884	18.5269
ENSG00000090006	LTBP4	protein_coding	0.0290141	0.896479	1.86152	21.2189	36.1867	32.3073	19.2221	11.6682	12.712	13.2335
ENSG00000017427	IGF1	protein_coding	0.0294752	0.989906	1.98606	15.4551	24.426	25.1279	21.0528	12.6405	8.172	7.05788
ENSG00000237372	UNQ6494	lincRNA	0.0307544	0.944482	1.9245	15.1287	20.8073	28.7176	22.8834	7.77877	11.804	9.70459
ENSG00000152056	AP1S3	protein_coding	0.0352507	0.798247	1.73899	20.9632	39.8054	27.5211	36.6135	10.6958	21.792	15.8802
ENSG00000153714	LURAP1L	protein_coding	0.0384512	0.767978	1.70288	30.0293	27.14	40.6833	35.6981	10.6958	19.976	17.6447
ENSG00000176533	GNG7	protein_coding	0.0396044	0.687753	1.61077	30.9488	55.1847	34.7005	45.7669	20.4193	31.78	17.6447
ENSG00000223883	LINC01707	lincRNA	0.0426196	0.594444	1.50989	38.0687	54.28	44.273	64.9889	31.1151	29.964	30.8782
ENSG00000167291	TBC1D16	protein_coding	0.0462313	0.674627	1.59618	26.6078	35.282	40.6833	47.5975	21.3916	18.16	22.9381
ENSG00000226525	RPS7P10	processed_pseudogene	0.0473779	0.613976	1.53047	46.607	75.0874	34.7005	68.6503	32.0874	26.332	38.8184
ENSG00000228033	AC010967.2	lincRNA	0.0479365	0.638528	1.55674	31.2063	35.282	45.4696	45.7669	21.3916	16.344	28.2315
ENSG00000171587	DSCAM	protein_coding	0.0487095	1.445	2.72263	55.6181	8.14201	10.7691	4.57669	1.94469	0.908	2.64671
ENSG00000204745	AC083899.3	unprocessed_pseudogene	0.0490748	0.680427	1.60261	41.1865	68.7547	27.5211	79.6343	22.364	38.136	28.2315

## Sheet: DOWN FC 1.5 Cys vs Tat
ensID	gene_name	gene_type	padj	log2FC	FC	mean count	Cys.1	Cys.2	Cys.3	Tat.1	Tat.2	Tat.3
ENSG00000242265	PEG10	protein_coding	4.14892e-162	-2.11685	0.230549	11043.2	5463.29	6283.18	6474.18	24928	27329.9	26949.6
ENSG00000186480	INSIG1	protein_coding	1.47954e-108	-1.18753	0.439053	3466.24	2837.94	2657.58	2768.89	6082.02	6329.67	6480.9
ENSG00000099875	MKNK2	protein_coding	1.71448e-101	-1.31627	0.401571	2599.97	1895.28	1847.5	1881.02	4909.37	4615.37	4542.63
ENSG00000154678	PDE1C	protein_coding	9.66251e-74	-3.04294	0.121334	225.314	49.7567	64.6147	52.1742	395.745	465.804	514.343
ENSG00000005379	TSPOAP1	protein_coding	1.16273e-64	-2.61614	0.163104	150.527	64.2314	74.1872	65.9043	446.307	404.06	411.122
ENSG00000283408	RP1-242N11.1	lincRNA	3.22408e-40	-2.12145	0.229816	174.523	78.7061	72.9907	83.2957	303.372	398.612	338.778
ENSG00000149485	FADS1	protein_coding	3.86467e-40	-0.750795	0.594276	4414.11	3776.99	3476.03	3799.56	6436.93	5978.28	6294.75
ENSG00000133639	BTG1	protein_coding	2.7082e-38	-0.705543	0.613211	4702.2	3864.74	3970.21	3933.2	6478.74	6267.93	6541.77
ENSG00000171848	RRM2	protein_coding	8.1824e-38	-0.652263	0.636281	7447.85	7034.69	6881.46	6781.73	11023.5	10462.9	11204.4
ENSG00000178860	MSC	protein_coding	3.04759e-35	-0.919701	0.528618	1615.27	1106.41	1064.95	1055.38	2190.7	1910.43	2060.9
ENSG00000117090	SLAMF1	protein_coding	3.97478e-28	-0.806497	0.571768	947.369	740.923	728.71	778.952	1245.58	1397.41	1324.24
ENSG00000165899	OTOGL	protein_coding	3.34171e-24	-2.89033	0.134873	52.6819	17.1887	17.9485	14.6454	121.543	129.844	128.806
ENSG00000100906	NFKBIA	protein_coding	1.77926e-20	-0.941688	0.520623	1476.41	1374.19	1142.72	1221.06	2639.92	2230.96	2412.91
ENSG00000139304	PTPRQ	protein_coding	1.72382e-18	-2.91452	0.13263	44.7885	10.856	17.9485	10.0687	80.7047	104.42	113.808
ENSG00000048740	CELF2	protein_coding	2.61643e-17	-1.09081	0.469499	784.355	338.346	419.995	378.034	752.596	876.22	828.419
ENSG00000184014	DENND5A	protein_coding	1.0568e-16	-0.838319	0.559295	335.779	326.585	330.253	313.961	598.965	591.108	569.924
ENSG00000230975	AC084193.1	lincRNA	1.46374e-16	-1.70469	0.306787	249.671	103.132	163.93	166.591	386.994	550.248	515.225
ENSG00000005302	MSL3	protein_coding	2.15145e-16	-0.735261	0.600709	676.622	398.054	363.757	351.489	660.223	583.844	635.209
ENSG00000169116	PARM1	protein_coding	4.80423e-16	-0.951771	0.516997	1761.69	942.663	1159.47	1048.06	1823.15	2188.28	2180.89
ENSG00000118432	CNR1	protein_coding	5.25486e-16	-0.862427	0.550026	446.978	302.159	302.732	344.167	547.431	620.164	586.686
ENSG00000046889	PREX2	protein_coding	7.96239e-16	-1.74991	0.29732	112.644	51.566	46.6662	63.1583	148.769	182.508	232.028
ENSG00000137573	SULF1	protein_coding	9.64542e-16	-0.780086	0.582332	1561.3	855.815	962.041	983.987	1477.97	1736.1	1663.01
ENSG00000267382	RP11-325K19.2	transcribed_unprocessed_pseudogene	3.16722e-15	-1.69494	0.308867	68.3062	56.994	46.6662	49.4282	149.741	186.14	178.212
ENSG00000143297	FCRL5	protein_coding	1.09581e-14	-0.907149	0.533238	415.91	302.159	368.543	355.151	569.795	710.056	673.146
ENSG00000109158	GABRA4	protein_coding	2.00457e-14	-0.613969	0.653396	3568.81	2495.07	2493.65	2432.97	3512.11	3830.85	4155.33
ENSG00000169826	CSGALNACT2	protein_coding	3.77081e-13	-0.691708	0.619121	784.852	600.699	697.599	670.027	993.737	1155.88	1072.8
ENSG00000165617	DACT1	protein_coding	8.627e-13	-0.774746	0.584491	340.824	264.163	246.493	216.935	404.496	417.68	443.764
ENSG00000160505	NLRP4	protein_coding	3.31213e-12	-0.970313	0.510395	160.441	171.887	187.861	188.559	379.215	335.052	383.772
ENSG00000152785	BMP3	protein_coding	3.78069e-12	-2.05608	0.240469	44.0905	28.0447	17.9485	16.4761	93.3452	97.1561	83.8124
ENSG00000099250	NRP1	protein_coding	4.14453e-12	-0.994909	0.501768	242.225	101.323	117.264	109.84	196.414	244.252	226.734
ENSG00000230448	LINC00276	lincRNA	5.29995e-12	-1.11657	0.46119	517.636	301.254	394.868	332.267	592.159	812.66	880.471
ENSG00000107249	GLIS3	protein_coding	5.51855e-12	-1.30872	0.403679	190.25	65.1361	78.9735	86.957	183.773	218.828	187.916
ENSG00000179456	ZBTB18	protein_coding	9.61613e-12	-0.724313	0.605285	474.926	343.774	318.287	284.67	540.624	493.952	555.808
ENSG00000113302	IL12B	protein_coding	2.0145e-11	-1.26987	0.414697	87.3178	56.994	53.8456	60.4123	144.88	131.66	151.744
ENSG00000170365	SMAD1	protein_coding	2.85496e-11	-0.647025	0.638596	501.117	376.342	315.894	345.997	545.486	534.812	576.1
ENSG00000173198	CYSLTR1	protein_coding	5.80734e-11	-0.837861	0.559472	364.065	190.885	177.092	204.12	305.317	363.2	379.361
ENSG00000197565	COL4A6	protein_coding	6.66791e-11	-0.697493	0.616643	873.976	616.983	661.702	601.377	911.088	1102.31	1088.68
ENSG00000251562	MALAT1	lincRNA	8.89863e-11	-0.904029	0.534392	34781.4	26390.1	33561.3	32704.1	50983	64543.4	62232
ENSG00000151575	TEX9	protein_coding	1.23552e-10	-0.717227	0.608265	355.45	211.692	223.758	235.242	348.1	388.624	387.301
ENSG00000265206	RP5-1171I10.5	antisense	1.88014e-10	-0.631122	0.645674	1129.54	1053.94	966.827	984.903	1640.35	1482.76	1617.14
ENSG00000158457	TSPAN33	protein_coding	2.09824e-10	-0.596996	0.661129	754.516	597.985	537.259	583.985	881.918	881.668	883.118
ENSG00000130592	LSP1	protein_coding	2.73069e-10	-0.61769	0.651713	796.885	531.944	519.311	501.605	854.692	787.236	783.425
ENSG00000163818	LZTFL1	protein_coding	5.06786e-10	-1.14213	0.45309	112.423	97.7041	132.819	98.8564	213.916	268.768	263.788
ENSG00000197826	C4orf22	protein_coding	5.06786e-10	-1.07126	0.475903	183.437	124.844	134.016	119.909	238.225	302.364	279.669
ENSG00000105974	CAV1	protein_coding	6.95232e-10	-0.642349	0.640669	1958.12	1318.1	1609.38	1585.36	2114.85	2585.99	2472.02
ENSG00000270069	MIR222HG	lincRNA	7.22391e-10	-0.962712	0.513091	205.744	162.84	193.844	183.067	321.846	390.44	368.774
ENSG00000114423	CBLB	protein_coding	7.5415e-10	-0.876455	0.544704	404.442	303.968	344.612	354.235	529.928	691.896	666.97
ENSG00000168528	SERINC2	protein_coding	3.10439e-09	-0.793472	0.576954	204.179	137.509	137.605	129.978	235.308	251.516	232.91
ENSG00000265972	TXNIP	protein_coding	3.76382e-09	-0.643604	0.640112	715.47	781.633	647.343	688.334	1105.56	1131.37	1144.26
ENSG00000047648	ARHGAP6	protein_coding	6.14557e-09	-1.0605	0.479465	1229.12	460.476	661.702	603.207	1005.41	1378.34	1345.41
ENSG00000172572	PDE3A	protein_coding	8.10002e-09	-0.747266	0.595731	269.753	282.256	323.073	282.839	449.224	511.204	563.748
ENSG00000170379	TCAF2	protein_coding	1.13025e-08	-0.942693	0.520261	154.039	73.2781	81.3666	69.5656	153.631	135.292	154.391
ENSG00000159388	BTG2	protein_coding	3.46429e-08	-0.677545	0.625228	426.405	401.672	380.509	361.558	695.227	536.628	644.032
ENSG00000185352	HS6ST3	protein_coding	4.01959e-08	-0.817651	0.567365	2142.47	774.395	984.776	930.898	1318.5	1769.69	1785.64
ENSG00000232368	FTLP2	processed_pseudogene	5.56053e-08	-0.608392	0.655927	487.416	446.001	481.02	480.552	766.209	727.308	700.495
ENSG00000145864	GABRB2	protein_coding	5.83605e-08	-0.730415	0.602731	1208.72	587.129	765.804	737.762	1075.41	1214.9	1271.3
ENSG00000182054	IDH2	protein_coding	1.30269e-07	-0.853941	0.553271	256.093	131.177	102.905	104.348	194.469	197.944	242.615
ENSG00000138675	FGF5	protein_coding	2.09463e-07	-1.05254	0.482119	296.599	142.937	198.63	194.967	285.87	473.068	401.417
ENSG00000156395	SORCS3	protein_coding	2.70329e-07	-0.94422	0.519711	1358.16	503.9	622.215	614.191	889.696	1324.77	1267.77
ENSG00000149212	SESN3	protein_coding	4.60675e-07	-0.661619	0.632168	351.618	256.926	263.245	239.818	397.689	412.232	425.237
ENSG00000204634	TBC1D8	protein_coding	4.96378e-07	-0.958213	0.514694	118.579	92.2761	118.46	129.063	217.805	266.044	203.796
ENSG00000143603	KCNN3	protein_coding	5.41813e-07	-0.96367	0.512751	466.832	197.217	317.091	295.654	457.003	681	506.403
ENSG00000227579	RP1-35C21.2	lincRNA	5.30262e-06	-1.03253	0.488851	106.431	78.7061	112.477	99.7718	162.382	221.552	240.85
ENSG00000154721	JAM2	protein_coding	6.47586e-06	-1.04167	0.485766	82.2898	34.3774	50.2559	38.4442	87.5111	92.6161	84.6946
ENSG00000198840	MT-ND3	protein_coding	7.9792e-06	-0.726131	0.604523	971.459	677.596	879.478	1012.36	1508.11	1632.58	1280.12
ENSG00000277768	CCL3L3	protein_coding	1.27568e-05	-1.22251	0.428537	51.4632	56.994	41.8799	34.7828	135.156	98.9721	102.339
ENSG00000245532	NEAT1	lincRNA	1.31487e-05	-0.596238	0.661477	3038.94	2368.42	3063.21	2946.47	3757.14	4895.03	4436.76
ENSG00000163040	CCDC74A	protein_coding	1.40644e-05	-0.603985	0.657934	194.024	184.552	174.699	207.782	300.455	304.18	289.373
ENSG00000162896	PIGR	protein_coding	1.44515e-05	-0.987967	0.504188	140.831	82.3247	55.0421	59.4969	146.824	114.408	155.273
ENSG00000061337	LZTS1	protein_coding	2.15963e-05	-0.631082	0.645692	225.303	162.84	218.972	174.829	300.455	325.972	262.024
ENSG00000257221	RP11-689B22.2	antisense	2.92522e-05	-0.675319	0.626194	157.58	169.173	151.964	172.999	317.957	266.044	240.85
ENSG00000197381	ADARB1	protein_coding	6.83438e-05	-1.11686	0.461097	47.3005	40.71	34.7005	59.4969	95.2899	128.028	95.2814
ENSG00000268104	SLC6A14	protein_coding	7.49663e-05	-1.18739	0.439097	38.4984	34.3774	20.3417	30.2061	67.0919	65.376	80.2834
ENSG00000197705	KLHL14	protein_coding	8.34433e-05	-1.28045	0.411668	33.5584	23.5214	33.5039	32.9521	61.2578	93.5241	82.9301
ENSG00000187950	OVCH1	protein_coding	0.000100289	-1.01124	0.496121	70.1244	55.1847	64.6147	54.9202	86.5388	145.28	144.687
ENSG00000110848	CD69	protein_coding	0.000111154	-0.668152	0.629312	127.846	99.5134	93.3323	95.1951	156.548	141.648	181.74
ENSG00000197635	DPP4	protein_coding	0.000143409	-1.1738	0.443253	36.7472	31.6634	32.3073	20.1374	65.1472	77.18	63.5209
ENSG00000198825	INPP5F	protein_coding	0.000212391	-0.615762	0.652585	193.135	142.033	147.178	147.369	202.248	264.228	233.792
ENSG00000169429	CXCL8	protein_coding	0.000332156	-1.34657	0.393227	21.8247	22.6167	17.9485	18.3067	70.9812	47.216	50.2874
ENSG00000162897	FCAMR	protein_coding	0.000457698	-1.63513	0.321942	17.5867	13.57	7.17941	6.40736	32.0874	36.32	29.996
ENSG00000100505	TRIM9	protein_coding	0.000482955	-0.994063	0.502062	57.691	34.3774	39.4868	36.6135	71.9536	76.272	90.8702
ENSG00000166603	MC4R	protein_coding	0.000621539	-0.793168	0.577076	66.9158	82.3247	69.401	105.264	159.465	144.372	177.329
ENSG00000163683	SMIM14	protein_coding	0.000661865	-0.585993	0.666191	117.603	114.893	112.477	107.094	186.69	163.44	178.212
ENSG00000163563	MNDA	protein_coding	0.000668759	-0.596275	0.66146	146.292	161.031	149.571	152.861	265.45	224.276	249.673
ENSG00000255442	RP11-347H15.1	unprocessed_pseudogene	0.000780804	-0.722918	0.605871	91.4821	100.418	110.084	118.078	158.492	191.588	229.381
ENSG00000100867	DHRS2	protein_coding	0.00153636	-0.736546	0.600175	58.4827	68.7547	64.6147	60.4123	133.211	104.42	111.162
ENSG00000167604	NFKBID	protein_coding	0.00157545	-0.700028	0.61556	94.4446	77.8014	81.3666	83.2957	151.686	134.384	137.629
ENSG00000276116	FUT8-AS1	antisense	0.0017158	-0.814959	0.568425	56.039	37.996	27.5211	34.7828	75.843	57.204	61.7565
ENSG00000115896	PLCL1	protein_coding	0.00188693	-0.593911	0.662544	451.35	377.246	536.063	480.552	585.352	809.936	836.359
ENSG00000282319	CH17-8C20.5	unprocessed_pseudogene	0.00191803	-1.30897	0.403609	16.0562	12.6653	15.5554	11.8994	38.8938	38.136	37.0539
ENSG00000185792	NLRP9	protein_coding	0.00211445	-1.52361	0.347815	12.428	13.57	8.37598	10.0687	37.9215	39.044	33.5249
ENSG00000245904	RP11-796E2.4	antisense	0.0025483	-0.66895	0.628964	66.4969	66.0407	53.8456	58.5816	107.93	105.328	94.3992
ENSG00000121898	CPXM2	protein_coding	0.00278739	-0.688302	0.620584	173.801	35.282	44.273	37.5288	57.3684	84.444	60.8742
ENSG00000257522	RP11-562L8.1	processed_transcript	0.00448088	-0.842454	0.557694	47.1789	18.998	22.7348	24.7141	39.8662	43.584	49.4052
ENSG00000224424	PRKAR2A-AS1	antisense	0.00454339	-1.25885	0.417877	20.7183	9.04667	7.17941	12.8147	25.281	25.424	32.6427
ENSG00000122870	BICC1	protein_coding	0.00465287	-0.916077	0.529948	29.0946	20.8073	35.897	24.7141	59.3131	51.756	59.992
ENSG00000255198	SNHG9	lincRNA	0.00476956	-0.696306	0.617151	130.936	124.844	87.3495	95.1951	237.252	147.096	164.096
ENSG00000137877	SPTBN5	protein_coding	0.00721163	-0.971591	0.509943	29.0022	18.0933	16.752	17.3914	37.9215	48.124	32.6427
ENSG00000119771	KLHL29	protein_coding	0.00823635	-0.870744	0.546865	942.364	440.573	747.855	735.016	1025.82	1765.15	1226.31
ENSG00000228253	MT-ATP8	protein_coding	0.01282	-0.612968	0.65385	215.581	142.937	199.827	194.967	268.367	412.232	228.499
ENSG00000277448	RP11-538C21.2	lincRNA	0.0130459	-1.36952	0.387021	12.2267	10.856	3.5897	8.23803	17.5022	29.964	29.1138
ENSG00000257048	RP11-476M19.2	lincRNA	0.0141127	-1.19943	0.435448	32.0323	4.52334	4.78627	9.15337	17.5022	17.252	18.5269
ENSG00000248457	LINC02220	lincRNA	0.0150847	-0.620301	0.650535	86.9311	64.2314	86.1529	93.3644	111.82	142.556	162.331
ENSG00000225519	RP11-236B18.2	lincRNA	0.0163633	-0.627981	0.647081	78.5073	28.9494	22.7348	34.7828	43.7556	52.664	54.6986
ENSG00000118407	FILIP1	protein_coding	0.0172188	-0.613193	0.653748	101.012	35.282	45.4696	30.2061	51.5343	58.112	79.4012
ENSG00000255693	RP11-766N7.3	lincRNA	0.0242286	-0.692278	0.618876	30.7412	29.854	47.8627	32.0368	71.9536	66.284	65.2854
ENSG00000148225	WDR31	protein_coding	0.0256493	-0.73677	0.600081	36.0769	24.426	25.1279	23.7988	55.4237	42.676	45.8762
ENSG00000224559	LINC01087	lincRNA	0.0257632	-0.697675	0.616565	47.3669	34.3774	41.8799	54.9202	58.3408	106.236	83.8124
ENSG00000163638	ADAMTS9	protein_coding	0.0262596	-0.976096	0.508354	17.6755	13.57	10.7691	13.7301	31.1151	29.964	33.5249
ENSG00000255031	RP11-802E16.3	antisense	0.0265677	-0.639383	0.641987	46.372	30.7587	35.897	37.5288	69.0366	45.4	72.3433
ENSG00000127863	TNFRSF19	protein_coding	0.0273234	-0.651843	0.636467	173.484	15.3793	21.5382	16.4761	27.2257	32.688	35.2894
ENSG00000268034	AC005795.1	processed_pseudogene	0.0327212	-1.08518	0.471333	16.9891	11.7607	13.1623	13.7301	54.4514	28.148	27.3493
ENSG00000162981	FAM84A	protein_coding	0.0328085	-0.942205	0.520437	17.5751	18.0933	10.7691	6.40736	22.364	35.412	29.1138
ENSG00000183960	KCNH8	protein_coding	0.0361987	-0.672836	0.627272	29.7526	19.9027	28.7176	23.7988	42.7832	48.124	45.8762
ENSG00000155085	AK9	protein_coding	0.0362509	-0.624998	0.648421	46.1605	25.3307	20.3417	29.2908	52.5067	37.228	47.6407
ENSG00000223949	ROR1-AS1	antisense	0.0487095	-0.707026	0.612581	21.6469	11.7607	25.1279	20.1374	39.8662	40.86	35.2894
