# Supplementary material for: Ectopic expression of HIV-1 Tat modifies gene expression in cultured B cells: implications for the development of B-cell lymphomas in HIV-1-infected patients
Source: PeerJ. 2022 Oct 18;10:e13986. doi: 10.7717/peerj.13986 (PMC9586123; doi:10.7717/peerj.13986)
Supplement: Supplemental Information 7 [file peerj-10-13986-s007.xlsx]

## Sheet: Chromosome aberrations
Cell line	Number of cells	Translocation		Dicentrics		Deletion		Acentrics		Aneuploidy		Polyploidy		Polyploidy with aneuploidy		Premature separation of sister chromatids		Total structural aberrations
		n	freq.	n	freq.	n	freq.	n	freq.	n	freq.	n	freq.	n	freq.	n	freq.	n	freq.
RPMI	1091	4	0.366636	1	0.091659	6	0.549954	8	0.733272	5	0.458295	11	1.00825	6	0.549954	5	0.458295	19	1.74152
RPMIEGFP	1425	13	0.912281	1	0.0701754	17	1.19298	7	0.491228	8	0.561404	9	0.631579	5	0.350877	7	0.491228	38	2.66667
RPMITat	1592	25	1.57035	3	0.188442	27	1.69598	31	1.94724	11	0.690955	24	1.50754	8	0.502513	8	0.502513	86	5.40201
RPMICys	1570	40	2.54777	5	0.318471	23	1.46497	15	0.955414	16	1.01911	16	1.01911	4	0.254777	3	0.191083	83	5.28662
