# Supplementary material for: Ectopic expression of HIV-1 Tat modifies gene expression in cultured B cells: implications for the development of B-cell lymphomas in HIV-1-infected patients
Source: PeerJ journal article supplement (doi:10.7717/peerj.13986), 2022-10-18
Supplement: Supplementary_Figures.pdf [file Supplementary_Figures.pdf]

## Supplementary Figures

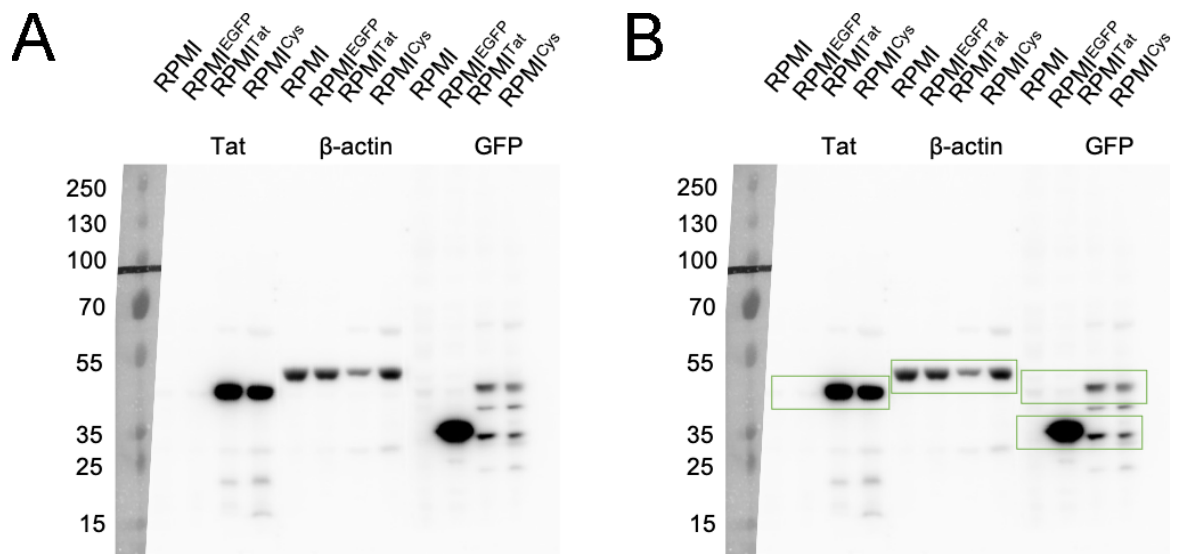

**Figure S1. Nonprocessed images of the western blot experiment presented in Fig. 1C. (A)** Nonprocessed image. **(B)** Image with the cropped regions of interest, which are presented in Fig. 1C.

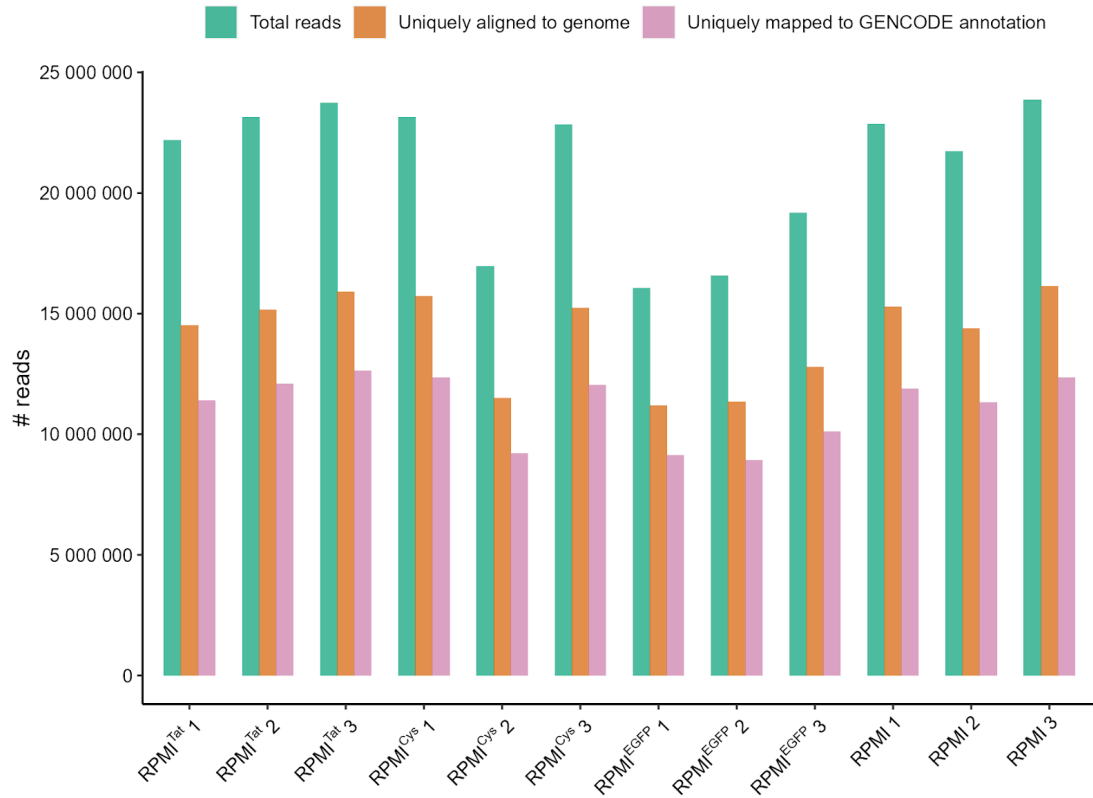

**Figure S2. The number of reads at different stages of RNA-seq analysis: total reads obtained from RNA sequencing, reads that were uniquely aligned to the reference human genome GRCh38.p10, and reads that were unambiguously mapped to the GENCODE v26 gene annotation.**

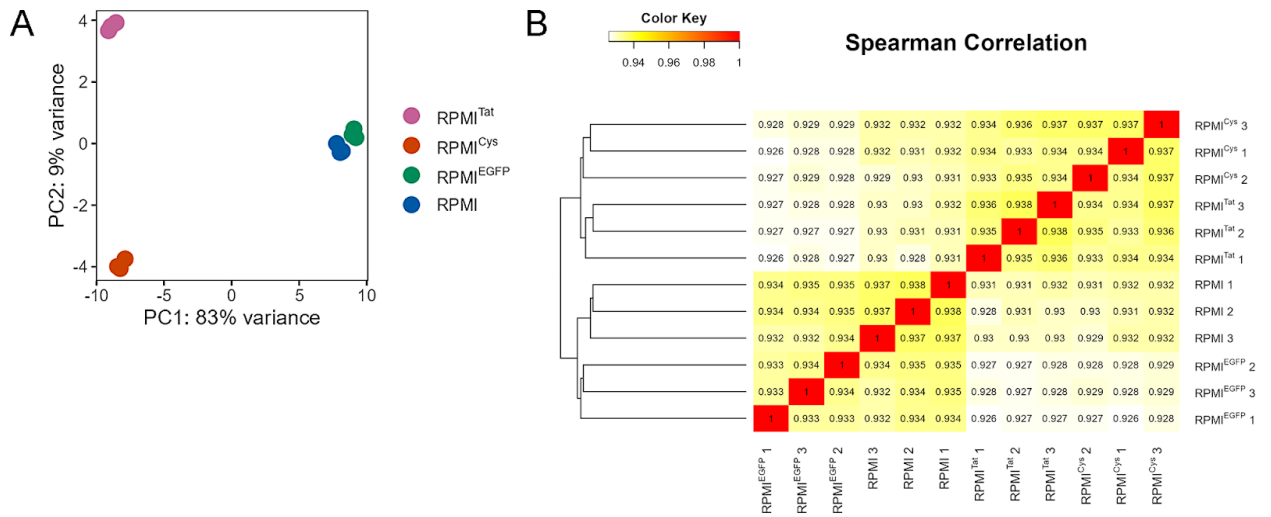

**Figure S3. Quality control of the RNA-seq replicates.** (A) PCA performed on regularized log-transformed filtered count data. (B) Heatmap of Spearman correlation coefficients between DESeq2-normalized gene expression profiles.

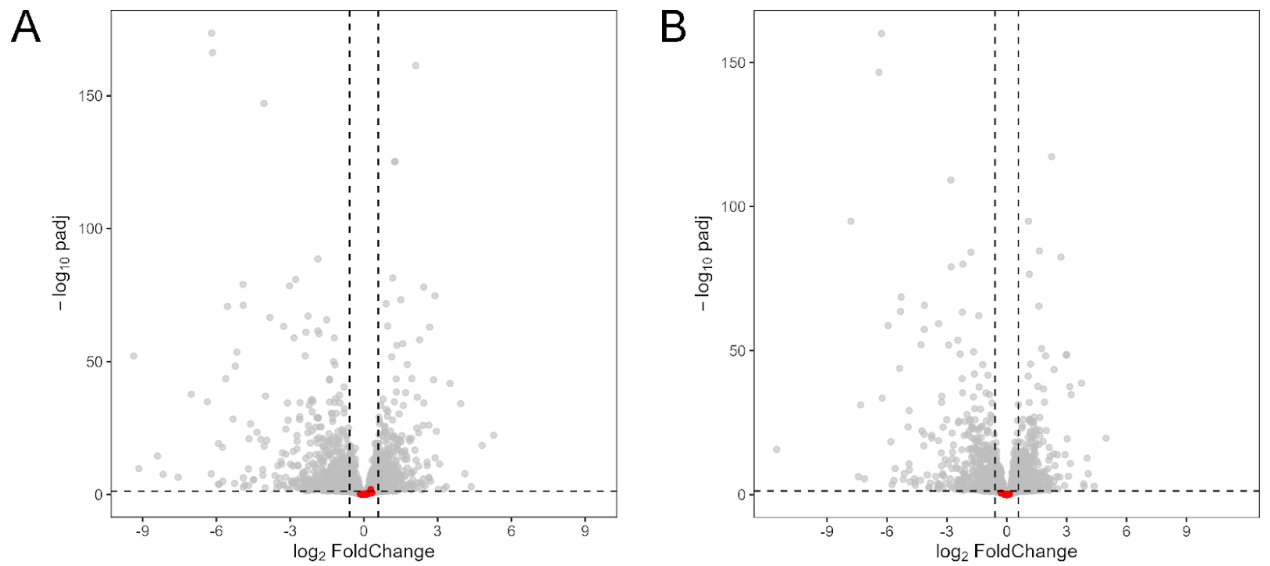

**Figure S4. Tat protein had no impact on the expression of EBV genes in RPMI<sup>Tat</sup> cells.** The volcano plot shows the logarithm of the fold change in gene expression (along the X-axis) and the significance of the gene expression change (along the Y-axis). EBV genes are highlighted in red, and human genes are shown as gray dots. (A) RPMI<sup>Tat</sup> cells. (B) RPMI<sup>Cys</sup> cells.

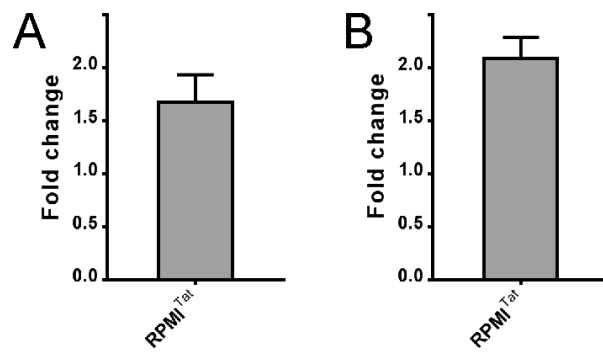

**Figure S5. Validation of the RNA-seq dataset using qRT-PCR (mean  $\pm$  SEM; n = 3). (A) MALAT1 gene. (B) NEAT1 gene.**
