# Supplementary material for: Ectopic expression of HIV-1 Tat modifies gene expression in cultured B cells: implications for the development of B-cell lymphomas in HIV-1-infected patients
Source: PeerJ journal article supplement (doi:10.7717/peerj.13986), 2022-10-18
Supplement: Table_S2.pdf [file Table_S2.pdf]

**Table S2.** Primers used in this study.

|                        |                                                                            |
|------------------------|----------------------------------------------------------------------------|
| <b><i>NEAT 1_2</i></b> | 5'-GCTTATCCCACAGCACACAC-3'<br>5'-CTAAGTCCCAACCTGCCGAT-3'                   |
| <b><i>MALAT1</i></b>   | 5'-GACGGAGGTTGAGATGAAGC-3'<br>5'-ATTCTGGGGCTCTGTAGTCCT-3'                  |
| <b><i>UBC</i></b>      | 5'-GTCGCAGCCGGGATTTGGGT-3'<br>5'-GTCAGACAGGGTGCGCCCAT-3'                   |
| <b><i>YWHAZ</i></b>    | 5'-ACTTTTGGTACATTGTGGCTTCAA-3'<br>5'-CCGCCAGGACAAACCAGTAT-3'               |
| <b><i>HPRT1</i></b>    | 5'-TGTAATGACCAGTCAACAGGGGACA-3'<br>5'-TCCAACACTTCGTGGGGTCCT-3'             |
| <b><i>IL6R</i></b>     | 5'-CTCCTGCCAGTTAGCAGTCC-3'<br>5'-TCTTGCCAGGTGACACTGAG-3'                   |
| <b><i>IL2RB</i></b>    | 5'-GCCCCCATCTCCCTCCAAGT-3'<br>5'-AGGGGAAGGGCGAAGAGAGC-3'                   |
| <b><i>CCR4</i></b>     | 5'-TGTTCACTGCTGCCTTAATCCCATC-3'<br>5'-TGGACTGCGTGTAAGATGAGCTGG-3'          |
| <b><i>IL1R</i></b>     | 5'-CCTGCTATGATTTTCTCCCAATAAA-3'<br>5'-<br>AACACAAAATATCACAGTCAGAGGTAGAC-3' |
| <b><i>IL21R</i></b>    | 5'-GTGTGGATTCTCACCCAGGC-3'<br>5'-TGCCTCATCTTCTGTTTCGGCT-3'                 |
| <b><i>IL27R</i></b>    | 5'-GTCTGCATGAATGTGAGTGGC-3'<br>5'-AACAGGAACAAGCCCCACAA-3'                  |
| <b><i>IL17R</i></b>    | 5'-GAGAGCCGACCGTTC AATGT-3'<br>5'-CTTCAACAAGCGGATGCTGG-3'                  |
| <b><i>TLR8</i></b>     | 5'-TGGGAAAGGAGACTAAAAAGGAAA-3'<br>5'-TCTGGTGCTGTACATTGGGG-3'               |

|               |                                                               |
|---------------|---------------------------------------------------------------|
| <i>NLRP4</i>  | 5'-CCTGGTATACCTGATGTTGGCT-3'<br>5'-TCTCCGATTTTCATTGCACCCA-3'  |
| <i>CCL3L1</i> | 5'-AGGTCCTCTCTGCACCACTT-3'<br>5'-CTCTCTTGGTTAGGAAGATGACACT-3' |
| <i>TLR7</i>   | 5'-TGCCATCAAGAAAGTTGATGCTAT-3'<br>5'-CAGAGTGACATCACAGGGCA-3'  |
| <i>STAT1</i>  | 5'-GAACGGAGGCGAACCTGACT-3'<br>5'-GCAAGGCTGGCTTGAGGTT-3'       |
